# Supplementary material for: Sustainable development goals and multisectoral collaborations for child health in Cambodia: a qualitative interview study with key child health stakeholders
Source: PubMed Central journal article supplement (PMC10668300; doi:10.1136/bmjopen-2023-073853), 2023-11-21
Supplement: bmjopen-2023-073853.draft_revisions.pdf [file bmjopen-2023-073853.draft_revisions.pdf]

# BMJ Open

BMJ Open is committed to open peer review. As part of this commitment we make the peer review history of every article we publish publicly available.

When an article is published we post the peer reviewers' comments and the authors' responses online. We also post the versions of the paper that were used during peer review. These are the versions that the peer review comments apply to.

The versions of the paper that follow are the versions that were submitted during the peer review process. They are not the versions of record or the final published versions. They should not be cited or distributed as the published version of this manuscript.

BMJ Open is an open access journal and the full, final, typeset and author-corrected version of record of the manuscript is available on our site with no access controls, subscription charges or pay-per-view fees (<http://bmjopen.bmj.com>).

If you have any questions on BMJ Open's open peer review process please email [info.bmjopen@bmj.com](mailto:info.bmjopen@bmj.com)

# BMJ Open

## Sustainable development goals and multisectoral collaborations for child health in Cambodia: a qualitative interview study with key child health stakeholders

|                               |                                                                                                                                                                                                                                                                                                                                                                                                                                                                                                            |
|-------------------------------|------------------------------------------------------------------------------------------------------------------------------------------------------------------------------------------------------------------------------------------------------------------------------------------------------------------------------------------------------------------------------------------------------------------------------------------------------------------------------------------------------------|
| Journal:                      | <i>BMJ Open</i>                                                                                                                                                                                                                                                                                                                                                                                                                                                                                            |
| Manuscript ID                 | bmjopen-2023-073853                                                                                                                                                                                                                                                                                                                                                                                                                                                                                        |
| Article Type:                 | Original research                                                                                                                                                                                                                                                                                                                                                                                                                                                                                          |
| Date Submitted by the Author: | 20-Mar-2023                                                                                                                                                                                                                                                                                                                                                                                                                                                                                                |
| Complete List of Authors:     | <p>Helldén, Daniel ; Karolinska Institutet, Department of Global Public Health<br/> Sok, Serey; Royal University of Phnom Penh, Research Office<br/> Chea, Thy; Malaria Consortium<br/> Nordenstedt , Helena; Karolinska Institute, Department of Global Public Health<br/> Kuruvilla, Shyama ; WHO International<br/> Alvesson, Helle; Karolinska Institutet, Department of Global Public Health<br/> Alfvén, Tobias ; Karolinska Institute, Global Public Health; Sachs' Children and Youth Hospital</p> |
| Keywords:                     | Health policy < HEALTH SERVICES ADMINISTRATION & MANAGEMENT, Community child health < PAEDIATRICS, Organisation of health services < HEALTH SERVICES ADMINISTRATION & MANAGEMENT                                                                                                                                                                                                                                                                                                                           |
|                               |                                                                                                                                                                                                                                                                                                                                                                                                                                                                                                            |

SCHOLARONE™  
Manuscripts

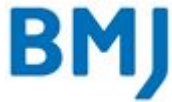

I, the Submitting Author has the right to grant and does grant on behalf of all authors of the Work (as defined in the below author licence), an exclusive licence and/or a non-exclusive licence for contributions from authors who are: i) UK Crown employees; ii) where BMJ has agreed a CC-BY licence shall apply, and/or iii) in accordance with the terms applicable for US Federal Government officers or employees acting as part of their official duties; on a worldwide, perpetual, irrevocable, royalty-free basis to BMJ Publishing Group Ltd ("BMJ") its licensees and where the relevant Journal is co-owned by BMJ to the co-owners of the Journal, to publish the Work in this journal and any other BMJ products and to exploit all rights, as set out in our [licence](#).

The Submitting Author accepts and understands that any supply made under these terms is made by BMJ to the Submitting Author unless you are acting as an employee on behalf of your employer or a postgraduate student of an affiliated institution which is paying any applicable article publishing charge ("APC") for Open Access articles. Where the Submitting Author wishes to make the Work available on an Open Access basis (and intends to pay the relevant APC), the terms of reuse of such Open Access shall be governed by a Creative Commons licence – details of these licences and which [Creative Commons](#) licence will apply to this Work are set out in our licence referred to above.

Other than as permitted in any relevant BMJ Author's Self Archiving Policies, I confirm this Work has not been accepted for publication elsewhere, is not being considered for publication elsewhere and does not duplicate material already published. I confirm all authors consent to publication of this Work and authorise the granting of this licence.

1  
2  
3 1 **Title:** Sustainable development goals and multisectoral collaborations for child health in Cambodia: a  
4  
5 2 qualitative interview study with key child health stakeholders  
6  
7  
8 3  
9

10 4 **Authors:** Daniel Helldén<sup>1\*</sup>, Serey Sok<sup>2</sup>, Thy Chea<sup>3</sup>, Helena Nordenstedt<sup>1</sup>, Shyama Kuruvilla<sup>4</sup>, Helle  
11  
12 5 Mölsted Alvesson<sup>1</sup>, Tobias Alfvén<sup>4,5</sup>  
13  
14 6

15  
16 7 **Affiliations:**

17  
18 8 <sup>1</sup>Department of Global Public Health, Karolinska Institutet, Stockholm, Sweden

19  
20 9 <sup>2</sup>Research Office, Royal University of Phnom Penh, Phnom Penh, Cambodia

21  
22 10 <sup>3</sup>Malaria Consortium, Phnom Penh, Cambodia

23  
24 11 <sup>4</sup>World Health Organization, Geneva, Switzerland

25  
26 12 <sup>5</sup>Sachs' Children and Youth Hospital, Stockholm, Sweden  
27  
28  
29  
30 13

31  
32 14 **Keywords:** multisectoral collaboration, health policy, child health, SDGs  
33  
34 15

35  
36 16 **Number of**

37  
38 17 Tables: 2

39  
40 18 Figures: 0

41  
42 19 Words: 4608  
43  
44  
45 20  
46  
47 21  
48  
49 22  
50  
51 23  
52  
53 24  
54  
55  
56

---

57 <sup>1</sup> Affiliation: Department of Global Public Health, Karolinska Institutet, Stockholm, Sweden  
58 Address: Tomtebodavägen 18 A, SE-171 77 Stockholm, Sweden  
59 Email: daniel.hellden@ki.se  
60 Telephone: +46732406555

## 25 Abstract

26 Objectives: Multisectoral collaboration highlighted as key in delivering on the Sustainable  
27 Development Goals (SDGs), but still little is known on how to move from rhetoric to action. Cambodia  
28 has made remarkable progress on child health over the last decades with multisectoral collaborations  
29 being a key success factor. However, it is not known how country stakeholders perceive the SDGs, the  
30 concept of child health in the context of the SDGs and multisectoral collaborations for child health in  
31 Cambodia.

32 Methods: Through purposive sampling, we conducted semi-structured interviews with 29 key child  
33 health stakeholders from a range of government and non-governmental organisations. Guided by  
34 framework analysis, themes, sub-themes and categories were derived.

35 Results: We found that the adoption of the SDGs led to increased possibility for action and higher  
36 ambitions for child health in Cambodia, while simultaneously establishing child health as a  
37 multisectoral issue. There seem to be a discrepancy between the desired step-by-step theory of  
38 conducting multisectoral collaboration and the real-world complexities including funding and power  
39 dynamics that heavily influence the process of collaboration. Identified success factors for  
40 multisectoral collaborations included having clear responsibilities, leadership from all and trust among  
41 stakeholders while the major obstacle found was lack of sustainable funding.

42 Conclusion: The findings from this in-depth multistakeholder study can inform policy makers and  
43 practitioners on the theoretical and practical process as well as influencing aspects that shape  
44 multisectoral collaborations in general and for child health specifically. This is vital if multisectoral  
45 collaborations are to be successfully leveraged to accelerate the work towards achieving better child  
46 health in the era of the SDGs.

## 50 Strengths and limitations

51 - This is the first study to provide in-country insights on multisectoral collaborations for child health  
52 that can be transferable to similar settings.

53 - We have explored the themes surrounding multisectoral collaboration for child health broadly,  
54 capturing important discrepancies, success factors and obstacles through the semi-structured  
55 interviews with a relatively large sample of child health stakeholders.

56 - The sample participants interviewed is unbalanced in terms of gender and expertise in different  
57 SDG areas.

58

59

60

61

62

63

## 64 INTRODUCTION

65 Almost halfway until the United Nations Sustainable Development Goals (SDGs) are to be achieved,  
66 practitioners, experts and policy makers are trying to speed up the pace of progress on child health.  
67 This has become even more urgent with the setback of the COVID-19 pandemic which left 147 million  
68 children out of proper education, rising child labor and significantly higher rates of malnutrition and  
69 over 22 million children missing essential vaccinations.[1,2] Over the last decades it has become  
70 evident that progress made in other sectors heavily impact the possibility to make progress on child  
71 health and well-being.[3,4] Further, progress on child health and well-being are essential for tackling  
72 poverty and promote the development of societies.[5] Moving beyond mere child survival, there is  
73 now a larger focus on enabling children to thrive and reach their full potential.[5,6]

74  
75 Multisectoral collaborations have long been seen as critical for achieving gains in health and well-being  
76 when it comes to universal health coverage, non-communicable diseases and succeeding in governing  
77 multisectoral issues going back to the World Health Organization (WHO) Constitution and the Alma  
78 Ata Declaration.[7–9] For child health a multisectoral approach to areas such as nutrition[10] and  
79 education[11,12] have been studied, however there is lack of understanding how multisectoral  
80 collaborations work out on a country level. Further, a generic analysis of the linkages between the  
81 SDGs and child health found that there are many synergies between making progress on the SDGs and  
82 accelerating progress on child health, suggesting that multisectoral collaboration could harness  
83 synergies and better handle tradeoffs between the SDGs and child health.[13]

84  
85 During the Millennium Development Goal era many countries made significant gains in child health,  
86 and approximately half of the reduction in child mortality between 1990 and 2010 have been  
87 attributed to investments in sectors outside of health.[14] Cambodia was one of the fast-track  
88 countries and made significant progress including succeeded in lowering the under-five mortality from  
89 116 to 29 deaths per 1000 live births from 1990 to 2015.[15] Many challenges persist however, with  
90 significant inequalities between rural and urban areas, lower than desired educational attainment and  
91 sub-optimal water and sanitation conditions in schools and residential areas.[16] It has been shown  
92 that multisectoral efforts, such as the ID Poor program, have been successful in reducing poverty and  
93 collaborative initiatives between non-health sectors have become a cornerstone of the maternal and  
94 child health strategy in Cambodia.[17–19]

95  
96 Cambodia has managed to improve the health and well-being of children over a short period of time  
97 while utilizing collaborations across sectors to do so among other changes. However, it is not known  
98 how child health stakeholders have been influenced by the SDGs or how they theorize multisectoral  
99 collaborations, here defined as “multiple sectors and stakeholder intentionally coming together and  
100 collaborating in a managed process to achieve shared outcomes and common goals”[20], versus the  
101 actual practice of conducting such collaborations. Hence, our aim was to understand how stakeholders  
102 in Cambodia perceive the SDGs, child health in the era of the SDGs and multisectoral collaborations for  
103 child health in Cambodia.

104

## 105 **METHODS**

### 106 **Study design and setting**

107 Guided by the The COnsolidated criteria for REporting Qualitative (COREQ) recommendations[21] and  
108 the concept of information power[22] this study utilizes semi-structured interviews to investigate how  
109 Cambodian stakeholders perceive the SDGs, the concept of child health in the era of the SDGs and  
110 multisectoral collaborations for child health in Cambodia. The country is governed primarily through  
111 the national government, which consist of the council of ministers led by the prime minister while the  
112 parliament (national assembly and senate) have legislative power. Administratively the country is  
113 divided into provinces, districts, communes and villages.[23] During the last decade, the government  
114 has incrementally favored a more decentralized approach where districts and commune government  
115 officials are given more funding and implementing power.[24] Collaboration between government and  
116 non-government stakeholders on primarily occur on two levels, the national or sub-national (district  
117 or commune) level and been characterized by an increased role of the government in leading and  
118 coordinating collaborations.[25,26]

119

### 120 **Participant identification and recruitment**

121 Key child health stakeholders with country specific knowledge as well as non-health sector  
122 stakeholders on a national level in Cambodia were identified for participation by the research team.  
123 Participants were purposively selected based on predefined criteria of having expertise in child health  
124 or being from a non-health sector (for example water and sanitation, agriculture, infrastructure etc.)  
125 but with implementation knowledge of how child health interacts with other sectors in Cambodia.  
126 Efforts were made to recruit participants from many different sectors, including having participants  
127 from inside and outside of government. Further, the recruitment of participants was aimed to be  
128 balanced in terms of sex and seniority. The expected total number of participants was 30, balancing  
129 the need for reaching satisfactory information power[22] and feasibility.

130

### 131 **Data collection**

132 A total of 29 participants were interviewed between April-June 2020. The characteristics of the  
133 participants can be found in **Table 1**. Information was given verbally to all participants on the purpose  
134 of the study, what their involvement in the study would be, the risks and benefits of taking part in the  
135 study, and that they had the right to decline participation or withdraw from the study at any time for  
136 any reason. Participants were asked to sign an informed consent form, written in Khmer before the  
137 interview started. The interviews were held in Khmer by authors SS and TC, audio recorded and  
138 transcribed verbatim into English. The interviews took place in Phnom Penh city vicinity, at the  
139 participant's place of employment or other convenient but private location for the participant. An  
140 interview guide was developed based on established multisectoral frameworks; the SDG Synergies  
141 framework[27], Health in all policies approach[28] and multisectoral collaborative model presented by  
142 Kuruvilla et al[20] (see **Supplementary Material 1** for interview guide). The interview started with  
143 general background information on the participant, the perception of the SDGs, child health and  
144 multisectoral collaboration and then focused on multisectoral collaboration for child health within the  
145 Cambodia context (identification of problem, design, implementation, and monitoring of the

1  
2  
3 146 collaboration as well as relationships and capacity building activities). Two pilot interviews were held  
4 147 where after the interview guide was slightly adjusted for clarity.  
5  
6  
7  
8  
9  
10  
11  
12  
13  
14  
15  
16  
17  
18  
19  
20  
21  
22  
23  
24  
25  
26  
27  
28  
29  
30  
31  
32  
33  
34  
35  
36  
37  
38  
39  
40  
41  
42  
43  
44  
45  
46  
47  
48  
49  
50  
51  
52  
53  
54  
55  
56  
57  
58  
59  
60

For peer review only





1  
2  
3  
4  
5  
6  
7  
8  
9  
10  
11  
12  
13  
14  
15  
16  
17  
18  
19  
20  
21  
22  
23  
24  
25  
26  
27  
28  
29  
30  
31  
32  
33  
34  
35  
36  
37  
38  
39  
40  
41  
42  
43  
44  
45  
46

|     |    |        |      |                  |  |  |  |  |  |  |  |  |  |  |  |  |  |  |  |
|-----|----|--------|------|------------------|--|--|--|--|--|--|--|--|--|--|--|--|--|--|--|
| 149 | 16 | Male   | >15  | Non-governmental |  |  |  |  |  |  |  |  |  |  |  |  |  |  |  |
| 150 | 17 | Male   | >15  | Non-governmental |  |  |  |  |  |  |  |  |  |  |  |  |  |  |  |
| 151 | 18 | Male   | 6-14 | Non-governmental |  |  |  |  |  |  |  |  |  |  |  |  |  |  |  |
| 152 | 19 | Female | 1-5  | Non-governmental |  |  |  |  |  |  |  |  |  |  |  |  |  |  |  |
| 153 | 20 | Male   | >15  | Non-governmental |  |  |  |  |  |  |  |  |  |  |  |  |  |  |  |
| 154 | 21 | Male   | >15  | Non-governmental |  |  |  |  |  |  |  |  |  |  |  |  |  |  |  |
| 155 | 22 | Female | >15  | Non-governmental |  |  |  |  |  |  |  |  |  |  |  |  |  |  |  |
| 156 | 23 | Male   | >15  | Non-governmental |  |  |  |  |  |  |  |  |  |  |  |  |  |  |  |
| 157 | 24 | Female | >15  | Non-governmental |  |  |  |  |  |  |  |  |  |  |  |  |  |  |  |
| 158 | 25 | Male   | >15  | Non-governmental |  |  |  |  |  |  |  |  |  |  |  |  |  |  |  |
| 159 | 26 | Male   | >15  | Non-governmental |  |  |  |  |  |  |  |  |  |  |  |  |  |  |  |
| 160 | 27 | Male   | 6-14 | International    |  |  |  |  |  |  |  |  |  |  |  |  |  |  |  |
| 161 | 28 | Female | 6-14 | International    |  |  |  |  |  |  |  |  |  |  |  |  |  |  |  |
| 162 | 29 | Male   | >15  | International    |  |  |  |  |  |  |  |  |  |  |  |  |  |  |  |
| 163 |    |        |      |                  |  |  |  |  |  |  |  |  |  |  |  |  |  |  |  |

### Data analysis

Transcripts were imported into NVivo software for analysis. The transcripts were first analyzed by framework method analysis[29] by which the transcripts were read in full by DH, then coded through identification of meaning units, combining these into sub-categories and then grouped into overarching categories and lastly themes following the standard methodology. The themes, categories and sub-categories were inductively developed without prior anticipations [30] and continuously developed during the review of the transcripts. The coding was cross-checked by HMA and the analysis was continuously discussed with SS and TC to improve trustworthiness and validity.[22]

### Patient and public involvement

No patients or public representative were directly involved in the design, conduct or reporting of this study. The findings will be disseminated and discussed with involved stakeholders. A reflexivity statement can be found in the **Supplementary Material 2**.

## RESULTS

A diverse set of perspectives on the research questions out of which two main themes were developed in addition to several sub-themes and categories (**Table 2**, see **Supplementary Material 1** for full coding tables and COREQ checklist). The first theme related to the views of the participants on how the SDGs and expanded view on child health enable change the and the second main theme detailed the gap between theory and real-world complexities of conducting multisectoral collaborations for child health.

**Table 2.** Main themes, sub-themes and categories

| Themes            | SDGs and expanded view on child health enable change                                                                                              |                                                                                                                                                                                     | Gap between theory and real-world complexities                                                                                                                           |                                                                                   |                                    |
|-------------------|---------------------------------------------------------------------------------------------------------------------------------------------------|-------------------------------------------------------------------------------------------------------------------------------------------------------------------------------------|--------------------------------------------------------------------------------------------------------------------------------------------------------------------------|-----------------------------------------------------------------------------------|------------------------------------|
| <b>Sub-themes</b> | Possibility for action due to SDGs                                                                                                                | Higher ambitions for child health, a multisectoral area at heart                                                                                                                    | Planned linear process of collaboration                                                                                                                                  | Real-world complexities shaping the collaboration                                 | Critically assessing collaboration |
| <b>Categories</b> | SDGs provide a common vision and guide<br><br>Government commitment to and leadership of SDGs<br><br>Discrepancy between ambition and actual work | Definition of child health<br><br>Child health linkages across sectors<br><br>Aspects of the health system and actors unique to children<br><br>Special considerations for children | Identifying and framing problem<br><br>Actors and topics<br><br>Planning<br><br>Coordination<br><br>Implementation<br><br>Monitoring and evaluation<br><br>Dissemination | Funding<br><br>Relationships<br><br>Enabling environment<br><br>Capacity building | Success factors<br><br>Obstacles   |

### SDGs and expanded view on child health enable change

Overall, interviewees reflected on the willingness by the government to adopt the SDGs, how the possibility to achieving the SDGs depends on the outlook for the country while concluding that child health is a multisectoral topic at heart and that with the introduction of the SDGs the participants had set higher ambitions for child health and well-being.

#### Possibility for action due to SDGs

The 2030 Agenda and the SDGs were thought of as a universally relevant vision for sustainable development, providing a concrete roadmap or guide for each country. Comparing with the previous Millennium Development Goals, participants reflected on how the SDGs represent a more complex and detailed set of objectives that mirror actual conditions in the country. There was an overall agreement that the SDGs showcase that health is a multisectoral issue more clearly than during the Millennium Development Goals era. However, although the commitment to and leadership of the government of Cambodia in adopting and implementing the Cambodian Sustainable Development Goals were evident, some participants noted the discrepancy between the highly set ambitions of the contextualised SDGs with the resources and work committed.

*“That’s the difference in perspectives between policymakers and implementers. The implementers in the ministry will complain about having lots of challenges and risks which could lead to a lower result. So, the plan to achieve many things by 2030 has already been written down. However, the implementation need budget and solutions to the challenge.”* - Nr 21, non-governmental organisation

#### Higher ambitions for child health, a multisectoral area at heart

Focusing on child health, most regarded children as people under the age of 18 and emphasised that physical and mental health are of equal importance to children. Interviewees detailed a range of linkages between child health and other sectors, mostly focusing on education and schooling, nutrition and other general societal conditions such as physical safety, environment, economic development and social protection systems. Overall, there was a strong notion of indivisibility between child health and its determinants, making the case that child health by definition is a multisectoral issue with all sectors responsible for its improvement.

*“Like I mentioned, child health consists of physical, mental and social health. So, we need all relevant institutions to improve physical, mental and social health. We can’t miss anyone to work on it.”* - Nr 5, governmental organisation

Interviewees put an emphasis on the family as responsible for the child’s health, while other stakeholders (government, international organisations and private sector) play an important role in shaping the determinants of child health in Cambodia. They further urged a concrete focus on preventive measures, improving quality and reach of health services related to the child and the family to improve child health further. Lastly, interviewees made the case for a life course approach to child health and setting a higher ambition for children with a focus on child growth and stronger acknowledgment of the rights of the child.

*“To understand about the needs of children, we need to understand the growth of them first. Children’s development consists of children before birth, children after birth to two years old, children in*

1  
2  
3 *kindergarten and primary school, and children in high school. The development of children on physical*  
4 *health, education and morality are ongoing process.” - Nr 5, governmental organisation*  
5  
6  
7

### 8 **Gap between theory and real-world complexities**

9

10 When discussing multisectoral collaborations for child health, it became clear that there is a step-by-  
11 step linear process of thinking around the collaboration and its activities while aspects influencing the  
12 collaboration shape and direct the process in non-linear fashions. Participants also critically assess the  
13 collaborations, identifying success factors and obstacles for these types of collaborations in Cambodia.  
14  
15

#### 16 **Planned linear process of collaboration**

17  
18 The beginning of a multisectoral collaboration typically began with the identification and framing of a  
19 problem. This could be from a top-down approach, whereby government ministries identified a gap or  
20 need, or through policy or development plans while funding opportunities and the own organisational  
21 strategy or values could be other ways of identifying a problem. On the other hand, interviewees also  
22 described a bottom-up approach of problems being identified through routine data or findings from  
23 the grassroot level, complemented by listening and learning from community or sub-national  
24 stakeholders. The identified problem was often not primarily concerned with health but noted that  
25 child health might stand to benefit as an effect of a successful solution to the problem. The problem  
26 was typically framed in a detailed problem statement following involvement of many stakeholders in  
27 collective process, often using research in some way to narrow the problem.  
28  
29

30  
31 *“So, the needs can be identified through annual reports and through our observation in different*  
32 *sectors. Sometimes, we also do things following the donors’ research and findings.” – Nr 1,*  
33 *governmental organisation.*  
34  
35

36  
37  
38 *“They (government officials) collected all data from institutions under Ministry of Health. Then, they*  
39 *identified the challenge and priority action plans for next year. Besides, each unit need to monitor their*  
40 *annual results and to identify the priority action plans. That’s how the Ministry of Health and different*  
41 *units identify the needs on child health, status, results and ways forward to reach SDGs.”- Nr 6,*  
42 *governmental organisation.*  
43  
44

45  
46  
47 The stakeholders involved in the discussed collaborations varied substantially, however the  
48 government was seen as a natural leader of collaborations while non-governmental organisations  
49 often organised in networks. Interviewees expressed territory feelings, with relatively strict boundaries  
50 between stakeholders and a critical view of government by the non-governmental organisations and  
51 vice versa.  
52

53  
54 *“I am not blaming the government institutions, but there are some institutions which have too clear*  
55 *boundaries on their responsibilities and work. This leads to failure in our work. “ – Nr 29, international*  
56 *organisation.*  
57

58 Planning of the collaboration were seen as a complex, detailed and resource demanding process. Often  
59 not formalised, a capacity assessment of the stakeholders in the collaboration, primarily focusing on  
60

1  
2  
3 implementation capacity, were seen as key with the division of activities based on this assessment. If  
4 there was not enough capacity to solve the problem identified, the collaboration could not begin.  
5 During the planning process interviewees noted that prioritization of activities was done depending on  
6 the funding requirements and to secure buy-in from certain stakeholders (particularly government)  
7 seen as necessary for the success of the collaboration.  
8  
9

10 *“For example, they (government servants) may plan 20 activities, but receive inadequate budget. So,*  
11 *they prioritize the activities to be done. According to my observation, district level is the same. They*  
12 *engage politics into their work. They like infrastructure development more than social development*  
13 *because it is eye-catching and visible.” – Nr 9, governmental organisation.*  
14  
15

16 Coordination was done in various ways depending on the collaboration however there were usually a  
17 common information sharing mechanisms, focal points at each stakeholder or joint committees with  
18 continuous coordination often built on somewhat already existing structures. There was also a clear  
19 division of responsibilities, although participation in joint coordination could be difficult to achieve and  
20 often those who coordinate do not have decision making power. Clear leadership of the collaboration  
21 was seen as paramount, with coordination succeeding or faltering based on the competence and  
22 willingness of the leader. As such, coordination was both a formal and informal process. Indeed, power  
23 and hierarchies shaped the coordination efforts where power imbalances or competition for funds  
24 between stakeholders could threaten the whole collaboration.  
25  
26  
27

28 *“Those people also need to have the authorization in decision-making in the meeting. In the past, there*  
29 *were people who attended the meeting, but did not do what were discussed. It was useless when people*  
30 *came to listen, but didn’t share to their management and colleagues.” – Nr 15, non-governmental*  
31 *organisation.*  
32  
33

34 Implementation of the collaboration tried to follow the planning and set coordination mechanisms.  
35 However, collaborations were able to change depending on a change in the context or influencing  
36 aspects such as the Covid-19 pandemic or funding changes. Interviewees emphasised the difference  
37 between the national and sub-national level in terms of the collaboration, with larger collaborations  
38 having an administrative or policy function at the national level while implementation occurred at the  
39 sub-national level. This structure often led to increased complexities, with a different set of  
40 stakeholders needing to be involved at the different levels and the sub-national system having its own  
41 set of priorities.  
42  
43  
44

45 *“National level only work on policy. So, implementation goes to community level. I think that we should*  
46 *focus on provincial and communal level first to let them implement the work. We should also try to*  
47 *integrate the coordination with national level too by using forum to meet and discuss on the challenge.”*  
48 *- Nr 28, international organisation.*  
49  
50

51 Monitoring and evaluation were seen as integral to the collaboration, enabling learning and  
52 improvement of the collaboration itself and its activities and serving as the main accountability  
53 mechanism. The responsibility of conducting the monitoring and evaluation varied depending on the  
54 context and funding available, with external evaluation being seen as favourable if it could be funded.  
55 The government and international organisations relied heavily on monitoring and evaluation for  
56 making decisions about the collaborations. However, it was seen as hard to move beyond pure outputs,  
57 with quantitative indicators believed to be most reliable, and to attribute successes or failures to  
58 different stakeholders in the collaboration.  
59  
60

1  
2  
3 Dissemination of the collaboration and its activities were primarily thought of as information  
4 spreading, trying to raise awareness of the identified problem and engage the public and relevant  
5 stakeholders at national and international level in the efforts to solve it. It was also deemed important  
6 as a means of ensuring recognition from national level government ministries or the international  
7 community for the work done.  
8  
9

10 *“We shared a lot, especially early childhood development program. We shared at provincial level and*  
11 *national committee on children education. We invited those committees to see our target location and*  
12 *our work. So, we disseminated a lot.”* Nr 22, non-governmental organisation.  
13

#### 14 Real-world complexities shaping the collaboration

15  
16 There were a range of aspects influencing the process, often challenging the idea of a step-by-step  
17 linear approach of the collaboration. The most prominent aspect throughout was the funding,  
18 interviewees described the budget as the greatest limitation to the collaboration and called for more  
19 governmental funding at the national and sub-national level for multisectoral collaborations. Funding  
20 was seen as the most important source of power in the collaboration. Leadership roles, agenda setting  
21 and decision-making were mostly done by the organisation that controlled the funding.  
22  
23

24  
25 *“More importantly, we need the money to be available at sub-national level. The partners are all*  
26 *institutions. If the government can’t manage to work on everything, we can ask civil society to help*  
27 *working on that. Nowadays, we are sceptical with NGOs. But, we also have example of government*  
28 *providing budget for NGOs to work.”* Nr 4, governmental organisation.  
29

30  
31 Relationships between the collaborators could facilitate or hamper the collaboration, with tensions  
32 between non-governmental organisations and the government existing and at the same time conflicts  
33 between government ministries or civil society networks that added complexity. For this reason, many  
34 collaborations tried to actively build relationships over time particularly between coordination focal  
35 points or joint committees, seeing mutual understanding leading to trust and confidence in the  
36 collaboration.  
37  
38

39  
40 *“The collaborative work also became better. During my time at education sectors, the relationship*  
41 *between partners was going very well, and we were happy to share any documents or data.”* – Nr 23,  
42 non-governmental organisation.  
43

44  
45 *“There are many NGOs working to promote children. The government don’t even know who they are.*  
46 *Some NGOs don’t care about networking with the government too. This is the challenge according to*  
47 *my observation as a person in the middle of the two institutions. Both have their own weakness. Some*  
48 *NGOs do not know what the ministry have. For example, some NGOs do not know about existing*  
49 *guideline, plan or projects to work consistently. They only focus on their own work, and not pay*  
50 *attention to what others do to work collaboratively on the topic.”* – Nr 2, governmental organisation.  
51

52  
53 Capacity building were deemed to be key for the sustainability of the collaboration and its activities,  
54 particularly at the sub-national or implementation level, although demanding significant resources and  
55 the actual method varied depending on the type of collaborations and the stakeholders involved.  
56

57  
58 *“Whenever there are requests from anyone or any organisations, we always respond and provide the*  
59 *training or sharing of experiences. We never hide our knowledge. We don’t even charge them. We do*  
60 *it from our heart and soul.”* – Nr 10, governmental organisation.



1  
2  
3 An enabling environment, particularly concerning policy and governmental direction within which the  
4 collaboration took place, were seen as being of crucial importance. The introduction and adoption of  
5 the 2030 Agenda and the Cambodia Sustainable Development Goals, sub-national plans for  
6 development and national level plans promoted the idea of multisectoral collaboration. Government  
7 ministries that actively promoted or worked in multisectoral ways or through multisectoral  
8 committees, albeit not always successful, further promoted the advantages of tackling problems in a  
9 multisectoral fashion.  
10  
11

12  
13 *“The main thing is whether or not they have the commitment to work together. When commitment on*  
14 *that occur, the work can be done easily because visions created in country and global level has already*  
15 *been created.” – Nr 17, non-governmental organisation.*  
16

#### 17 Critically assessing collaborations

18  
19 Interviewees reflected critically on their collaborations and had through experience identified some  
20 key success factors and often faced obstacles of multisectoral collaborations in Cambodia. Having clear  
21 responsibilities with agreement on division of activities, leadership from all and functioning monitoring  
22 and evaluation as well as a common vision and understanding based on continuous learning in an open  
23 environment where benefits and goals were explicit seem to be key success factors. Further, many  
24 emphasised the necessity of securing buy in, trust and commitment from all stakeholders in the  
25 collaboration from the beginning with the government having a special role in all collaborations.  
26  
27

28  
29 *“Problems always occur. To work well with each other, we need to have collaborative plan with*  
30 *everyone’s ownership. Secondly, we need to build trust and not allow any mistrust to happen.” – Nr 27,*  
31 *international organisation.*  
32

33  
34 *“We also work closely and indirectly with selected institutions which have the most power.” – Nr 3,*  
35 *governmental organisation.*  
36  
37

38  
39 Obstacles identified were lack of funding or long-term sustainability of the collaboration and its  
40 activities, with politics on sub-national and national level could mean unfavourable conditions for a  
41 collaboration or simply competing priorities or work of the stakeholders in the collaboration. There  
42 could also be a sense of a lack of accountability towards each other or the thought beneficiaries, with  
43 sometime faltering commitment to work together, lack of transparency of funds or efforts, and  
44 difficulty of attributing failures or successes.  
45  
46

47  
48 *“For instance if we are looking among 25 sub national civil society working group at the*  
49 *provincial/municipal level, there was only 50% who were active. Among these half, only 20 to 30 % who*  
50 *were very active in fulfilment of their collaborative work.” – Nr 20, non-governmental organisation.*  
51  
52

## 53 DISCUSSION

54  
55 In this study, we found that the adoption of the SDGs led to an increased perceived possibility for  
56 action and higher ambitions for child health, perpetuating child health as a multisectoral issue. Further,  
57 there seem to be a gap between the desired step-by-step theory of conducting multisectoral  
58 collaboration and the real-world complexities of conducting such collaborations for child health in  
59  
60

1  
2  
3 Cambodia. This is the first study to provide in-country insights that can be transferable on multisectoral  
4 collaborations for child health, overcoming some of the key methodological gaps noted by Glandon et  
5 al.[31] including describing power dynamics, type of governance arrangements and a diversity of  
6 stakeholder experiences.  
7  
8  
9

10  
11 The expanded view of child health and higher ambition for children to thrive led to a more compelling  
12 case for multisectoral collaborations to have a collaborative advantage over single-sector or single-  
13 stakeholder efforts. The 2030 Agenda and the SDGs influence social norms at a global, country,  
14 organisational and individual level.[32] The widespread knowledge of the overarching ambition and  
15 content of the SDGs in our study serve to exemplify the notion of universality of the 2030 Agenda, and  
16 the normative significance of universality in a country context.[33] Further, the perceived high  
17 ambition of the SDGs, the diversity of topics covered in the SDGs and their interlinked nature might  
18 shift norms to be more favourable towards multisectoral collaboration, in line with Huxam's theory of  
19 collaboration advantage.[34] Placing children firmly in the centre of the SDGs in Cambodia might also  
20 allow for a re-vitalization of action and enable policy makers and practitioners to utilise the  
21 interlinkages within the SDGs to build multisectoral collaboration for child health.[35,36]  
22  
23  
24  
25  
26  
27

28  
29 Multisectoral collaborations depicted by the participants in this study showcase that there is often no  
30 linear process but rather ongoing non-linear flow of activities that intentionally lead to a multisectoral  
31 collaboration. The rational logic of inquiry theory whereby one step lead to the next one until a decision  
32 is made and action is implemented and evaluated originally proposed by Dewey[37] were perceived  
33 by the participants to be the desired theory or process of collaboration. However as showcased by  
34 Kuruvilla and Dorstoewitz[38] previously, the collaborations described somewhat mimic the  
35 multisectoral collaboration model[20] which rests on dynamic networks and changing contexts. In our  
36 study, participants singled out funding as an enabler and obstacle as well as a significant source of  
37 power in multisectoral collaborations. As noted by Rasanathan et al.[39] if multisectoral collaborations  
38 for health are to succeed appropriate financing systems that incentivise these collaborations must be  
39 in place, and the multisectoral monitoring and evaluation mechanisms allow for accountability.  
40 Conflicting perspectives between stakeholders, particularly government and non-governmental  
41 stakeholders, has been documented in Cambodia[25,26,40,41] and in other settings [42,43]. In our  
42 study there was a difference between interviewees from governmental organisations versus those  
43 from non-governmental particularly concerning the commitment and ability of the government to  
44 support and participate in multisectoral collaborations for child health. Although exploring this  
45 potential conflict was not the aim of this study, the emphasis of the participants on explicit and implicit  
46 territory feelings, hierarchies and power dynamics at a national and sub-national level in Cambodia  
47 strengthen the need to include these concepts in collaborative theory and when designing  
48 multisectoral collaborations.[44,45]  
49  
50  
51  
52  
53  
54  
55

56  
57 Our limitations include that the purposive sampling led to selection bias in the recruitment of  
58 participants. As illustrated in Table 1, the interviewees were slightly unbalanced in terms of gender  
59 and expertise in SDG areas. Participants were asked to reflect on one or two multisectoral  
60 collaborations to inform the answers to the questions in the interview, they might have had a positive

1  
2  
3 recall bias, only including those that were successful. Given the critical assessment of the multisectoral  
4 collaborations apparent in the interviews this seem negligible, however. Lastly, intra-personal  
5 dynamics between the interviewer and the interviewee might affect the answers and follow-up  
6 questions. In our study, the interviews were conducted by SS and TC, both representing academic  
7 institutions and being knowledgeable of qualitative research methods and the political landscape of  
8 organisations in Cambodia, ideally enabling both government and non-government stakeholders to  
9 express views and perceptions freely while adding credibility to the results. Although some of the  
10 findings in this study might reflect the unique Cambodia context, we believe that overall themes and  
11 conclusions are transferable to other middle-income countries and similar settings, adding valuable  
12 evidence on how stakeholders view multisectoral collaborations in general and specifically for child  
13 health. The study was designed to accomplish high information power across the five dimensions of  
14 information power,[22] however, with a broad research question and cross-case analysis the sample  
15 size was deemed to have to be relatively large to reach satisfactory information power and theoretical  
16 saturation. Information power was further increased by use of dense sampling method (purposive and  
17 specific), applied theory in the form of established frameworks for multisectoral collaborations, and  
18 high-quality dialogue in the interviews allowing for in-depth diverse multistakeholder perspectives.  
19  
20  
21  
22  
23  
24  
25

## 26 **CONCLUSION**

27  
28 We found that stakeholders in Cambodia perceived the SDGs to inspire an expanded view on child  
29 health that enabled change and promoted multisectoral collaboration. Interviewees experienced a gap  
30 between the desired theory of conducting multisectoral collaborations for child health and the real-  
31 world complexities of engaging in such an endeavour. The findings from this in-depth study can inform  
32 policy makers and practitioners who wish to encourage and take advantage of multisectoral  
33 collaborations for accelerating the work towards achieving better health in general and child health  
34 specifically the era of the SDGs.  
35  
36  
37  
38  
39

## 40 **Contributors**

41  
42 TA, HMA and DH conceived and designed the study. TC and SS contributed to the study design and  
43 conducted the data collection. DH analysed the data together with TC, SS and HMA. DH wrote the first  
44 draft of the manuscript to which all authors (DH, TC, SS, HN SK, HMA and TA) provided critical  
45 contributions. All authors read and approved the final manuscript.  
46  
47

## 48 **Funding**

49  
50 The work was supported by the Swedish Research Council (2018-03609). The funding organisation  
51 were not involved in the manuscript's writing or the decision to submit it for publication.  
52

## 53 **Competing interests**

54  
55 None declared.  
56

## 57 **Patient and public involvement**

1  
2  
3 No patients or public representative were directly involved in the design, conduct or reporting of this  
4 study. The findings will be disseminated and discussed with involved stakeholders. A reflexivity  
5 statement can be found in the **Supplementary Material 2**.  
6

#### 7 **Patient consent for publication**

8  
9 Not applicable.  
10

#### 11 **Ethics approval**

12  
13 The study received ethical approval from the National Ethics Committee for Health Research in  
14 Cambodia (NECHR-023) and was exempt from ethical review from the Swedish Ethical Review  
15 Authority (Dnr 2022-00424-01). Informed consent was obtained from all participants before inclusion  
16 in the study.  
17

#### 18 **Data availability statement**

19  
20 No data is available. This is a qualitative study of a relatively small sample population in Cambodia.  
21 Making the dataset publicly available could potentially breach the privacy that was promised to  
22 participants when they agreed to take part and the ethical approvals granted. Therefore, the authors  
23 will not make the full transcripts available to a wider audience.  
24  
25  
26  
27  
28  
29  
30

#### 31 **References**

- 32  
33 1 Independent Accountability Panel. Caught in the COVID-19 storm: women's, children's, and  
34 adolescents' health in the context of UHC and the SDGs. Geneva: 2020.  
35 [https://iapewec.org/wp-content/uploads/2020/12/IAP-2020-Report\\_web-sp.pdf](https://iapewec.org/wp-content/uploads/2020/12/IAP-2020-Report_web-sp.pdf)  
36  
37 2 United Nations. The Sustainable Development Goals Report. New York: 2022.  
38 [https://unstats.un.org/sdgs/report/2022/The-Sustainable-Development-Goals-Report-](https://unstats.un.org/sdgs/report/2022/The-Sustainable-Development-Goals-Report-2022.pdf)  
39 [2022.pdf](https://unstats.un.org/sdgs/report/2022/The-Sustainable-Development-Goals-Report-2022.pdf)  
40  
41 3 Marmot M. Achieving health equity: from root causes to fair outcomes. *Lancet*  
42 2007;**370**:1153–63. doi:10.1016/S0140  
43  
44 4 Bishai DM, Cohen R, Alfonso YN, *et al*. Factors Contributing to Maternal and Child Mortality  
45 Reductions in 146 Low-and Middle- Income Countries between 1990 and 2010. *PLoS One*  
46 2016;**11**:e0144908. doi:10.1371/journal.pone.0144908  
47  
48 5 Every Woman Every Child. The global strategy for women's children's and adolescents' health  
49 (2016-2030). New York: 2015.  
50  
51 6 Alfvén T, Dahlstrand J, Humphreys D, *et al*. Placing children at the center of the Sustainable  
52 Development Report: A SIGHT – Swedish Society of Medicine Road Map on Global Child  
53 Health. Stockholm: 2019.  
54  
55 7 Lawn JE, Rohde J, Rifkin S, *et al*. Alma-Ata 30 years on: revolutionary, relevant, and time to  
56 revitalise. *Lancet (British Ed)* 2008;**372**:917–27. doi:http://dx.doi.org/10.1016/S0140-  
57 6736(08)61402-6  
58  
59 8 Organization WH. Time to deliver: report of the WHO Independent High-Level Commission on  
60 Noncommunicable Diseases. Geneva: 2018.

- 1  
2  
3 9 Rasanathan K, Damji N, Atsbeha T, *et al.* Ensuring multisectoral action on the determinants of  
4 reproductive, maternal, newborn, child, and adolescent health in the post-2015 era. *BMJ*  
5 2015;**351**:h4213. doi:10.1136/bmj.h4213  
6  
7 10 Levinson FJ, Balarajan Y, Marini A. Addressing malnutrition multisectorally. What have we  
8 learned from recent international experience? New York: 2013.  
9  
10 11 Lo S, Das P, Horton R. A good start in life will ensure a sustainable future for all. *Lancet*  
11 2017;**389**:8–9. doi:10.1016/S0140-6736(16)31774-3  
12  
13 12 Neuman MJ, Devercelli AE. What matters most for early childhood development? A  
14 framework paper. Systems Approach for Better Education Results (SABER) working paper  
15 series. Washington: 2013.  
16  
17 13 Blomstedt Y, Bhutta ZA, Dahlstrand J, *et al.* Partnerships for child health: capitalising on links  
18 between the sustainable development goals. *BMJ* 2018;**360**:k125. doi:10.1136/BMJ.K125  
19  
20 14 Kuruvilla S, Schweitzer J, Bishai D, *et al.* Policy and Practice: Success factors for reducing  
21 maternal and child mortality. *Bull World Heal Organ* 2014;**92**:533–44.  
22 doi:10.2471/BLT.14.138131  
23  
24 15 Ahmed SM, Rawal LB, Chowdhury SA, *et al.* Cross-country analysis of strategies for achieving  
25 progress towards global goals for women’s and children’s health. *Bull World Health Organ*  
26 2016;**94**:351–61. doi:10.2471/BLT.15.168450  
27  
28 16 UNICEF. Child Poverty in Cambodia Summary Report. Phnom Penh: 2018.  
29  
30 17 Kaba MW, Baesel K, Poch B, *et al.* IDPoor: a poverty identification programme that enables  
31 collaboration across sectors for maternal and child health in Cambodia. *BMJ* 2018;**363**:k4698.  
32 doi:10.1136/bmj.k4698  
33  
34 18 UNICEF. Reducing Stunting in Children Under Five Years of Age: A Comprehensive Evaluation  
35 of UNICEF’s Strategies and Programme Performance – Cambodia Country Case Study. New  
36 York: 2017.  
37  
38 19 Royal Government of Cambodia. Cambodian Sustainable Development Goals (CSDGs)  
39 Framework (2016-2030). Phnom Penh: 2018.  
40  
41 20 Kuruvilla S, Hinton R, Boerma T, *et al.* Business not as usual: how multisectoral collaboration  
42 can promote transformative change for health and sustainable development. *BMJ*  
43 2018;**363**:k4771. doi:10.1136/bmj.k4771  
44  
45 21 Tong A, Sainsbury P, Craig J. Consolidated criteria for reporting qualitative research: A 32-item  
46 checklist for interviews and focus groups. *Int J Qual Heal Care* 2018;**19**:349–57.  
47  
48 22 Malterud K, Siersma VD, Guassora AD. Sample Size in Qualitative Interview Studies: Guided by  
49 Information Power. *Qual Health Res* 2016;**26**:1753–60. doi:10.1177/1049732315617444  
50  
51 23 Bertelsmann Stiftung. BTI 2022 Country Report — Cambodia. 2022.  
52  
53 24 Royal Government of Cambodia. National Program for Sub-National Democratic  
54 Development. Phnom Penh: 2010.  
55  
56 25 Un K. *Cambodia: Return to Authoritarianism*. Cambridge University Press 2019.  
57  
58 26 Frewer T. Doing NGO Work: the politics of being ‘civil society’ and promoting ‘good  
59 governance’ in Cambodia. *Aust Geogr* 2013;**44**:97-114,. doi:10.1080/00049182.2013.765350  
60  
27 International Council for Science. A guide to SDG interactions: from science to

- 1  
2  
3 implementation. Paris: 2017.
- 4  
5 28 World Health Organization. Health in all policies: Helsinki statement. Framework for country  
6 action. Geneva: 2014.
- 7  
8 29 Gale N, Heath G, Cameron E, *et al*. Using the framework method for the analysis of qualitative  
9 data in multi-disciplinary health research. *BMC Med Res Methodol* 2013, 2013;**13**:260–1.
- 10  
11 30 Malterud K. Theory and interpretation in qualitative studies from general practice: Why and  
12 how? *Scand J Public Health* 2016;**44**:120–9. doi:10.1177/1403494815621181
- 13  
14 31 Glandon D, Mondal S, Okeyo I, *et al*. Methodological gaps and opportunities for studying  
15 multisectoral collaboration for health in low- and middle-income countries. *Health Policy Plan*  
16 2019;**34**:ii7–17. doi:10.1093/heapol/czz116
- 17  
18 32 Schmieg G, Meyer E, Schrickel I, *et al*. Modeling normativity in sustainability: a comparison of  
19 the sustainable development goals, the Paris agreement, and the papal encyclical. *Sustain Sci*  
20 2018;**13**:785–96. doi:10.1007/s11625-017-0504-7
- 21  
22 33 Long G. The idea of universality in the sustainable development goals. *Ethics Int Aff*  
23 2015;**29**:203–22. doi:10.1017/S0892679415000076
- 24  
25 34 Huxham C. Theorizing collaboration practice. *Public Manag Rev* 2003;**5**:401–23.  
26 doi:10.1080/1471903032000146964
- 27  
28 35 Alfvén T, Dahlstrand J, Humphreys D, *et al*. Placing children and adolescents at the centre of  
29 the Sustainable Development Goals will deliver for current and future generations. *Glob*  
30 *Health Action* 2019;**12**:1670015. doi:10.1080/16549716.2019.1670015
- 31  
32 36 Clark H, Coll-seck AM, Banerjee A, *et al*. The Lancet Commissions A future for the world ' s  
33 children ? A WHO – UNICEF – Lancet Commission. *Lancet* 2020;**395**:605–58.  
34 doi:10.1016/S0140-6736(19)32540-1
- 35  
36 37 Dewey J. *Logic: The Theory of Inquiry*. New York: : Holt, Rinehart and Winston 1938.
- 37  
38 38 Kuruvilla S, Dorstewitz P. There is no 'point' in decision-making: A model of transactive  
39 rationality for public policy and administration. *Policy Sci* 2010;**43**:263–87.  
40 doi:10.1007/s11077-009-9098-y
- 41  
42 39 Rasanathan K, Atkins V, Mwansambo C, *et al*. Governing multisectoral action for health in low-  
43 income and middleincome countries: An agenda for the way forward. *BMJ Glob Heal*  
44 2018;**3**:1–6. doi:10.1136/bmjgh-2018-000890
- 45  
46 40 Schröder P, Young S. *The Implications of Closing Civic Space for Sustainable Development in*  
47 *Cambodia*. Sussex: 2019.
- 48  
49 41 Norén-Nilsson A, Bourdier F. Introduction: Social Movements in Cambodia. *J Curr Southeast*  
50 *Asian Aff* 2019;**38**:3–9. doi:10.1177/1868103419848192
- 51  
52 42 Rajabi M, Ebrahimi P, Aryankhesal A. Collaboration between the government and  
53 nongovernmental organizations in providing health-care services: A systematic review of  
54 challenges. *J Educ Health Promot* 2021;**10**:1–9. doi:10.4103/jehp.jehp
- 55  
56 43 Ejaz I, Shaikh B, Rizvi N. NGOs and government partnership for health systems  
57 strengthening:A qualitative study presenting viewpoints of government, NGOs and donors in  
58 Pakistan. *BMC Health Serv Res* 2011;**11**:122. doi:https://doi.org/10.1186/1472-6963-11-122
- 59  
60 44 Faul M V. *Multi-sectoral partnerships and power*. Geneva: 2015.

1  
2  
3  
4  
5  
6  
7  
8  
9  
10  
11  
12  
13  
14  
15  
16  
17  
18  
19  
20  
21  
22  
23  
24  
25  
26  
27  
28  
29  
30  
31  
32  
33  
34  
35  
36  
37  
38  
39  
40  
41  
42  
43  
44  
45  
46  
47  
48  
49  
50  
51  
52  
53  
54  
55  
56  
57  
58  
59  
60

45 Purdy JM. Power in Collaborative Governance. *Public Adm Rev* 2012;**72**:409–17.  
doi:10.1111/j.1540-6210.2012.02525.x.A

For peer review only

# Supplementary Material 1

## Table of Contents

|                                                                                                 |          |
|-------------------------------------------------------------------------------------------------|----------|
| <b>Interview Guide .....</b>                                                                    | <b>2</b> |
| <b>Consolidated criteria for reporting qualitative studies (COREQ): 32-item checklist .....</b> | <b>6</b> |
| <b>Full coding tables .....</b>                                                                 | <b>9</b> |



## Interview Guide

**1. Background information.** Please mark and fill in the following questions on this sheet

|                                                                                                                              |                          |                          |                                                             |                          |                          |
|------------------------------------------------------------------------------------------------------------------------------|--------------------------|--------------------------|-------------------------------------------------------------|--------------------------|--------------------------|
| 1. How many years have you worked: _____                                                                                     |                          |                          |                                                             |                          |                          |
| 2. Sex <input type="checkbox"/> Female <input type="checkbox"/> Male                                                         |                          |                          |                                                             |                          |                          |
| <b>3. Education</b>                                                                                                          |                          |                          |                                                             |                          |                          |
| Highest degree: _____                                                                                                        |                          |                          |                                                             |                          |                          |
| Topic of degree: _____                                                                                                       |                          |                          |                                                             |                          |                          |
| <b>4. Work experience</b>                                                                                                    |                          |                          |                                                             |                          |                          |
| <b>Current employment</b>                                                                                                    |                          |                          |                                                             |                          |                          |
| Organization: _____ Role/Position: _____                                                                                     |                          |                          |                                                             |                          |                          |
| <b>Work experience from the following sectors (represented by Cambodia Sustainable Development Goals) - Multiple Answers</b> |                          |                          |                                                             |                          |                          |
| <b>Sectors</b>                                                                                                               | <b>Rural</b>             | <b>Urban</b>             | <b>Sectors</b>                                              | <b>Rural</b>             | <b>Urban</b>             |
| 1. Poverty/social protection                                                                                                 | <input type="checkbox"/> | <input type="checkbox"/> | 10. Income inequality                                       | <input type="checkbox"/> | <input type="checkbox"/> |
| 2. Food and nutrition                                                                                                        | <input type="checkbox"/> | <input type="checkbox"/> | 11. Sustainable cities/communities/urban planning           | <input type="checkbox"/> | <input type="checkbox"/> |
| 3. Health and well-being                                                                                                     | <input type="checkbox"/> | <input type="checkbox"/> | 12. Safe consumption and production                         | <input type="checkbox"/> | <input type="checkbox"/> |
| 4. Education                                                                                                                 | <input type="checkbox"/> | <input type="checkbox"/> | 13. Climate change                                          | <input type="checkbox"/> | <input type="checkbox"/> |
| 5. Gender equality                                                                                                           | <input type="checkbox"/> | <input type="checkbox"/> | 14. Life bellow water/ocean                                 | <input type="checkbox"/> | <input type="checkbox"/> |
| 6. Water and sanitation                                                                                                      | <input type="checkbox"/> | <input type="checkbox"/> | 15. Life on land/natural resources                          | <input type="checkbox"/> | <input type="checkbox"/> |
| 7. Energy                                                                                                                    | <input type="checkbox"/> | <input type="checkbox"/> | 16. Institutional strengthening/anti corruption/legislation | <input type="checkbox"/> | <input type="checkbox"/> |
| 8. Labor market, financial sector                                                                                            | <input type="checkbox"/> | <input type="checkbox"/> | 17. Partnerships/collaborative networks                     | <input type="checkbox"/> | <input type="checkbox"/> |
| 9. Industry and infrastructure                                                                                               | <input type="checkbox"/> | <input type="checkbox"/> | 18. Cambodia Mine/ERW free                                  | <input type="checkbox"/> | <input type="checkbox"/> |

|                                                                                                                                              |                          |                          |
|----------------------------------------------------------------------------------------------------------------------------------------------|--------------------------|--------------------------|
| Other:                                                                                                                                       | <input type="checkbox"/> | <input type="checkbox"/> |
| <b>Have you worked related to child health (both health and non-health sector)?</b> <input type="checkbox"/> Yes <input type="checkbox"/> No |                          |                          |
| <b>If yes, please describe shortly in what way:</b>                                                                                          |                          |                          |

*Thank you for providing telling us your background, we would now like to know a little bit more about your views on the topics of Sustainable Development, child health and multisectoral work in general.*

## **2. Background: Sustainable Development Goals, child health and multisectoral work**

*The 2030 Agenda and the 17 Sustainable Development Goals is a framework with a comprehensive set of goals adopted by the UN in 2015 for all countries to end poverty, protect the planet and ensure prosperity for all. These have been adapted to the Cambodia Sustainable Goals.*

2.1. What were your first thoughts/opinion when the 2030 Agenda and the Sustainable Development Goals were launched?

2.1.2. What have your organization done now in relation to the Sustainable Development Goals in Cambodia compared to what you did with the Millennium Development Goals before and? (*mode of work rather than specific activities*)

2.2. Could you please describe what you would say child health includes?

2.2.1 What age? What to you include in the term “health” when it comes to children?

2.2.2 Are there any particular aspects of the health of children that you think the health system need to take special consideration to?

2.3. How do you think actors in Cambodia contribute in supporting child health to implement the Cambodia Sustainable Development Goals?

2.4. What are the linkages/connections between child health and non-health sectors (as represented by the Cambodia Sustainable Development Goals)?

2.4.1 Please provide examples of such linkages from your current/former work or what you have observe in the society?

2.4.2 Many sectors and activities can influence child health. Which sectors do you think are most relevant for child health?

*Thank you for providing your views on these topics, now we would like to ask you some further questions on the multisectoral work around child health that you have experience from. Please*

1  
2  
3 *think of a collaboration specifically, or generally if you have experience from many different,*  
4 *between two or more sectors that had the explicit goal to in some way increase child health and*  
5 *well-being.*  
6  
7  
8

### 9 **3. Multisectoral collaboration for child health**

10 Based on the Multisectoral collaborative model and the Health in all policies approach.

#### 11 **i) Drive change/Establishing the need for multisectoral work**

12  
13  
14 3.1. Which organizations are your key stakeholders to work in promoting child health?

15  
16 3.1. What was it that made the partners in the collaboration identify the need for  
17 multisectoral work? How did it begin?  
18

#### 19 20 **ii) Defining the problem and constraints**

21  
22 3.2. How was the above-mentioned child health need identified, defined or framed?  
23  
24  
25

#### 26 **iii) Design of the collaboration/Planned framed action & Supportive structures and policies**

27  
28 3.3. Was there a planning process of how to conduct the multisectoral work?

29  
30 3.4. Which stakeholders were involved in planning?

31  
32 3.5. How was the work of collaboration designed to be carried out?

33  
34 3.5.1 How was the coordination organized?

35  
36 3.5.2 How was the collaboration implemented?

37  
38 3.5.3 How was the work of the collaboration financed or mobilized?

39  
40 3.5. How do you think the multisectoral work were actually implemented compared to  
41 the plan?

42  
43 3.6. Where there any supportive structures or policies in place that enabled the work to  
44 be conducted?  
45

#### 46 **iv) Capture success / Monitoring and evaluation**

47  
48 3.7. How was the multisectoral work monitored and evaluated?

49  
50 3.7.1 Was there any key indicators or markers of success monitored?

51  
52 3.7.2 How was the success or failure attributed to between the partners in the  
53 collaboration?  
54  
55

#### 56 **V) Relate / Facilitate assessment and engagement & Build capacity**

57  
58 3.8. How did the relationship between the partners evolve during the multisectoral  
59 work?  
60

1  
2  
3 3.9. Did the collaborating partners make any effort to improve their relationship?  
4

5 3.10. Where there any efforts to engage with a wider group of actors or the public in the  
6 work?  
7

8 4. Where there any type of capacity building activities included in the collaboration?  
9  
10

11  
12 **Final questions**

13 **5.1.** What are your suggestions and recommendations in order to improve multisectoral  
14 collaboration to promote child health?  
15

16 **5.2.** Are there any end points you want to add on any of the topics touched upon today or that  
17 we have not spoken about?  
18  
19  
20  
21  
22  
23  
24  
25  
26  
27  
28  
29  
30  
31  
32  
33  
34  
35  
36  
37  
38  
39  
40  
41  
42  
43  
44  
45  
46  
47  
48  
49  
50  
51  
52  
53  
54  
55  
56  
57  
58  
59  
60

## Consolidated criteria for reporting qualitative studies (COREQ): 32-item checklist

| No.                                     | Item                                     | Description                                                                                                                                                                                                                                                                          | Page |
|-----------------------------------------|------------------------------------------|--------------------------------------------------------------------------------------------------------------------------------------------------------------------------------------------------------------------------------------------------------------------------------------|------|
| Domain 1: Research team and reflexivity |                                          |                                                                                                                                                                                                                                                                                      |      |
| Personal characteristics                |                                          |                                                                                                                                                                                                                                                                                      |      |
| 1                                       | Interviewer/facilitator                  | SS and TC conducted the interviews                                                                                                                                                                                                                                                   | 4    |
| 2                                       | Credentials                              | DH has a MD, SS has PhD, TC has MD and has a Master of Arts in Health Social Sciences, HN has a PhD, KR has a PhD, HMA has a PhD and TA has a PhD.                                                                                                                                   | 1    |
| 3                                       | Occupation                               | DH was a PhD candidate, SS was a lecturer at the Royal University of Phnom Penh, TC was a program manager at Malaria Consortium Cambodia.                                                                                                                                            | 1    |
| 4                                       | Gender                                   | All interviewers were male.                                                                                                                                                                                                                                                          | NA   |
| 5                                       | Experience and training                  | The researchers (SS and TC) had extensive experience of qualitative interviews from previous research in Cambodia.                                                                                                                                                                   | 16   |
| Relationship with participants          |                                          |                                                                                                                                                                                                                                                                                      |      |
| 6                                       | Relationship established                 | No relationship was established prior to study commencement.                                                                                                                                                                                                                         | 16   |
| 7                                       | Participant knowledge of the interviewer | In some instances, the participant recognized the interviewer from attending similar events/workshops/seminars but in general the participants did not know the interviewers. They did not know the personal goals or reasons for doing the research for the individual interviewer. | 16   |
| 8                                       | Interviewer characteristics              | The interviewers were all interested in the topic in general and had expertise in child health in Cambodia.                                                                                                                                                                          | 4    |
| Domain 2: Study design                  |                                          |                                                                                                                                                                                                                                                                                      |      |

| Theoretical framework |                                       |                                                                                                                                                                                                                                                                                                               |     |
|-----------------------|---------------------------------------|---------------------------------------------------------------------------------------------------------------------------------------------------------------------------------------------------------------------------------------------------------------------------------------------------------------|-----|
| 9                     | Methodological orientation and theory | The methodological orientation of the study is content analysis, specifically framework analysis.                                                                                                                                                                                                             | 4   |
| Participant selection |                                       |                                                                                                                                                                                                                                                                                                               |     |
| 10                    | Sampling                              | Participants were purposively selected based on predefined criteria of having expertise in child health or being from a non-health sector (for example water and sanitation, agriculture, infrastructure etc.) but with implementation knowledge of how that sector interacts with other sectors in Cambodia. | 4   |
| 11                    | Method of approach                    | Participants were approached via email and telephone.                                                                                                                                                                                                                                                         | NA  |
| 12                    | Sample size                           | 29 participated in the interviews.                                                                                                                                                                                                                                                                            | 4   |
| 13                    | Non-participation                     | No participants refused or dropped out.                                                                                                                                                                                                                                                                       | 4   |
| Setting               |                                       |                                                                                                                                                                                                                                                                                                               |     |
| 14                    | Setting of data collection            | The interviews took place either virtually (over online meeting) or face to face, at a time and place convenient of the participant.                                                                                                                                                                          | 4   |
| 15                    | Presence of non-participants          | There were no non-participants present during the interviews.                                                                                                                                                                                                                                                 | 4   |
| 16                    | Description of sample                 | The description of the sample can be seen in Table 1 in the article.                                                                                                                                                                                                                                          | 5   |
| Data collection       |                                       |                                                                                                                                                                                                                                                                                                               |     |
| 17                    | Interview guide                       | This is provided in the supplementary material 1. The interview guide was piloted before the study began.                                                                                                                                                                                                     | 4-5 |
| 18                    | Repeat interviews                     | No repeat interviews were held.                                                                                                                                                                                                                                                                               | NA  |
| 19                    | Audio/visual recording                | Audio recording was used to collect the data.                                                                                                                                                                                                                                                                 | 4   |
| 20                    | Field notes                           | No field notes were taken.                                                                                                                                                                                                                                                                                    | 4   |
| 21                    | Duration                              | The duration of the interviews ranged from 45 minutes to 1 hr and 15 minutes                                                                                                                                                                                                                                  | NA  |

|                                 |                                |                                                                                 |       |
|---------------------------------|--------------------------------|---------------------------------------------------------------------------------|-------|
| 22                              | Data saturation                | Is discussed with regards to information power in the article.                  | 16    |
| 23                              | Transcripts returned           | Transcripts were not returned to participants.                                  | NA    |
| Domain 3: Analysis and findings |                                |                                                                                 |       |
| Data analysis                   |                                |                                                                                 |       |
| 24                              | Number of data coders          | DH coded the data                                                               | 8     |
| 25                              | Description of the coding tree | Is presented in Table 2 in the manuscript and supplementary material 1.         | 9     |
| 26                              | Derivation of themes           | The themes were derived from the data.                                          | 8     |
| 27                              | Software                       | Nvivo software were used for the coding.                                        | 8     |
| 28                              | Participant checking           | The participants did not provide feedback on the findings.                      | NA    |
| Reporting                       |                                |                                                                                 |       |
| 29                              | Quotations presented           | Quotations presented with each paragraph, trying to illustrate the main points. | 10-14 |
| 30                              | Data and findings consistent   | The data and findings were cross-checked multiple times, ensuring consistency.  | 16    |
| 31                              | Clarity of major themes        | Outlined in result table and in clear headings in the result section.           | 9-14  |
| 32                              | Clarity of minor themes        | Outlined in result table and in clear headings in the result section.           | 9-14  |

## Full coding tables

### Main themes and findings - full coding tables

|                      |                                                       |                                           |                                                          |                                                         |
|----------------------|-------------------------------------------------------|-------------------------------------------|----------------------------------------------------------|---------------------------------------------------------|
| <b>Theme</b>         | SDGs and expanded view on child health enable change  |                                           |                                                          |                                                         |
| <b>Sub-themes</b>    | Possibility for action due to SDGs                    |                                           |                                                          |                                                         |
| <b>Categories</b>    | Government commitment to and leadership of SDGs       | SDGs provide a common vision and guide    |                                                          | Discrepancy between ambition and actual work            |
| <b>Subcategories</b> |                                                       | More detailed than MDGs                   | Showcase that health is a multisectoral issue            |                                                         |
| <b>Codes</b>         | Adoption and change of national plans and policies    | Provide a clear set of goals              | Illustrate that health is a multisectoral issue          | SDGs too complex, impossible to succeed                 |
|                      | No change in government as leaders of the goals       | Provide a roadmap or guide                | SDGs reflecting actual conditions with regards to health | High ambition not matched with resources/work committed |
|                      | SDG implementation depends on alignment to government | More detailed                             |                                                          |                                                         |
|                      |                                                       | More complex reflecting actual conditions |                                                          |                                                         |



1  
2  
3  
4  
5  
6  
7  
8  
9  
10  
11  
12  
13  
14  
15  
16  
17  
18  
19  
20  
21  
22  
23  
24  
25  
26  
27  
28  
29  
30  
31  
32  
33  
34  
35  
36  
37  
38  
39  
40  
41  
42  
43  
44  
45  
46

Main themes and findings - full coding tables, continued.

|                       |                                                                    |                                                                                           |                                                                                                            |                                                                                                                               |                                                                                                                                         |                                                                                                                 |
|-----------------------|--------------------------------------------------------------------|-------------------------------------------------------------------------------------------|------------------------------------------------------------------------------------------------------------|-------------------------------------------------------------------------------------------------------------------------------|-----------------------------------------------------------------------------------------------------------------------------------------|-----------------------------------------------------------------------------------------------------------------|
| <b>Themes</b>         | SDGs and expanded view on child health enable change               |                                                                                           |                                                                                                            |                                                                                                                               |                                                                                                                                         |                                                                                                                 |
| <b>Sub-themes</b>     | Higher ambitions for child health, a multisectoral area at heart   |                                                                                           |                                                                                                            |                                                                                                                               |                                                                                                                                         |                                                                                                                 |
| <b>Categories</b>     | Definition of child health                                         |                                                                                           | Child health linkages across sectors                                                                       |                                                                                                                               |                                                                                                                                         |                                                                                                                 |
| <b>Sub-categories</b> | Child age under 18 years                                           | A focus on not only health but well-being                                                 | Child health by definition a multisectoral issue                                                           | Education and schooling                                                                                                       | Nutrition                                                                                                                               | General societal conditions                                                                                     |
| <b>Codes</b>          | General view and legally a child is a person under 18 years of age | Physical and mental health equally important<br><br>Good nutrition and absence of disease | All SDGs important for child health<br><br>The linkages between sectors and child health cannot be divided | Education as most formative experience<br><br>School important physical place for linkages<br><br>Early child development key | Nutrition and functioning agricultural sector as basis for child growth<br><br>Commercial interests conflicts with good child nutrition | Physical safety and hygiene environment<br><br>Economic development of country<br><br>Social protection systems |

## Main themes and findings - full coding tables, continued.

|                       |                                                                     |                                                                |                                                         |                                                 |                              |
|-----------------------|---------------------------------------------------------------------|----------------------------------------------------------------|---------------------------------------------------------|-------------------------------------------------|------------------------------|
| <b>Theme</b>          | SDGs and expanded view on child health enable change                |                                                                |                                                         |                                                 |                              |
| <b>Sub-themes</b>     | Higher ambitions for child health, a multisectoral area at heart    |                                                                |                                                         |                                                 |                              |
| <b>Categories</b>     | Aspects of the health system and actors unique to children          |                                                                |                                                         | Special considerations for children             |                              |
| <b>Sub-categories</b> | Responsibility of family and community                              | Influence of other actors                                      | Key aspects of health system for improving child health | Life course approach                            | Enabling the child to thrive |
| <b>Codes</b>          | Parents and family are the primary caretaker                        | Government overarching leader and supporter of child health    | Lack of focus on preventive child health measures       | Prenatal services important for child health    | A focus on child growth      |
|                       | Information and health literacy key undertaking                     | International organizations influence organizations in country | Need to improve quality and equity                      | Children have different needs at different ages | Holistic approach            |
|                       | Social determinants of family dictates child health to large extent | Commercial interests of private sector                         | Difference between rural and urban areas                |                                                 | Acknowledging child rights   |

1  
2  
3  
4  
5  
6  
7  
8  
9  
10  
11  
12  
13  
14  
15  
16  
17  
18  
19  
20  
21  
22  
23  
24  
25  
26  
27  
28  
29  
30  
31  
32  
33  
34  
35  
36  
37  
38  
39  
40  
41  
42  
43  
44  
45  
46

Main themes and findings - full coding tables, continued.

|                       |                                                |                                                     |                                                     |                                                        |                                                                 |                                             |
|-----------------------|------------------------------------------------|-----------------------------------------------------|-----------------------------------------------------|--------------------------------------------------------|-----------------------------------------------------------------|---------------------------------------------|
| <b>Theme</b>          | Gap between theory and real world complexities |                                                     |                                                     |                                                        |                                                                 |                                             |
| <b>Sub-themes</b>     | Linear process of collaboration                |                                                     |                                                     |                                                        |                                                                 |                                             |
| <b>Categories</b>     | Actors and topics                              |                                                     |                                                     | Identifying and framing problem                        |                                                                 |                                             |
| <b>Sub-categories</b> | Broad variety of actors                        | Territory feelings                                  | Collaborations focused on non-health aspects        | Top-down approach                                      | Bottom-up approach                                              | Framing of problem                          |
| <b>Codes</b>          | Government as natural leader                   | There exist strict boundaries between actors        | Focused on preventive issues                        | Government or ministries identifies need               | Listening to stakeholders in community or on sub-national level | Research as a way of narrowing problem      |
|                       | Civil society networks                         | Competition between actors for funding              | Collaboration indirectly see effect on child health | National policy or development plan                    | Routine data or findings from actual situation on the ground    | Involving many actors in collective process |
|                       | External donors emphasize importance           | Skeptical view of government and NGO and vice versa | Willingness to connect to child health              | International agenda or external funding opportunities | Reliable data not always present                                | Detailed problem statement                  |
|                       | Many different actors collaborating            |                                                     |                                                     | From own organizational strategy or values             |                                                                 |                                             |

## Main themes and findings - full coding tables, continued.

|                       |                                                                                                                                                                                                         |                                                                                                                                                                                         |                                                                                                                            |                                                                                                                                                           |                                                                                                                                                              |                                                                                                                          |                                                                                                                                                                            |
|-----------------------|---------------------------------------------------------------------------------------------------------------------------------------------------------------------------------------------------------|-----------------------------------------------------------------------------------------------------------------------------------------------------------------------------------------|----------------------------------------------------------------------------------------------------------------------------|-----------------------------------------------------------------------------------------------------------------------------------------------------------|--------------------------------------------------------------------------------------------------------------------------------------------------------------|--------------------------------------------------------------------------------------------------------------------------|----------------------------------------------------------------------------------------------------------------------------------------------------------------------------|
| <b>Theme</b>          | Gap between theory and real world complexities                                                                                                                                                          |                                                                                                                                                                                         |                                                                                                                            |                                                                                                                                                           |                                                                                                                                                              |                                                                                                                          |                                                                                                                                                                            |
| <b>Sub-themes</b>     | Linear process of collaboration                                                                                                                                                                         |                                                                                                                                                                                         |                                                                                                                            |                                                                                                                                                           |                                                                                                                                                              |                                                                                                                          |                                                                                                                                                                            |
| <b>Categories</b>     | Planning                                                                                                                                                                                                |                                                                                                                                                                                         |                                                                                                                            | Coordination                                                                                                                                              |                                                                                                                                                              |                                                                                                                          |                                                                                                                                                                            |
| <b>Sub-categories</b> | Complex, detailed, resource constraining process                                                                                                                                                        | Capacity assessment key                                                                                                                                                                 | Prioritization depending on context                                                                                        | Varied methods of coordination                                                                                                                            | Clear division of responsibilities                                                                                                                           | Leadership paramount                                                                                                     | Power and hierarchies influence coordination                                                                                                                               |
| <b>Codes</b>          | <p>Many actors involved in planning</p> <p>Sub-national and national level engaged</p> <p>Technical level and strategy level</p> <p>Detailed collaboration plan and outline of activities, outputs,</p> | <p>Technical skill and resource capacity at implementer level instrumental</p> <p>Division of activities based on capacity</p> <p>If not enough capacity collaboration cannot begin</p> | <p>Prioritization based on funding requirements</p> <p>Politics and benefits of including certain actors or activities</p> | <p>Information sharing mechanisms</p> <p>Focal points or joint committees</p> <p>Regular, continuous coordination</p> <p>Built on existing structures</p> | <p>Agreed upon plan of responsibilities</p> <p>Common vision and commitment key for ease of coordination</p> <p>Participation in joint coordination hard</p> | <p>Single organization that explicitly or implicitly lead</p> <p>Structuring collaboration efforts depends on leader</p> | <p>Focal points for collaboration lack decision making power</p> <p>Power imbalance due to government more powerful</p> <p>Competing for funding between organizations</p> |

1  
2  
3  
4  
5  
6  
7  
8  
9  
10  
11  
12  
13  
14  
15  
16  
17  
18  
19  
20  
21  
22  
23  
24  
25  
26  
27  
28  
29  
30  
31  
32  
33  
34  
35  
36  
37  
38  
39  
40  
41  
42  
43  
44  
45  
46

For peer review only

|  |                                                    |  |  |  |  |  |  |
|--|----------------------------------------------------|--|--|--|--|--|--|
|  | and desired outcomes                               |  |  |  |  |  |  |
|  | Commitment and ownership implicit goals of process |  |  |  |  |  |  |

## Main themes and findings - full coding tables, continued.

|                       |                                                 |                                                       |                                                                           |                                                                  |                                                    |                                                |                                                                    |
|-----------------------|-------------------------------------------------|-------------------------------------------------------|---------------------------------------------------------------------------|------------------------------------------------------------------|----------------------------------------------------|------------------------------------------------|--------------------------------------------------------------------|
| <b>Theme</b>          | Gap between theory and real world complexities  |                                                       |                                                                           |                                                                  |                                                    |                                                |                                                                    |
| <b>Sub-themes</b>     | Linear process of collaboration                 |                                                       |                                                                           |                                                                  |                                                    |                                                |                                                                    |
| <b>Categories</b>     | Implementation                                  |                                                       |                                                                           | Monitoring and evaluation                                        |                                                    |                                                |                                                                    |
| <b>Sub-categories</b> | Adaptability to change                          | Geographical and administrative level                 | Follows from planning and coordination                                    | Detailed but depends on funding                                  | Hard to move beyond outputs                        | Integral to the collaboration                  | Responsibility for M&E varies                                      |
| <b>Codes</b>          | Implementation does not follow plan             | Focus on implementing organizations or participations | Implementation mirrors previous collaborative efforts                     | Funding source and resources key for allowing M&E                | Discrepancy in M&E between stakeholders            | Learning from failure                          | Internal or external evaluation depending on context and resources |
|                       | Funding changes requires change of plan         | Added complexity for actual implementation            | Reduction in parallel work and efficient implementation                   | M&E include detailed indicators                                  | Particularly hard to attribute success or failures | M&E seen as opportunity to learn and improve   | One stakeholder monitors activities                                |
|                       | Government involvement lead to less flexibility | National level collaboration, sub-national implement  | Takes time and resources to implement, need to be considered before start | Government or external donor relies heavily on M&E for decisions | Quantitative indicators more favorable             | Successes can build momentum, secure resources | Joint monitoring of activities                                     |
|                       | Covid-19 disruption                             | Sub-national own system of priorities,                |                                                                           |                                                                  |                                                    | Serves as main accountability mechanism        |                                                                    |

1  
2  
3  
4  
5  
6  
7  
8  
9  
10  
11  
12  
13  
14  
15  
16  
17  
18  
19  
20  
21  
22  
23  
24  
25  
26  
27  
28  
29  
30  
31  
32  
33  
34  
35  
36  
37  
38  
39  
40  
41  
42  
43  
44  
45  
46

|  |  |                         |  |  |  |  |  |
|--|--|-------------------------|--|--|--|--|--|
|  |  | relationships and focus |  |  |  |  |  |
|--|--|-------------------------|--|--|--|--|--|

For peer review only

## Main themes and findings - full coding tables, continued.

|                       |                                                              |                                                                         |                                                                                                                                                                       |                                                                                                                                                                                   |                                                                                                                                                                     |                                                                                        |                                                                                                                                                                                |
|-----------------------|--------------------------------------------------------------|-------------------------------------------------------------------------|-----------------------------------------------------------------------------------------------------------------------------------------------------------------------|-----------------------------------------------------------------------------------------------------------------------------------------------------------------------------------|---------------------------------------------------------------------------------------------------------------------------------------------------------------------|----------------------------------------------------------------------------------------|--------------------------------------------------------------------------------------------------------------------------------------------------------------------------------|
| <b>Theme</b>          | Gap between theory and real world complexities               |                                                                         |                                                                                                                                                                       |                                                                                                                                                                                   |                                                                                                                                                                     |                                                                                        |                                                                                                                                                                                |
| <b>Sub-themes</b>     | Linear process of collaboration                              |                                                                         | Real-world complexities shaping the collaboration                                                                                                                     |                                                                                                                                                                                   |                                                                                                                                                                     |                                                                                        |                                                                                                                                                                                |
| <b>Categories</b>     | Dissemination                                                |                                                                         | Funding                                                                                                                                                               |                                                                                                                                                                                   | Relationships                                                                                                                                                       |                                                                                        |                                                                                                                                                                                |
| <b>Sub-categories</b> | Information spreading                                        | Recognition                                                             | Call for more funding                                                                                                                                                 | Funding as a source of power                                                                                                                                                      | Facilitate or hamper collaboration                                                                                                                                  | Actively building relationships                                                        | Relationships as an outcome                                                                                                                                                    |
| <b>Codes</b>          | Engage the public and stakeholders<br><br>Increase awareness | Engaging national-level government<br><br>Gain international reputation | Budget greatest limitation to collaboration<br><br>Not enough government/national funding<br><br>Funding sources varies<br><br>If government funding more sustainable | External donors agenda decide activities<br><br>If funding from government they have last say<br><br>Leadership often based on funding<br><br>Ministry of economy key stakeholder | Tensions between NGOs and government evident<br><br>Conflicts within government or NGO networks<br><br>Common understanding and relationships increase coordination | Continuous relationship building<br><br>Efforts by stakeholders to build relationships | Over time relationships built through coordination meetings and implementation<br><br>Evolve between key focal points<br><br>Mutual understanding lead to trust and confidence |



1  
2  
3  
4  
5  
6  
7  
8  
9  
10  
11  
12  
13  
14  
15  
16  
17  
18  
19  
20  
21  
22  
23  
24  
25  
26  
27  
28  
29  
30  
31  
32  
33  
34  
35  
36  
37  
38  
39  
40  
41  
42  
43  
44  
45  
46

|  |  |  |  |                                                 |  |  |  |
|--|--|--|--|-------------------------------------------------|--|--|--|
|  |  |  |  | Decide design and coordination of collaboration |  |  |  |
|--|--|--|--|-------------------------------------------------|--|--|--|

For peer review only

Main themes and findings - full coding tables, continued.

|                       |                                                   |                                                |                                               |                                                                                  |                                      |                                     |                                 |                                    |                                             |                                                 |
|-----------------------|---------------------------------------------------|------------------------------------------------|-----------------------------------------------|----------------------------------------------------------------------------------|--------------------------------------|-------------------------------------|---------------------------------|------------------------------------|---------------------------------------------|-------------------------------------------------|
| <b>Theme</b>          | Gap between theory and real world complexities    |                                                |                                               |                                                                                  |                                      |                                     |                                 |                                    |                                             |                                                 |
| <b>Sub-themes</b>     | Real-world complexities shaping the collaboration |                                                |                                               |                                                                                  |                                      | Critically assessing collaborations |                                 |                                    |                                             |                                                 |
| <b>Categories</b>     | Enabling environment                              |                                                | Capacity building                             |                                                                                  |                                      | Success factors                     |                                 |                                    | Obstacles                                   |                                                 |
| <b>Sub-categories</b> | Policies                                          | Government                                     | Actual method depends on collaboration        | Key for sustainability                                                           | Demands resources                    | Clear responsibilities              | Common vision and understanding | Secure buy in                      | Real world complexities                     | Lack of accountability                          |
| <b>Codes</b>          | International agenda facilitate work              | Active and collaborative government ministries | In person technical capacity building         | Learning and incorporating changes                                               | Capacity building takes time         | Agreement on division of activities | Learning continuously           | Engage stakeholders from beginning | Lack of funding, sustainability             | No commitment to work together                  |
|                       | Sub-national plans for development                | Existing multisectoral ministerial committees  | Natural reciprocal                            | Integral part of collaboration itself, one of main benefits                      | Capacity building limited by funding | Leadership from all                 | Open sharing and discussion     | Government and sustainable funding | Politics on sub-national and national level | Lack of transparency                            |
|                       | National CSDG roadmap and other national plans    |                                                | Effort to include capacity building           | Building capacity with implementors or sub/national level lead to sustainability |                                      | Functioning M&E                     | Benefits and goals explicit     | Commitment from all                | Competing priorities and work               | Difficulty of attributing failures or successes |
|                       |                                                   |                                                | Capacity building according to administrative |                                                                                  |                                      |                                     |                                 | Relationship and capacity building |                                             |                                                 |

1  
2  
3  
4  
5  
6  
7  
8  
9  
10  
11  
12  
13  
14  
15  
16  
17  
18  
19  
20  
21  
22  
23  
24  
25  
26  
27  
28  
29  
30  
31  
32  
33  
34  
35  
36  
37  
38  
39  
40  
41  
42  
43  
44  
45  
46

|  |  |  |                              |  |  |  |  |  |  |  |
|--|--|--|------------------------------|--|--|--|--|--|--|--|
|  |  |  | and<br>geographical<br>level |  |  |  |  |  |  |  |
|--|--|--|------------------------------|--|--|--|--|--|--|--|

For peer review only

## Supplementary Material 2. Reflexivity Statement

### Study conceptualisation:

1. How does this study address local research and policy priorities?

This study is a part of an effort to provide country specific knowledge of multisectoral collaborations in Cambodia, a key knowledge gap identified by stakeholders and academia. The government and other organizations are actively engaging in multisectoral collaborations, and understanding how the function in practice is a key priority.

2. How were local researchers involved in study design?

The local researchers (SS and TC) were engaged in the overall design of the study and particularly the identification and recruitment of participants as well as development of the interview guides and data collection. They were core members of the study team.

### Research management:

1. How has funding been used to support the local research team(s)?

The study was funded through the Swedish Research Council (2018-03609) with the majority of funding dedicated to country study activities and local research colleagues (SS and TC).

### Data acquisition and analysis:

1. How are research staff who conducted data collection acknowledged?

The researchers who conducted data collection met the authorship criteria and are hence acknowledged as co-authors of the study.

2. How have members of the research partnership been provided with access to study data?

All members of the research team, including SS and TC, had full access to the data.

3. How were data used to develop analytical skills within the partnership?

The qualitative data analysis was conducted by DH with input and training of DH, SS and TC by a qualitative research expert (HMA).

### Data interpretation:

1. How have research partners collaborated in interpreting study data?

The results from the study were continuously discussed with the local research colleagues (SS and TC) who contributed significantly to the interpretation of the results.

### Drafting and revising for intellectual content:

1. How were research partners supported to develop writing skills?

Most of the writing of the manuscript was done by DH, however local research colleagues (SS and TC) provided crucial input.

1  
2  
3  
4  
5  
6  
7  
8  
9  
10  
11  
12  
13  
14  
15  
16  
17  
18  
19  
20  
21  
22  
23  
24  
25  
26  
27  
28  
29  
30  
31  
32  
33  
34  
35  
36  
37  
38  
39  
40  
41  
42  
43  
44  
45  
46  
47  
48  
49  
50  
51  
52  
53  
54  
55  
56  
57  
58  
59  
60

2. How will research products be shared to address local needs?

The results from the study will be disseminated widely to an international and national audience, including a dissemination seminar with relevant country stakeholders.

#### **Authorship:**

1. How is the leadership, contribution and ownership of this work by LMIC researchers recognized within the authorship?

The local researchers (SS and TC) authors 2-3, recognizing their crucial hands-on contribution to the study.

2. How have early career researchers across the partnership been included within the authorship team?

The first author is a PhD student (although not from a LMIC), SS and TC are recognized experienced researchers.

3. How has gender balance been addressed within the authorship?

Out of the seven authors, four are male (DH, SS, TC and TA) while three (HN, SK and HMA) are female. The preponderance for male authors is weighted against the critical study design and interpretation by HN and SK while HMA is a world-leading qualitative expert.

#### **Training:**

1. How has the project contributed to training of LMIC researchers?

The LMIC researchers (SS and TC) are experienced qualitative researchers, however within this study all authors gained refresher trainings and developed their qualitative analytical skills and knowledge of framework method analysis by HMA (qualitative expert).

#### **Infrastructure:**

1. How has the project contributed to improvements in local infrastructure?

No direct benefit in local infrastructure has come from this qualitative study, however the findings of the study can help to conceptualize and form partnerships across sectors that can lead to improvements in infrastructure.

#### **Governance:**

1. What safeguarding procedures were used to protect local study participants and researchers?

The study conforms to the Helsinki declaration and followed the ethical and practical guidelines stipulated by the National Ethics Committee for Health Research in Cambodia regarding the safety of researchers and participants.

## Sustainable development goals and multisectoral collaborations for child health in Cambodia: a qualitative interview study with key child health stakeholders

### Consolidated criteria for reporting qualitative studies (COREQ): 32-item checklist

| No.                                     | Item                     | Description                                                                                                                                        | Page |
|-----------------------------------------|--------------------------|----------------------------------------------------------------------------------------------------------------------------------------------------|------|
| Domain 1: Research team and reflexivity |                          |                                                                                                                                                    |      |
| Personal characteristics                |                          |                                                                                                                                                    |      |
| 1                                       | Interviewer/facilitator  | SS and TC conducted the interviews                                                                                                                 | 4    |
| 2                                       | Credentials              | DH has a MD, SS has PhD, TC has MD and has a Master of Arts in Health Social Sciences, HN has a PhD, KR has a PhD, HMA has a PhD and TA has a PhD. | 1    |
| 3                                       | Occupation               | DH was a PhD candidate, SS was a lecturer at the Royal University of Phnom Penh, TC was a program manager at Malaria Consortium Cambodia.          | 1    |
| 4                                       | Gender                   | All interviewers were male.                                                                                                                        | NA   |
| 5                                       | Experience and training  | The researchers (SS and TC) had extensive experience of qualitative interviews from previous research in Cambodia.                                 | 16   |
| Relationship with participants          |                          |                                                                                                                                                    |      |
| 6                                       | Relationship established | No relationship was established prior to study commencement.                                                                                       | 16   |

|                        |                                          |                                                                                                                                                                                                                                                                                                               |    |
|------------------------|------------------------------------------|---------------------------------------------------------------------------------------------------------------------------------------------------------------------------------------------------------------------------------------------------------------------------------------------------------------|----|
| 7                      | Participant knowledge of the interviewer | In some instances, the participant recognized the interviewer from attending similar events/workshops/seminars but in general the participants did not know the interviewers. They did not know the personal goals or reasons for doing the research for the individual interviewer.                          | 16 |
| 8                      | Interviewer characteristics              | The interviewers were all interested in the topic in general and had expertise in child health in Cambodia.                                                                                                                                                                                                   | 4  |
| Domain 2: Study design |                                          |                                                                                                                                                                                                                                                                                                               |    |
| Theoretical framework  |                                          |                                                                                                                                                                                                                                                                                                               |    |
| 9                      | Methodological orientation and theory    | The methodological orientation of the study is content analysis, specifically framework analysis.                                                                                                                                                                                                             | 4  |
| Participant selection  |                                          |                                                                                                                                                                                                                                                                                                               |    |
| 10                     | Sampling                                 | Participants were purposively selected based on predefined criteria of having expertise in child health or being from a non-health sector (for example water and sanitation, agriculture, infrastructure etc.) but with implementation knowledge of how that sector interacts with other sectors in Cambodia. | 4  |
| 11                     | Method of approach                       | Participants were approached via email and telephone.                                                                                                                                                                                                                                                         | NA |
| 12                     | Sample size                              | 29 participated in the interviews.                                                                                                                                                                                                                                                                            | 4  |
| 13                     | Non-participation                        | No participants refused or dropped out.                                                                                                                                                                                                                                                                       | 4  |
| Setting                |                                          |                                                                                                                                                                                                                                                                                                               |    |
| 14                     | Setting of data collection               | The interviews took place either virtually (over online meeting) or face to face, at a time and place convenient of the participant.                                                                                                                                                                          | 4  |
| 15                     | Presence of non-participants             | The were no non-participants present during the interviews.                                                                                                                                                                                                                                                   | 4  |
| 16                     | Description of sample                    | The description of the sample can be seen in Table 1 in the article.                                                                                                                                                                                                                                          | 5  |
| Data collection        |                                          |                                                                                                                                                                                                                                                                                                               |    |

|                                 |                                |                                                                                                           |       |
|---------------------------------|--------------------------------|-----------------------------------------------------------------------------------------------------------|-------|
| 17                              | Interview guide                | This is provided in the supplementary material 1. The interview guide was piloted before the study began. | 4-5   |
| 18                              | Repeat interviews              | No repeat interviews were held.                                                                           | NA    |
| 19                              | Audio/visual recording         | Audio recording was used to collect the data.                                                             | 4     |
| 20                              | Field notes                    | No field notes were taken.                                                                                | 4     |
| 21                              | Duration                       | The duration of the interviews ranged from 45 minutes to 1 hr and 15 minutes                              | NA    |
| 22                              | Data saturation                | Is discussed with regards to information power in the article.                                            | 16    |
| 23                              | Transcripts returned           | Transcripts were not returned to participants.                                                            | NA    |
| Domain 3: Analysis and findings |                                |                                                                                                           |       |
| Data analysis                   |                                |                                                                                                           |       |
| 24                              | Number of data coders          | DH coded the data                                                                                         | 8     |
| 25                              | Description of the coding tree | Is presented in Table 2 in the manuscript and supplementary material 1.                                   | 9     |
| 26                              | Derivation of themes           | The themes were derived from the data.                                                                    | 8     |
| 27                              | Software                       | Nvivo software were used for the coding.                                                                  | 8     |
| 28                              | Participant checking           | The participants did not provide feedback on the findings.                                                | NA    |
| Reporting                       |                                |                                                                                                           |       |
| 29                              | Quotations presented           | Quotations presented with each paragraph, trying to illustrate the main points.                           | 10-14 |
| 30                              | Data and findings consistent   | The data and findings were cross-checked multiple times, ensuring consistency.                            | 16    |
| 31                              | Clarity of major themes        | Outlined in result table and in clear headings in the result section.                                     | 9-14  |
| 32                              | Clarity of minor themes        | Outlined in result table and in clear headings in the result section.                                     | 9-14  |



# BMJ Open

## Sustainable development goals and multisectoral collaborations for child health in Cambodia: a qualitative interview study with key child health stakeholders

|                                 |                                                                                                                                                                                                                                                                                                                                                                                                                                                                                                             |
|---------------------------------|-------------------------------------------------------------------------------------------------------------------------------------------------------------------------------------------------------------------------------------------------------------------------------------------------------------------------------------------------------------------------------------------------------------------------------------------------------------------------------------------------------------|
| Journal:                        | <i>BMJ Open</i>                                                                                                                                                                                                                                                                                                                                                                                                                                                                                             |
| Manuscript ID                   | bmjopen-2023-073853.R1                                                                                                                                                                                                                                                                                                                                                                                                                                                                                      |
| Article Type:                   | Original research                                                                                                                                                                                                                                                                                                                                                                                                                                                                                           |
| Date Submitted by the Author:   | 07-Aug-2023                                                                                                                                                                                                                                                                                                                                                                                                                                                                                                 |
| Complete List of Authors:       | <p>Helldén, Daniel ; Karolinska Institutet, Department of Global Public Health<br/> Sok, Serey; Royal University of Phnom Penh, Research Office<br/> Chea, Thy; Malaria Consortium<br/> Nordenstedt , Helena; Karolinska Institute, Department of Global Public Health<br/> Kuruville, Shyama ; WHO International<br/> Alvesson, Helle; Karolinska Institutet, Department of Global Public Health<br/> Alfvén, Tobias ; Karolinska Institute, Global Public Health; Sachs ´ Children and Youth Hospital</p> |
| <b>Primary Subject Heading</b>: | Health policy                                                                                                                                                                                                                                                                                                                                                                                                                                                                                               |
| Secondary Subject Heading:      | Global health, Qualitative research, Paediatrics                                                                                                                                                                                                                                                                                                                                                                                                                                                            |
| Keywords:                       | Health policy < HEALTH SERVICES ADMINISTRATION & MANAGEMENT, Community child health < PAEDIATRICS, Organisation of health services < HEALTH SERVICES ADMINISTRATION & MANAGEMENT                                                                                                                                                                                                                                                                                                                            |
|                                 |                                                                                                                                                                                                                                                                                                                                                                                                                                                                                                             |

SCHOLARONE™  
Manuscripts



I, the Submitting Author has the right to grant and does grant on behalf of all authors of the Work (as defined in the below author licence), an exclusive licence and/or a non-exclusive licence for contributions from authors who are: i) UK Crown employees; ii) where BMJ has agreed a CC-BY licence shall apply, and/or iii) in accordance with the terms applicable for US Federal Government officers or employees acting as part of their official duties; on a worldwide, perpetual, irrevocable, royalty-free basis to BMJ Publishing Group Ltd ("BMJ") its licensees and where the relevant Journal is co-owned by BMJ to the co-owners of the Journal, to publish the Work in this journal and any other BMJ products and to exploit all rights, as set out in our [licence](#).

The Submitting Author accepts and understands that any supply made under these terms is made by BMJ to the Submitting Author unless you are acting as an employee on behalf of your employer or a postgraduate student of an affiliated institution which is paying any applicable article publishing charge ("APC") for Open Access articles. Where the Submitting Author wishes to make the Work available on an Open Access basis (and intends to pay the relevant APC), the terms of reuse of such Open Access shall be governed by a Creative Commons licence – details of these licences and which [Creative Commons](#) licence will apply to this Work are set out in our licence referred to above.

Other than as permitted in any relevant BMJ Author's Self Archiving Policies, I confirm this Work has not been accepted for publication elsewhere, is not being considered for publication elsewhere and does not duplicate material already published. I confirm all authors consent to publication of this Work and authorise the granting of this licence.

1  
2  
3 1 **Title:** Sustainable development goals and multisectoral collaborations for child health in Cambodia: a  
4  
5 2 qualitative interview study with key child health stakeholders  
6  
7  
8 3

9  
10 4 **Authors:** Daniel Helldén<sup>1\*</sup>, Serey Sok<sup>2</sup>, Thy Chea<sup>3</sup>, Helena Nordenstedt<sup>1</sup>, Shyama Kuruvilla<sup>4</sup>, Helle  
11  
12 5 Mölsted Alvesson<sup>1</sup>, Tobias Alfvén<sup>4,5</sup>  
13  
14 6

15  
16 7 **Affiliations:**

17  
18 8 <sup>1</sup>Department of Global Public Health, Karolinska Institutet, Stockholm, Sweden

19  
20 9 <sup>2</sup>Research Office, Royal University of Phnom Penh, Phnom Penh, Cambodia

21  
22 10 <sup>3</sup>Malaria Consortium, Phnom Penh, Cambodia

23  
24 11 <sup>4</sup>World Health Organization, Geneva, Switzerland

25  
26 12 <sup>5</sup>Sachs' Children and Youth Hospital, Stockholm, Sweden  
27  
28  
29  
30 13

31  
32 14 **Corresponding author details**

33  
34 15 **Address:** Tomtebodavägen 18 A, SE-171 77 Stockholm, Sweden

35  
36 16 **Email:** daniel.hellden@ki.se

37  
38 17 **Telephone:** +46732406555  
39  
40  
41 18

42  
43 19 **Keywords:** multisectoral collaboration, health policy, child health, SDGs  
44  
45  
46 20

47  
48 21 **Number of**

49  
50 22 **Tables:** 2

51  
52 23 **Figures:** 0

53  
54 24 **Words:** 4952  
55  
56  
57 25  
58 26  
59  
60 27

## 28 Abstract

29 Objectives: Multisectoral collaboration highlighted as key in delivering on the Sustainable  
30 Development Goals (SDGs), but still little is known on how to move from rhetoric to action. Cambodia  
31 has made remarkable progress on child health over the last decades with multisectoral collaborations  
32 being a key success factor. However, it is not known how country stakeholders perceive child health in  
33 the context of the SDGs or multisectoral collaborations for child health in Cambodia.

34 Design, settings and participants: Through purposive sampling, we conducted semi-structured  
35 interviews with 29 key child health stakeholders from a range of government and non-governmental  
36 organisations in Cambodia. Guided by framework analysis, themes, sub-themes and categories were  
37 derived.

38 Results: We found that the adoption of the SDGs led to increased possibility for action and higher  
39 ambitions for child health in Cambodia, while simultaneously establishing child health as a  
40 multisectoral issue among key child stakeholders. There seem to be a discrepancy between the desired  
41 step-by-step theory of conducting multisectoral collaboration and the real-world complexities  
42 including funding and power dynamics that heavily influence the process of collaboration. Identified  
43 success factors for multisectoral collaborations included having clear responsibilities, leadership from  
44 all and trust among stakeholders while the major obstacle found was lack of sustainable funding.

45 Conclusion: The findings from this in-depth multistakeholder study can inform policy makers and  
46 practitioners in other countries on the theoretical and practical process as well as influencing aspects  
47 that shape multisectoral collaborations in general and for child health specifically. This is vital if  
48 multisectoral collaborations are to be successfully leveraged to accelerate the work towards achieving  
49 better child health in the era of the SDGs.

## 53 Strengths and limitations

- 54 - Using semi-structured interviews, diverse themes around the complex phenomenon of  
55 multisectoral collaboration for child health could be explored to reach high information power.
- 56 - The study included a relatively large sample of child health stakeholders at a national level with  
57 unique insights into multisectoral collaboration and knowledge of the Cambodian context.
- 58 - The sample participants interviewed is unbalanced in terms of gender and expertise in different  
59 SDG areas.

## 66 INTRODUCTION

67 Almost halfway until the United Nations Sustainable Development Goals (SDGs) are to be achieved,  
68 practitioners, experts and policy makers are trying to speed up the pace of progress on child health.  
69 This has become even more urgent with the setback of the COVID-19 pandemic which left 147 million  
70 children out of proper education, rising child labor and significantly higher rates of malnutrition and  
71 over 22 million children missing essential vaccinations.[1,2] Over the last decades it has become  
72 evident that progress made in other sectors heavily impact the possibility to make progress on child  
73 health and well-being.[3,4] Child survival is included in SDG 3 (Good health and well-being) while the  
74 broader aspects of child health and well-being is captured by many different SDGs, for instance SDG 2  
75 (Zero hunger), SDG 4 (Quality education) and SDG 5 (Gender equality). Further, progress on child health  
76 and well-being are essential for tackling poverty and promote the development of societies.[5] Moving  
77 beyond mere child survival, there is now a larger focus on enabling children to thrive and reach their  
78 full potential.[5,6]

79  
80 Multisectoral collaborations have long been seen as critical for achieving gains in health and well-being  
81 when it comes to universal health coverage, non-communicable diseases and succeeding in governing  
82 multisectoral issues going back to the World Health Organization (WHO) Constitution and the Alma  
83 Ata Declaration.[7–9] For child health a multisectoral approach to areas such as nutrition[10] and  
84 education[11,12] have been studied, however there is lack of understanding how multisectoral  
85 collaborations work out on a country level. Further, a generic analysis of the linkages between the  
86 SDGs and child health found that there are many synergies between making progress on the SDGs and  
87 accelerating progress on child health, suggesting that multisectoral collaboration could harness  
88 synergies and better handle tradeoffs between the SDGs and child health.[13]

89  
90 During the Millennium Development Goal era many countries made significant gains in child health,  
91 and approximately half of the reduction in child mortality between 1990 and 2010 have been  
92 attributed to investments in sectors outside of health.[14] Cambodia was one of the fast-track  
93 countries and made significant progress including succeeded in lowering the under-five mortality from  
94 116 to 29 deaths per 1000 live births from 1990 to 2015.[15] Many challenges persist however, with  
95 significant inequalities between rural and urban areas, lower than desired educational attainment and  
96 sub-optimal water and sanitation conditions in schools and residential areas.[16] It has been shown  
97 that multisectoral efforts, such as the ID Poor program, have been successful in reducing poverty and  
98 collaborative initiatives between non-health sectors have become a cornerstone of the maternal and  
99 child health strategy in Cambodia.[17–19]

100  
101 Cambodia has managed to improve the health and well-being of children over a short period of time  
102 while utilizing collaborations across sectors to do so among other changes. However, it is not known  
103 how child health stakeholders have been influenced by the SDGs or how they theorize multisectoral  
104 collaborations, here defined as “multiple sectors and stakeholder intentionally coming together and  
105 collaborating in a managed process to achieve shared outcomes and common goals”[20], versus the  
106 actual practice of conducting such collaborations. This knowledge could inform current and future

1  
2  
3 107 multisectoral collaborations on critical theories and key success factors and obstacles when initiating  
4 108 and implementing such a collaboration. Hence, our aim was to understand how stakeholders in  
5 109 Cambodia perceive the SDGs, child health in the era of the SDGs and multisectoral collaborations for  
6 110 child health in Cambodia.  
7  
8

9 111

## 10 112 **METHODS**

### 11 113 **Study design and setting**

12  
13  
14  
15 114 Guided by the The COnsolidated criteria for REporting Qualitative (COREQ) recommendations[21] and  
16 115 the concept of information power[22] this study utilizes semi-structured interviews to investigate how  
17 116 Cambodian stakeholders perceive the SDGs, the concept of child health in the era of the SDGs and  
18 117 multisectoral collaborations for child health in Cambodia. The country is governed primarily through  
19 118 the national government, which consist of the council of ministers led by the prime minister while the  
20 119 parliament (national assembly and senate) have legislative power. Administratively the country is  
21 120 divided into provinces, districts, communes and villages.[23] During the last decade, the government  
22 121 has incrementally favored a more decentralized approach where districts and commune government  
23 122 officials are given more funding and implementing power.[24] Collaboration between government and  
24 123 non-government stakeholders primarily occur on two levels, the national or sub-national (district or  
25 124 commune) level and been characterized by an increased role of the government in leading and  
26 125 coordinating collaborations.[25,26] The Ministry of Health and its National Maternal and Child Health  
27 126 Center is responsible for health services throughout Cambodia, often working in committees or  
28 127 technical groups with other relevant ministries and in collaboration with international and Cambodian  
29 128 non-governmental organisations. At the sub-national government level, provincial health departments  
30 129 and operational health districts lead the implementation of national strategies and technical guidelines  
31 130 together with national and local non-governmental organisations in a more ad-hoc fashion.  
32  
33  
34  
35  
36

37 131

### 38 39 132 **Participant identification and recruitment**

40  
41 133 Key child health stakeholders with country specific knowledge as well as non-health sector  
42 134 stakeholders on a national level in Cambodia were identified for participation by the research team.  
43 135 Participants were purposively selected based on predefined criteria of having expertise in child health  
44 136 or being from a non-health sector (for example water and sanitation, agriculture, infrastructure etc.)  
45 137 but with implementation knowledge of how child health interacts with other sectors in Cambodia.  
46 138 Efforts were made to recruit participants from many different sectors, including having participants  
47 139 from inside and outside of government. Further, the recruitment of participants was aimed to be  
48 140 balanced in terms of sex and seniority. The outreach to participants was done by DH, SS and TC through  
49 141 email and phone. The expected total number of participants was 30, balancing the need for reaching  
50 142 satisfactory information power[22] and feasibility.  
51  
52  
53

54 143

### 55 56 144 **Data collection**

57  
58 145 A total of 29 participants were interviewed between April-June 2020. Information was given verbally  
59 146 to all participants on the purpose of the study, what their involvement in the study would be, the risks  
60

1  
2  
3 147 and benefits of taking part in the study, and that they had the right to decline participation or withdraw  
4 148 from the study at any time for any reason. Participants were asked to sign an informed consent form,  
5 149 written in Khmer before the interview started. The interviews were held in Khmer by authors SS and  
6 150 TC, audio recorded and transcribed verbatim into English. The interviews took place in Phnom Penh  
7 151 city vicinity, at the participant's place of employment or other convenient but private location for the  
8 152 participant. An interview guide was developed based on established multisectoral frameworks; the  
9 153 SDG Synergies framework[27], Health in all policies approach[28] and multisectoral collaborative  
10 154 model presented by Kuruvilla et al[20] (see **Supplementary Material 1** for interview guide). The  
11 155 interview started with general background information on the participant, including the work  
12 156 experience in different sectors as represented by the Cambodian SDGs and moved on to the perception  
13 157 of the SDGs, child health and multisectoral collaboration and then focused on multisectoral  
14 158 collaboration for child health within the Cambodia context (identification of problem, design,  
15 159 implementation, and monitoring of the collaboration as well as relationships and capacity building  
16 160 activities). All types of collaborations between at least two or more sectors that had the explicit goal  
17 161 in some way to improve child health were considered during the interview. Two pilot interviews were  
18 162 held where after the interview guide was slightly adjusted for clarity.

### 163 **Data analysis**

164 Transcripts were imported into NVivo software for analysis. The transcripts were first analyzed by  
165 framework method analysis[29] by which the transcripts were read in full by DH, then coded through  
166 identification of meaning units, combining these into sub-categories and then grouped into  
167 overarching categories and lastly themes following the standard methodology. The themes, categories  
168 and sub-categories were inductively developed without prior anticipations [30] and continuously  
169 developed during the review of the transcripts. As such, the concepts of child health, SDGs and  
170 multisectoral collaboration emerged inductively. The coding was cross-checked by HMA and the  
171 analysis was continuously discussed with SS and TC to improve trustworthiness and validity.[22]

### 173 **Patient and public involvement**

174 No patients or public representative were directly involved in the design, conduct or reporting of this  
175 study. The findings will be disseminated and discussed with involved stakeholders. A reflexivity  
176 statement can be found in the **Supplementary Material 2**.

## 178 **RESULTS**

179 A diverse set of perspectives were provided by the participants (see **Table 1** for participant  
180 characteristics) on the research questions. Out of these, two main themes emerged in addition to  
181 several sub-themes and categories (**Table 2**, see **Supplementary Material 1** for full coding tables and  
182 COREQ checklist). The first theme related to the views of the participants on how the SDGs and  
183 expanded view on child health enable change the and the second main theme detailed the gap  
184 between theory and real-world complexities of conducting multisectoral collaborations for child  
185 health.

**Table 1.** Participant characteristics

| Nr | Sex    | Years worked | Organisation     | Work sector experience according to Cambodian Sustainable Development Goals |
|----|--------|--------------|------------------|-----------------------------------------------------------------------------|
| 1  | Male   | 6-14         | Governmental     | 7, 13, 14, 15                                                               |
| 2  | Female | >15          | Governmental     | 3, 5, 6                                                                     |
| 3  | Female | >15          | Governmental     | 5, 17                                                                       |
| 4  | Male   | >15          | Governmental     | 1, 3                                                                        |
| 5  | Male   | >15          | Governmental     | 3, 4, 17                                                                    |
| 6  | Female | 1-5          | Governmental     | 3, 16                                                                       |
| 7  | Male   | >15          | Governmental     | 3, 4                                                                        |
| 8  | Male   | >15          | Governmental     | 1, 2, 3, 4, 5, 6, 7, 10, 11, 12, 16, 17                                     |
| 9  | Male   | >15          | Governmental     | 3, 4, 5, 16                                                                 |
| 10 | Male   | >15          | Governmental     | 4, 17, 18                                                                   |
| 11 | Male   | >15          | Governmental     | 4, 17, 18                                                                   |
| 12 | Male   | 6-14         | Governmental     | 1, 2, 3, 6, 16                                                              |
| 13 | Female | 6-14         | Governmental     | 1, 3, 17                                                                    |
| 14 | Male   | 6-14         | Governmental     | 17, 18                                                                      |
| 15 | Male   | 6-14         | Non-governmental | 2, 3, 4, 6, 13                                                              |



|    |        |      |                  |                 |
|----|--------|------|------------------|-----------------|
| 16 | Male   | >15  | Non-governmental | 2, 3            |
| 17 | Male   | >15  | Non-governmental | 5, 10, 16, 17   |
| 18 | Male   | 6-14 | Non-governmental | 2, 3            |
| 19 | Female | 1-5  | Non-governmental | 1, 3, 4         |
| 20 | Male   | >15  | Non-governmental | 2, 4, 8         |
| 21 | Male   | >15  | Non-governmental | 16, 17          |
| 22 | Female | >15  | Non-governmental | 2, 3, 4, 6      |
| 23 | Male   | >15  | Non-governmental | 3, 4, 5, 6      |
| 24 | Female | >15  | Non-governmental | 2, 3, 5, 6      |
| 25 | Male   | >15  | Non-governmental | 1,2,3, 4, 6     |
| 26 | Male   | >15  | Non-governmental | 2, 3            |
| 27 | Male   | 6-14 | International    | 2, 3, 17        |
| 28 | Female | 6-14 | International    | 1, 2, 3, 16, 17 |
| 29 | Male   | >15  | International    | 2, 3, 4, 6, 17  |

**Footnote:** Cambodia Sustainable Development Goal 1 no poverty, 2 zero hunger, 3 child health, 4 quality education, 5 gender equality, 6 clean water and sanitation, 7 affordable and clean energy, 8 decent work and economic growth, 9 industry, innovation and infrastructure, 10 reduced inequalities, 11 sustainable cities and communities, 12 responsible consumption and production, 13 climate change, 14 life below water, 15 life on land, 16 peace, justice and strong institutions, and 18 mine/ERW free.

1  
2  
3  
4  
5  
6  
7  
8  
9  
10  
11  
12  
13  
14  
15  
16  
17  
18  
19  
20  
21  
22  
23  
24  
25  
26  
27  
28  
29  
30  
31  
32  
33  
34  
35  
36  
37  
38  
39  
40  
41  
42  
43  
44  
45  
46

**Table 2.** Main themes, sub-themes and categories

| <b>Themes</b>     | SDGs and expanded view on child health enable change                                                                                              |                                                                                                                                                                                     | Gap between theory and real-world complexities                                                                                                                           |                                                                                   |                                    |
|-------------------|---------------------------------------------------------------------------------------------------------------------------------------------------|-------------------------------------------------------------------------------------------------------------------------------------------------------------------------------------|--------------------------------------------------------------------------------------------------------------------------------------------------------------------------|-----------------------------------------------------------------------------------|------------------------------------|
| <b>Sub-themes</b> | Possibility for action due to SDGs                                                                                                                | Higher ambitions for child health, a multisectoral area at heart                                                                                                                    | Planned linear process of collaboration                                                                                                                                  | Real-world complexities shaping the collaboration                                 | Critically assessing collaboration |
| <b>Categories</b> | SDGs provide a common vision and guide<br><br>Government commitment to and leadership of SDGs<br><br>Discrepancy between ambition and actual work | Definition of child health<br><br>Child health linkages across sectors<br><br>Aspects of the health system and actors unique to children<br><br>Special considerations for children | Identifying and framing problem<br><br>Actors and topics<br><br>Planning<br><br>Coordination<br><br>Implementation<br><br>Monitoring and evaluation<br><br>Dissemination | Funding<br><br>Relationships<br><br>Enabling environment<br><br>Capacity building | Success factors<br><br>Obstacles   |

1  
2  
3 186 **SDGs and expanded view on child health enable change**  
4

5 187 Overall, interviewees reflected on the willingness by the national government to adopt the SDGs, how  
6 188 the possibility to achieving the SDGs depends on the outlook for the country while concluding that  
7 189 child health is a multisectoral topic at heart and that with the introduction of the SDGs the participants  
8 190 had set higher ambitions for child health and well-being.

9  
10  
11 191 Possibility for action due to SDGs

12  
13 192 The 2030 Agenda and the SDGs were thought of as a universally relevant vision for sustainable  
14 193 development, providing a concrete roadmap or guide for each country. Comparing with the previous  
15 194 Millennium Development Goals, participants reflected on how the SDGs represent a more complex  
16 195 and detailed set of objectives that mirror actual conditions in the country. There was an overall  
17 196 agreement that the SDGs showcase that health is a multisectoral issue more clearly than during the  
18 197 Millennium Development Goals era. However, although the commitment to and leadership of the  
19 198 national government of Cambodia in adopting and implementing the Cambodian Sustainable  
20 199 Development Goals were evident, some participants noted the discrepancy between the highly set  
21 200 ambitions of the contextualised SDGs with the resources and work committed.

22  
23 201 *“That’s the difference in perspectives between policymakers and implementers. The implementers in*  
24 202 *the ministry will complain about having lots of challenges and risks which could lead to a lower result.*  
25 203 *So, the plan to achieve many things by 2030 has already been written down. However, the*  
26 204 *implementation need budget and solutions to the challenge.” - Nr 21, non-governmental organisation*

27  
28  
29 205 Higher ambitions for child health, a multisectoral area at heart

30  
31  
32 206 Focusing on child health, most regarded children as people under the age of 18 and emphasised that  
33 207 physical and mental health are of equal importance to children. Interviewees detailed a range of  
34 208 linkages between child health and other sectors, mostly focusing on education and schooling, nutrition  
35 209 and other general societal conditions such as physical safety, environment, economic development  
36 210 and social protection systems. Overall, there was a strong notion of indivisibility between child health  
37 211 and its determinants, making the case that child health by definition is a multisectoral issue with all  
38 212 sectors responsible for its improvement.

39  
40 213 *“Like I mentioned, child health consists of physical, mental and social health. So, we need all relevant*  
41 214 *institutions to improve physical, mental and social health. We can’t miss anyone to work on it.” - Nr 5,*  
42 215 *governmental organisation*

43  
44 216 Interviewees put an emphasis on the family as responsible for the child’s health, while other  
45 217 stakeholders (government, international organisations and private sector) play an important role in  
46 218 shaping the determinants of child health in Cambodia. They further urged a concrete focus on  
47 219 preventive measures, improving quality and reach of health services related to the child and the family  
48 220 to improve child health further. Lastly, interviewees made the case for a life course approach to child  
49 221 health and setting a higher ambition for children with a focus on child growth and stronger  
50 222 acknowledgment of the rights of the child.

51  
52 223 *“To understand about the needs of children, we need to understand the growth of them first. Children’s*  
53 224 *development consists of children before birth, children after birth to two years old, children in*

1  
2  
3 225 *kindergarten and primary school, and children in high school. The development of children on physical*  
4 226 *health, education and morality are ongoing process.” - Nr 5, governmental organisation*

5  
6 227

7  
8 228 **Gap between theory and real-world complexities**

9  
10 229 When discussing multisectoral collaborations for child health, it became clear that there is a step-by-  
11 230 step linear process of thinking around the collaboration and its activities while aspects influencing the  
12 231 collaboration shape and direct the process in non-linear fashions. Participants also critically assess the  
13 232 collaborations, identifying success factors and obstacles for these types of collaborations in Cambodia.

14  
15  
16 233 Planned linear process of collaboration

17  
18 234 The beginning of a multisectoral collaboration typically began with the identification and framing of a  
19 235 problem. This could be from a top-down approach, whereby government ministries identified a gap or  
20 236 need, or through policy or development plans while funding opportunities and the own organisational  
21 237 strategy or values could be other ways of identifying a problem. On the other hand, interviewees also  
22 238 described a bottom-up approach of problems being identified through routine data or findings from  
23 239 the grassroot level, complemented by listening and learning from community or sub-national  
24 240 stakeholders. The identified problem was often not primarily concerned with health but noted that  
25 241 child health might stand to benefit as an effect of a successful solution to the problem. The problem  
26 242 was typically framed in a detailed problem statement following involvement of many stakeholders in  
27 243 collective process, often using research in some way to narrow the problem.

28  
29 244 *“So, the needs can be identified through annual reports and through our observation in different*  
30 245 *sectors. Sometimes, we also do things following the donors’ research and findings.” – Nr 1,*  
31 246 *governmental organisation.*

32  
33  
34 247

35  
36  
37  
38 248 *“They (government officials) collected all data from institutions under Ministry of Health. Then, they*  
39 249 *identified the challenge and priority action plans for next year. Besides, each unit need to monitor their*  
40 250 *annual results and to identify the priority action plans. That’s how the Ministry of Health and different*  
41 251 *units identify the needs on child health, status, results and ways forward to reach SDGs.”- Nr 6,*  
42 252 *governmental organisation.*

43  
44  
45 253

46  
47 254 The stakeholders involved in the discussed collaborations varied substantially, however the  
48 255 government (at national or sub-national level) was seen as a natural leader of collaborations while  
49 256 non-governmental organisations often organised in networks. Interviewees expressed territory  
50 257 feelings, with relatively strict boundaries between stakeholders and a critical view of government by  
51 258 the non-governmental organisations and vice versa.

52  
53  
54 259 *“I am not blaming the government institutions, but there are some institutions which have too clear*  
55 260 *boundaries on their responsibilities and work. This leads to failure in our work. “ – Nr 29, international*  
56 261 *organisation.*

57  
58  
59 262 Planning of the collaboration were seen as a complex, detailed and resource demanding process. Often  
60 263 not formalised, a capacity assessment of the stakeholders in the collaboration, primarily focusing on

1  
2  
3 264 implementation capacity and not on specific knowledge or expertise in a particular sector or area were  
4 265 usually done at this stage, with the division of activities based on this assessment. If there was not  
5 266 enough implementation capacity to solve the problem identified, the collaboration could not begin.  
6 267 During the planning process interviewees noted that prioritization of activities was done depending on  
7 268 the funding requirements and to secure buy-in from certain stakeholders (particularly national  
8 269 government) seen as necessary for the success of the collaboration.

11 270 *“For example, they (government servants) may plan 20 activities, but receive inadequate budget. So,*  
12 271 *they prioritize the activities to be done. According to my observation, district level is the same. They*  
13 272 *engage politics into their work. They like infrastructure development more than social development*  
14 273 *because it is eye-catching and visible.” – Nr 9, governmental organisation.*

17 274 Coordination was done in various ways depending on the collaboration however there were usually a  
18 275 common information sharing mechanisms, focal points at each stakeholder or joint committees with  
19 276 continuous coordination often built on somewhat already existing structures. There was also a clear  
20 277 division of responsibilities, although participation in joint coordination could be difficult to achieve and  
21 278 often those who coordinate do not have decision making power. Clear leadership of the collaboration  
22 279 was seen as paramount, with coordination succeeding or faltering based on the competence and  
23 280 willingness of the leader. As such, coordination was both a formal and informal process. Indeed, power  
24 281 and hierarchies shaped the coordination efforts where power imbalances or competition for funds  
25 282 between stakeholders could threaten the whole collaboration.

29 283 *“Those people also need to have the authorization in decision-making in the meeting. In the past, there*  
30 284 *were people who attended the meeting, but did not do what were discussed. It was useless when people*  
31 285 *came to listen, but didn’t share to their management and colleagues.” – Nr 15, non-governmental*  
32 286 *organisation.*

35 287 Implementation of the collaboration tried to follow the planning and set coordination mechanisms.  
36 288 However, collaborations were able to change depending on a change in the context or influencing  
37 289 aspects such as the Covid-19 pandemic or funding changes. Interviewees emphasised the difference  
38 290 between the national and sub-national level in terms of the collaboration, with larger collaborations  
39 291 having an administrative or policy function at the national level while implementation occurred at the  
40 292 sub-national level. This structure often led to increased complexities, with a different set of  
41 293 stakeholders needing to be involved at the different levels and the sub-national system having its own  
42 294 set of priorities.

46 295 *“National level only work on policy. So, implementation goes to community level. I think that we should*  
47 296 *focus on provincial and communal level first to let them implement the work. We should also try to*  
48 297 *integrate the coordination with national level too by using forum to meet and discuss on the challenge.”*  
49 298 *- Nr 28, international organisation.*

52 299 Monitoring and evaluation were seen as integral to the collaboration, enabling learning and  
53 300 improvement of the collaboration itself and its activities and serving as the main accountability  
54 301 mechanism. The responsibility of conducting the monitoring and evaluation varied depending on the  
55 302 context and funding available, with external evaluation being seen as favourable if it could be funded.  
56 303 The national government and international organisations relied heavily on monitoring and evaluation  
57 304 for making decisions about the collaborations. However, it was seen as hard to move beyond pure  
58  
59  
60

1  
2  
3 305 outputs, with quantitative indicators believed to be most reliable, and to attribute successes or failures  
4 306 to different stakeholders in the collaboration.

6 307 Dissemination of the collaboration and its activities were primarily thought of as information  
7 spreading, trying to raise awareness of the identified problem and engage the public and relevant  
8 308 stakeholders at national and international level in the efforts to solve it. It was also deemed important  
9 309 as a means of ensuring recognition from national level government ministries or the international  
10 310 community for the work done.  
11 311

13 312 *“We shared a lot, especially early childhood development program. We shared at provincial level and  
14 313 national committee on children education. We invited those committees to see our target location and  
15 314 our work. So, we disseminated a lot.”* Nr 22, non-governmental organisation.

17 315 Real-world complexities shaping the collaboration

19 316 There were a range of aspects influencing the process, often challenging the idea of a step-by-step  
20 317 linear approach of the collaboration. The most prominent aspect throughout was the funding,  
21 318 interviewees described the budget as the greatest limitation to the collaboration and called for more  
22 319 governmental funding at the national and sub-national level for multisectoral collaborations. Funding  
23 320 was seen as the most important source of power in the collaboration. Leadership roles, agenda setting  
24 321 and decision-making were mostly done by the organisation that controlled the funding.

26 322 *“More importantly, we need the money to be available at sub-national level. The partners are all  
27 323 institutions. If the government can’t manage to work on everything, we can ask civil society to help  
28 324 working on that. Nowadays, we are sceptical with NGOs. But, we also have example of government  
29 325 providing budget for NGOs to work.”* Nr 4, governmental organisation.

31 326 Relationships between the collaborators could facilitate or hamper the collaboration, with tensions  
32 327 between non-governmental organisations and the government existing and at the same time conflicts  
33 328 between government ministries or civil society networks that added complexity. For this reason, many  
34 329 collaborations tried to actively build relationships over time particularly between coordination focal  
35 330 points or joint committees, seeing mutual understanding leading to trust and confidence in the  
36 331 collaboration.

38 332 *“The collaborative work also became better. During my time at education sectors, the relationship  
39 333 between partners was going very well, and we were happy to share any documents or data.”* – Nr 23,  
40 334 non-governmental organisation.

42 335 *“There are many NGOs working to promote children. The government don’t even know who they are.  
43 336 Some NGOs don’t care about networking with the government too. This is the challenge according to  
44 337 my observation as a person in the middle of the two institutions. Both have their own weakness. Some  
45 338 NGOs do not know what the ministry have. For example, some NGOs do not know about existing  
46 339 guideline, plan or projects to work consistently. They only focus on their own work, and not pay  
47 340 attention to what others do to work collaboratively on the topic.”* – Nr 2, governmental organisation.

49 341 Capacity building were deemed to be key for the sustainability of the collaboration and its activities,  
50 342 particularly at the sub-national or implementation level, although demanding significant resources and  
51 343 the actual method varied depending on the type of collaborations and the stakeholders involved.

1  
2  
3 344 *“Whenever there are requests from anyone or any organisations, we always respond and provide the*  
4 345 *training or sharing of experiences. We never hide our knowledge. We don’t even charge them. We do*  
5 346 *it from our heart and soul.” – Nr 10, governmental organisation.*

7  
8 347 An enabling environment, particularly concerning policy and national governmental direction within  
9 348 which the collaboration took place, were seen as being of crucial importance. The introduction and  
10 349 adoption of the 2030 Agenda and the Cambodia Sustainable Development Goals, sub-national plans  
11 350 for development and national level plans promoted the idea of multisectoral collaboration.  
12 351 Government ministries that actively promoted or worked in multisectoral ways or through  
13 352 multisectoral committees, albeit not always successful, further promoted the advantages of tackling  
14 353 problems in a multisectoral fashion.

17 354 *“The main thing is whether or not they have the commitment to work together. When commitment on*  
18 355 *that occur, the work can be done easily because visions created in country and global level has already*  
19 356 *been created.” – Nr 17, non-governmental organisation.*

21  
22 357 Critically assessing collaborations

23  
24 358 Interviewees reflected critically on their collaborations and had through experience identified some  
25 359 key success factors and often faced obstacles of multisectoral collaborations in Cambodia. Having clear  
26 360 responsibilities with agreement on division of activities, leadership from all and functioning monitoring  
27 361 and evaluation as well as a common vision and understanding based on continuous learning in an open  
28 362 environment where benefits and goals were explicit seem to be key success factors. Further, many  
29 363 emphasised the necessity of securing buy in, trust and commitment from all stakeholders in the  
30 364 collaboration from the beginning with the national government having a special role in all  
31 365 collaborations.

34 366 *“Problems always occur. To work well with each other, we need to have collaborative plan with*  
35 367 *everyone’s ownership. Secondly, we need to build trust and not allow any mistrust to happen.” – Nr 27,*  
36 368 *international organisation.*

39 369 *“We also work closely and indirectly with selected institutions which have the most power.” – Nr 3,*  
40 370 *governmental organisation.*

42  
43 371

44 372 Obstacles identified were lack of funding or long-term sustainability of the collaboration and its  
45 373 activities, with politics on sub-national and national level could mean unfavourable conditions for a  
46 374 collaboration or simply competing priorities or work of the stakeholders in the collaboration. There  
47 375 could also be a sense of a lack of accountability towards each other or the thought beneficiaries, with  
48 376 sometime faltering commitment to work together, lack of transparency of funds or efforts, and  
49 377 difficulty of attributing failures or successes.

52  
53 378 *“For instance if we are looking among 25 sub national civil society working group at the*  
54 379 *provincial/municipal level, there was only 50% who were active. Among these half, only 20 to 30 % who*  
55 380 *were very active in fulfilment of their collaborative work.” – Nr 20, non-governmental organisation.*

57 381

58  
59 382 **DISCUSSION**

1  
2  
3 383 In this study, we found that the adoption of the SDGs led to an increased perceived possibility for  
4 384 action and higher ambitions for child health, perpetuating child health as a multisectoral issue. Further,  
5 385 there seem to be a gap between the desired step-by-step theory of conducting multisectoral  
6 386 collaboration and the real-world complexities of conducting such collaborations for child health in  
7 387 Cambodia. This is the first study to provide in-country insights that can be transferable on multisectoral  
8 388 collaborations for child health, overcoming some of the key methodological gaps noted by Glandon et  
9 389 al.[31] including describing power dynamics, type of governance arrangements and a diversity of  
10 390 stakeholder experiences.

11 391  
12  
13  
14  
15  
16 392 The expanded view of child health and higher ambition for children to thrive led to a more compelling  
17 393 case for multisectoral collaborations to have a collaborative advantage over single-sector or single-  
18 394 stakeholder efforts. The 2030 Agenda and the SDGs influence social norms at a global, country,  
19 395 organisational and individual level.[32] The widespread knowledge of the overarching ambition and  
20 396 content of the SDGs in our study serve to exemplify the notion of universality of the 2030 Agenda, and  
21 397 the normative significance of universality in a country context.[33] Further, the perceived high  
22 398 ambition of the SDGs, the diversity of topics covered in the SDGs and their interlinked nature might  
23 399 shift norms to be more favourable towards multisectoral collaboration, in line with Huxam's theory of  
24 400 collaboration advantage.[34] Placing children firmly in the centre of the SDGs in Cambodia might also  
25 401 allow for a re-vitalization of action and enable policy makers and practitioners to utilise the  
26 402 interlinkages within the SDGs to build multisectoral collaboration for child health.[35,36]

27  
28  
29  
30  
31 403  
32  
33 404 Multisectoral collaborations depicted by the participants in this study showcase that there is often no  
34 405 linear process but rather ongoing non-linear flow of activities that intentionally lead to a multisectoral  
35 406 collaboration (see **Supplementary Material 1** for illustrative examples of multisectoral collaborations).  
36 407 The rational logic of inquiry theory whereby one step lead to the next one until a decision is made and  
37 408 action is implemented and evaluated originally proposed by Dewey[37] were perceived by the  
38 409 participants to be the desired theory or process of collaboration. However as showcased by Kuruvilla  
39 410 and Dorstoewitz[38] previously, the collaborations described somewhat mimic the multisectoral  
40 411 collaboration model[20] which rests on dynamic networks and changing contexts. There was usually a  
41 412 capacity assessment of the potential or included stakeholders at the beginning of the collaboration,  
42 413 however it was usually described as informal or focused on securing funding and political buy-in rather  
43 414 than ensuring the implementation capacity of the collaboration, which could be why many  
44 415 collaborations had to divert from the desired linear process. Indeed, in our study participants singled  
45 416 out funding as an enabler and obstacle as well as a significant source of power in multisectoral  
46 417 collaborations. As noted by Rasanathan et al.[39] if multisectoral collaborations for health are to  
47 418 succeed appropriate financing systems that incentivise these collaborations must be in place, and the  
48 419 multisectoral monitoring and evaluation mechanisms allow for accountability. Conflicting perspectives  
49 420 between stakeholders, particularly government and non-governmental stakeholders, has been  
50 421 documented in Cambodia[25,26,40,41] and in other settings [42,43]. In our study there was a  
51 422 difference between interviewees from governmental organisations versus those from non-  
52 423 governmental particularly concerning the commitment and ability of the government to support and  
53 424 participate in multisectoral collaborations for child health. Although exploring this potential conflict  
54 425 was not the aim of this study, the emphasis of the participants on explicit and implicit territory feelings,



1  
2  
3 426 hierarchies and power dynamics at a national and sub-national level in Cambodia strengthen the need  
4 427 to include these concepts in collaborative theory and when designing multisectoral  
5 428 collaborations.[44,45]  
6  
7  
8 429

9  
10 430 Our limitations include that the purposive sampling led to selection bias in the recruitment of  
11 431 participants. As illustrated in Table 1, the interviewees were slightly unbalanced in terms of gender  
12 432 and work experience in SDG areas. Further, although much of the implementation of multisectoral  
13 433 collaborations is at the sub-national level the focus of this study was on the national level. Future  
14 434 studies might benefit from including participants with knowledge of collaborations on the sub-national  
15 435 level. Participants were asked to reflect on one or two multisectoral collaborations to inform the  
16 436 answers to the questions in the interview, they might have had a positive recall bias, only including  
17 437 those that were successful. Given the critical assessment of the multisectoral collaborations apparent  
18 438 in the interviews this seem negligible, however. Lastly, intra-personal dynamics between the  
19 439 interviewer and the interviewee might affect the answers and follow-up questions. In our study, the  
20 440 interviews were conducted by SS and TC, both representing academic institutions and being  
21 441 knowledgeable of qualitative research methods and the political landscape of organisations in  
22 442 Cambodia, ideally enabling both government and non-government stakeholders to express views and  
23 443 perceptions freely while adding credibility to the results. Although some of the findings in this study  
24 444 might reflect the unique Cambodia context, we believe that overall themes and conclusions are  
25 445 transferable to other middle-income countries and similar settings, adding valuable evidence on how  
26 446 stakeholders view multisectoral collaborations in general and specifically for child health. The study  
27 447 was designed to accomplish high information power across the five dimensions of information  
28 448 power,[22] however, with a broad research question and cross-case analysis the sample size was  
29 449 deemed to have to be relatively large to reach satisfactory information power and theoretical  
30 450 saturation. Information power was further increased by use of dense sampling method (purposive and  
31 451 specific), applied theory in the form of established frameworks for multisectoral collaborations, and  
32 452 high-quality dialogue in the interviews allowing for in-depth diverse multistakeholder perspectives.  
33  
34  
35  
36  
37  
38  
39  
40 453

## 41 454 **CONCLUSION**

42  
43  
44 455 We found that stakeholders in Cambodia perceived the SDGs to inspire an expanded view on child  
45 456 health that enabled change and promoted multisectoral collaboration. Interviewees experienced a gap  
46 457 between the desired theory of conducting multisectoral collaborations for child health and the real-  
47 458 world complexities of engaging in such an endeavour. The findings from this in-depth study can inform  
48 459 policy makers and practitioners who wish to encourage and take advantage of multisectoral  
49 460 collaborations for accelerating the work towards achieving better health in general and child health  
50 461 specifically the era of the SDGs.  
51  
52  
53 462

## 54 463 **Contributors**

55  
56  
57 464 TA, HMA and DH conceived and designed the study. TC and SS contributed to the study design and  
58 465 conducted the data collection. DH analysed the data together with TC, SS and HMA. DH wrote the first  
59  
60

1  
2  
3 466 draft of the manuscript to which all authors (DH, TC, SS, HN SK, HMA and TA) provided critical  
4 467 contributions. All authors read and approved the final manuscript.

5  
6 468 **Funding**

7  
8 469 The work was supported by the Swedish Research Council (2018-03609). The funding organisation  
9 470 were not involved in the manuscript's writing or the decision to submit it for publication.

10  
11 471 **Competing interests**

12  
13 472 None declared.

14  
15 473 **Patient consent for publication**

16  
17 474 Not applicable.

18  
19 475 **Ethics approval**

20  
21 476 The study received ethical approval from the National Ethics Committee for Health Research in  
22 477 Cambodia (NECHR-023) and was exempt from ethical review from the Swedish Ethical Review  
23 478 Authority (Dnr 2022-00424-01). Written informed consent was obtained from all participants before  
24 479 inclusion in the study.

25  
26  
27 480 **Data availability statement**

28  
29 481 No data is available. This is a qualitative study of a relatively small sample population in Cambodia.  
30 482 Making the dataset publicly available could potentially breach the privacy that was promised to  
31 483 participants when they agreed to take part and the ethical approvals granted. Therefore, the authors  
32 484 will not make the full transcripts available to a wider audience.

33  
34 485

35  
36 486

37  
38  
39 487 **References**

- 40  
41 488 1 Independent Accountability Panel. Caught in the COVID-19 storm: women's, children's, and  
42 489 adolescents' health in the context of UHC and the SDGs. Geneva: 2020.  
43 490 [https://iapewec.org/wp-content/uploads/2020/12/IAP-2020-Report\\_web-sp.pdf](https://iapewec.org/wp-content/uploads/2020/12/IAP-2020-Report_web-sp.pdf)  
44  
45 491 2 United Nations. The Sustainable Development Goals Report. New York: 2022.  
46 492 [https://unstats.un.org/sdgs/report/2022/The-Sustainable-Development-Goals-Report-](https://unstats.un.org/sdgs/report/2022/The-Sustainable-Development-Goals-Report-2022.pdf)  
47 493 [2022.pdf](https://unstats.un.org/sdgs/report/2022/The-Sustainable-Development-Goals-Report-2022.pdf)  
48  
49 494 3 Marmot M. Achieving health equity: from root causes to fair outcomes. *Lancet*  
50 495 2007;**370**:1153–63. doi:10.1016/S0140  
51  
52 496 4 Bishai DM, Cohen R, Alfonso YN, *et al.* Factors Contributing to Maternal and Child Mortality  
53 497 Reductions in 146 Low-and Middle- Income Countries between 1990 and 2010. *PLoS One*  
54 498 2016;**11**:e0144908. doi:10.1371/journal.pone.0144908  
55  
56 499 5 Every Woman Every Child. The global strategy for women's children's and adolescents' health  
57 500 (2016-2030). New York: 2015.  
58  
59 501 6 Alfvén T, Dahlstrand J, Humphreys D, *et al.* Placing children at the center of the Sustainable  
60 502 Development Report: A SIGHT – Swedish Society of Medicine Road Map on Global Child

- 1  
2  
3 503 Health. Stockholm: 2019.
- 4  
5 504 7 Lawn JE, Rohde J, Rifkin S, *et al.* Alma-Ata 30 years on: revolutionary, relevant, and time to  
6 505 revitalise. *Lancet (British Ed)* 2008;**372**:917–27. doi:http://dx.doi.org/10.1016/S0140-  
7 506 6736(08)61402-6
- 8  
9 507 8 Organization WH. Time to deliver: report of the WHO Independent High-Level Commission on  
10 508 Noncommunicable Diseases. Geneva: 2018.
- 11  
12 509 9 Rasanathan K, Damji N, Atsbeha T, *et al.* Ensuring multisectoral action on the determinants of  
13 510 reproductive, maternal, newborn, child, and adolescent health in the post-2015 era. *BMJ*  
14 511 2015;**351**:h4213. doi:10.1136/bmj.h4213
- 15  
16 512 10 Levinson FJ, Balarajan Y, Marini A. Addressing malnutrition multisectorally. What have we  
17 513 learned from recent international experience? New York: 2013.
- 18  
19 514 11 Lo S, Das P, Horton R. A good start in life will ensure a sustainable future for all. *Lancet*  
20 515 2017;**389**:8–9. doi:10.1016/S0140-6736(16)31774-3
- 21  
22 516 12 Neuman MJ, Devercelli AE. What matters most for early childhood development? A  
23 517 framework paper. Systems Approach for Better Education Results (SABER) working paper  
24 518 series. Washington: 2013.
- 25  
26 519 13 Blomstedt Y, Bhutta ZA, Dahlstrand J, *et al.* Partnerships for child health: capitalising on links  
27 520 between the sustainable development goals. *BMJ* 2018;**360**:k125. doi:10.1136/BMJ.K125
- 28  
29 521 14 Kuruvilla S, Schweitzer J, Bishai D, *et al.* Policy and Practice: Success factors for reducing  
30 522 maternal and child mortality. *Bull World Health Organ* 2014;**92**:533–44.  
31 523 doi:10.2471/BLT.14.138131
- 32  
33 524 15 Ahmed SM, Rawal LB, Chowdhury SA, *et al.* Cross-country analysis of strategies for achieving  
34 525 progress towards global goals for women's and children's health. *Bull World Health Organ*  
35 526 2016;**94**:351–61. doi:10.2471/BLT.15.168450
- 36  
37 527 16 UNICEF. Child Poverty in Cambodia Summary Report. Phnom Penh: 2018.
- 38  
39 528 17 Kaba MW, Baesel K, Poch B, *et al.* IDPoor: a poverty identification programme that enables  
40 529 collaboration across sectors for maternal and child health in Cambodia. *BMJ* 2018;**363**:k4698.  
41 530 doi:10.1136/bmj.k4698
- 42  
43 531 18 UNICEF. Reducing Stunting in Children Under Five Years of Age: A Comprehensive Evaluation  
44 532 of UNICEF's Strategies and Programme Performance – Cambodia Country Case Study. New  
45 533 York: 2017.
- 46  
47 534 19 Royal Government of Cambodia. Cambodian Sustainable Development Goals (CSDGs)  
48 535 Framework (2016-2030). Phnom Penh: 2018.
- 49  
50 536 20 Kuruvilla S, Hinton R, Boerma T, *et al.* Business not as usual: how multisectoral collaboration  
51 537 can promote transformative change for health and sustainable development. *BMJ*  
52 538 2018;**363**:k4771. doi:10.1136/bmj.k4771
- 53  
54 539 21 Tong A, Sainsbury P, Craig J. Consolidated criteria for reporting qualitative research: A 32-item  
55 540 checklist for interviews and focus groups. *Int J Qual Heal Care* 2018;**19**:349–57.
- 56  
57 541 22 Malterud K, Siersma VD, Guassora AD. Sample Size in Qualitative Interview Studies: Guided by  
58 542 Information Power. *Qual Health Res* 2016;**26**:1753–60. doi:10.1177/1049732315617444
- 59  
60 543 23 Bertelsmann Stiftung. BTI 2022 Country Report — Cambodia. 2022.

- 1  
2  
3 544 24 Royal Government of Cambodia. National Program for Sub-National Democratic  
4 545 Development. Phnom Penh: 2010.  
5  
6 546 25 Un K. *Cambodia: Return to Authoritarianism*. Cambridge University Press 2019.  
7  
8 547 26 Frewer T. Doing NGO Work: the politics of being 'civil society' and promoting 'good  
9 548 governance' in Cambodia. *Aust Geogr* 2013;**44**:97-114,. doi:10.1080/00049182.2013.765350  
10  
11 549 27 International Council for Science. A guide to SDG interactions: from science to  
12 550 implementation. Paris: 2017.  
13  
14 551 28 World Health Organization. Health in all policies: Helsinki statement. Framework for country  
15 552 action. Geneva: 2014.  
16  
17 553 29 Gale N, Heath G, Cameron E, *et al*. Using the framework method for the analysis of qualitative  
18 554 data in multi-disciplinary health research. *BMC Med Res Methodol* 2013, 2013;**13**:260–1.  
19  
20 555 30 Malterud K. Theory and interpretation in qualitative studies from general practice: Why and  
21 556 how? *Scand J Public Health* 2016;**44**:120–9. doi:10.1177/1403494815621181  
22  
23 557 31 Glandon D, Mondal S, Okeyo I, *et al*. Methodological gaps and opportunities for studying  
24 558 multisectoral collaboration for health in low- and middle-income countries. *Health Policy Plan*  
25 559 2019;**34**:ii7–17. doi:10.1093/heapol/czz116  
26  
27 560 32 Schmiege G, Meyer E, Schrickel I, *et al*. Modeling normativity in sustainability: a comparison of  
28 561 the sustainable development goals, the Paris agreement, and the papal encyclical. *Sustain Sci*  
29 562 2018;**13**:785–96. doi:10.1007/s11625-017-0504-7  
30  
31 563 33 Long G. The idea of universality in the sustainable development goals. *Ethics Int Aff*  
32 564 2015;**29**:203–22. doi:10.1017/S0892679415000076  
33  
34 565 34 Huxham C. Theorizing collaboration practice. *Public Manag Rev* 2003;**5**:401–23.  
35 566 doi:10.1080/1471903032000146964  
36  
37 567 35 Alfvén T, Dahlstrand J, Humphreys D, *et al*. Placing children and adolescents at the centre of  
38 568 the Sustainable Development Goals will deliver for current and future generations. *Glob*  
39 569 *Health Action* 2019;**12**:1670015. doi:10.1080/16549716.2019.1670015  
40  
41 570 36 Clark H, Coll-seck AM, Banerjee A, *et al*. The Lancet Commissions A future for the world ' s  
42 571 children ? A WHO – UNICEF – Lancet Commission. *Lancet* 2020;**395**:605–58.  
43 572 doi:10.1016/S0140-6736(19)32540-1  
44  
45 573 37 Dewey J. *Logic: The Theory of Inquiry*. New York: : Holt, Rinehart and Winston 1938.  
46  
47 574 38 Kuruvilla S, Dorstewitz P. There is no 'point' in decision-making: A model of transactive  
48 575 rationality for public policy and administration. *Policy Sci* 2010;**43**:263–87.  
49 576 doi:10.1007/s11077-009-9098-y  
50  
51 577 39 Rasanathan K, Atkins V, Mwansambo C, *et al*. Governing multisectoral action for health in low-  
52 578 income and middleincome countries: An agenda for the way forward. *BMJ Glob Heal*  
53 579 2018;**3**:1–6. doi:10.1136/bmjgh-2018-000890  
54  
55 580 40 Schröder P, Young S. The Implications of Closing Civic Space for Sustainable Development in  
56 581 Cambodia. Sussex: 2019.  
57  
58 582 41 Norén-Nilsson A, Bourdier F. Introduction: Social Movements in Cambodia. *J Curr Southeast*  
59 583 *Asian Aff* 2019;**38**:3–9. doi:10.1177/1868103419848192  
60  
61 584 42 Rajabi M, Ebrahimi P, Aryankhesal A. Collaboration between the government and

- 1  
2  
3 585 nongovernmental organizations in providing health-care services: A systematic review of  
4 586 challenges. *J Educ Health Promot* 2021;**10**:1–9. doi:10.4103/jehp.jehp  
5  
6 587 43 Ejaz I, Shaikh B, Rizvi N. NGOs and government partnership for health systems  
7 588 strengthening:A qualitative study presenting viewpoints of government, NGOs and donors in  
8 589 Pakistan. *BMC Health Serv Res* 2011;**11**:122. doi:https://doi.org/10.1186/1472-6963-11-122  
9  
10 590 44 Faul M V. Multi-sectoral partnerships and power. Geneva: 2015.  
11  
12 591 45 Purdy JM. Power in Collaborative Governance. *Public Adm Rev* 2012;**72**:409–17.  
13 592 doi:10.1111/j.1540-6210.2012.02525.x.A  
14  
15 593  
16 594  
17  
18 595  
19  
20 596  
21  
22 597  
23  
24 598  
25  
26  
27  
28  
29  
30  
31  
32  
33  
34  
35  
36  
37  
38  
39  
40  
41  
42  
43  
44  
45  
46  
47  
48  
49  
50  
51  
52  
53  
54  
55  
56  
57  
58  
59  
60

For peer review only

# Supplementary Material 1

## Table of Contents

**Interview Guide ..... 2**

**Consolidated criteria for reporting qualitative studies (COREQ): 32-item checklist ..... 6**

**Full coding tables ..... 9**

**Examples of multisectoral collaboration that include child health and well-being in Cambodia..... 21**

For peer review only

# Interview Guide

**1. Background information.** Please mark and fill in the following questions on this sheet

1  
2  
3  
4  
5  
6  
7  
8  
9  
10  
11  
12  
13  
14  
15  
16  
17  
18  
19  
20  
21  
22  
23  
24  
25  
26  
27  
28  
29  
30  
31  
32  
33  
34  
35  
36  
37  
38  
39  
40  
41  
42  
43  
44  
45  
46  
47  
48  
49  
50  
51  
52  
53  
54  
55  
56  
57  
58  
59  
60

**1. How many years have you worked:** \_\_\_\_\_

**2. Sex**  Female  Male

**3. Education**

Highest degree: \_\_\_\_\_

Topic of degree: \_\_\_\_\_

**4. Work experience**

**Current employment**

**Organization:** \_\_\_\_\_ **Role/Position:** \_\_\_\_\_

**Work experience from the following sectors (represented by Cambodia Sustainable Development Goals) - Multiple Answers**

| Sectors                           | Rural                    | Urban                    | Sectors                                                     | Rural                    | Urban                    |
|-----------------------------------|--------------------------|--------------------------|-------------------------------------------------------------|--------------------------|--------------------------|
| 1. Poverty/social protection      | <input type="checkbox"/> | <input type="checkbox"/> | 10. Income inequality                                       | <input type="checkbox"/> | <input type="checkbox"/> |
| 2. Food and nutrition             | <input type="checkbox"/> | <input type="checkbox"/> | 11. Sustainable cities/communities/urban planning           | <input type="checkbox"/> | <input type="checkbox"/> |
| 3. Health and well-being          | <input type="checkbox"/> | <input type="checkbox"/> | 12. Safe consumption and production                         | <input type="checkbox"/> | <input type="checkbox"/> |
| 4. Education                      | <input type="checkbox"/> | <input type="checkbox"/> | 13. Climate change                                          | <input type="checkbox"/> | <input type="checkbox"/> |
| 5. Gender equality                | <input type="checkbox"/> | <input type="checkbox"/> | 14. Life bellow water/ocean                                 | <input type="checkbox"/> | <input type="checkbox"/> |
| 6. Water and sanitation           | <input type="checkbox"/> | <input type="checkbox"/> | 15. Life on land/natural resources                          | <input type="checkbox"/> | <input type="checkbox"/> |
| 7. Energy                         | <input type="checkbox"/> | <input type="checkbox"/> | 16. Institutional strengthening/anti corruption/legislation | <input type="checkbox"/> | <input type="checkbox"/> |
| 8. Labor market, financial sector | <input type="checkbox"/> | <input type="checkbox"/> | 17. Partnerships/collaborative networks                     | <input type="checkbox"/> | <input type="checkbox"/> |

|                                                                                                                                                                                                  |                          |                          |                            |                          |                          |
|--------------------------------------------------------------------------------------------------------------------------------------------------------------------------------------------------|--------------------------|--------------------------|----------------------------|--------------------------|--------------------------|
| 9. Industry and infrastructure                                                                                                                                                                   | <input type="checkbox"/> | <input type="checkbox"/> | 18. Cambodia Mine/ERW free | <input type="checkbox"/> | <input type="checkbox"/> |
| Other:                                                                                                                                                                                           |                          |                          | <input type="checkbox"/>   | <input type="checkbox"/> |                          |
| <p>Have you worked related to child health (both health and non-health sector)? <input type="checkbox"/> Yes <input type="checkbox"/> No</p> <p>If yes, please describe shortly in what way:</p> |                          |                          |                            |                          |                          |

*Thank you for providing telling us your background, we would now like to know a little bit more about your views on the topics of Sustainable Development, child health and multisectoral work in general.*

## **2. Background: Sustainable Development Goals, child health and multisectoral work**

*The 2030 Agenda and the 17 Sustainable Development Goals is a framework with a comprehensive set of goals adopted by the UN in 2015 for all countries to end poverty, protect the planet and ensure prosperity for all. These have been adapted to the Cambodia Sustainable Goals.*

2.1. What were your first thoughts/opinion when the 2030 Agenda and the Sustainable Development Goals were launched?

2.1.2. What have your organization done now in relation to the Sustainable Development Goals in Cambodia compared to what you did with the Millennium Development Goals before and? (*mode of work rather than specific activities*)

2.2. Could you please describe what you would say child health includes?

2.2.1 What age? What to you include in the term “health” when it comes to children?

2.2.2 Are there any particular aspects of the health of children that you think the health system need to take special consideration to?

2.3. How do you think actors in Cambodia contribute in supporting child health to implement the Cambodia Sustainable Development Goals?

2.4. What are the linkages/connections between child health and non-health sectors (as represented by the Cambodia Sustainable Development Goals)?

2.4.1 Please provide examples of such linkages from your current/former work or what you have observe in the society?

2.4.2 Many sectors and activities can influence child health. Which sectors do you think are most relevant for child health?



1  
2  
3 *Thank you for providing your views on these topics, now we would like to ask you some further*  
4 *questions on the multisectoral work around child health that you have experience from. Please*  
5 *think of a collaboration specifically, or generally if you have experience from many different,*  
6 *between two or more sectors that had the explicit goal to in some way increase child health and*  
7 *well-being.*  
8  
9

### 10 11 **3. Multisectoral collaboration for child health**

12 Based on the Multisectoral collaborative model and the Health in all policies approach.

#### 13 **i) Drive change/Establishing the need for multisectoral work**

14  
15  
16  
17 3.1. Which organizations are your key stakeholders to work in promoting child health?

18  
19 3.1. What was it that made the partners in the collaboration identify the need for  
20 multisectoral work? How did it begin?  
21

#### 22 23 **ii) Defining the problem and constraints**

24  
25 3.2. How was the above-mentioned child health need identified, defined or framed?  
26  
27

#### 28 29 **iii) Design of the collaboration/Planned framed action & Supportive structures and policies**

30 3.3. Was there a planning process of how to conduct the multisectoral work?  
31

32 3.4. Which stakeholders were involved in planning?  
33

34 3.5. How was the work of collaboration designed to be carried out?  
35

36 3.5.1 How was the coordination organized?  
37

38 3.5.2 How was the collaboration implemented?  
39

40 3.5.3 How was the work of the collaboration financed or mobilized?  
41

42 3.5. How do you think the multisectoral work were actually implemented compared to  
43 the plan?  
44

45 3.6. Where there any supportive structures or policies in place that enabled the work to  
46 be conducted?  
47

#### 48 49 **iv) Capture success / Monitoring and evaluation**

50 3.7. How was the multisectoral work monitored and evaluated?  
51

52 3.7.1 Was there any key indicators or markers of success monitored?  
53

54 3.7.2 How was the success or failure attributed to between the partners in the  
55 collaboration?  
56

#### 57 58 59 **V) Relate / Facilitate assessment and engagement & Build capacity** 60

1  
2  
3 3.8. How did the relationship between the partners evolve during the multisectoral  
4 work?  
5

6 3.9. Did the collaborating partners make any effort to improve their relationship?  
7

8 3.10. Where there any efforts to engage with a wider group of actors or the public in the  
9 work?  
10

11 4. Where there any type of capacity building activities included in the collaboration?  
12  
13  
14

### 15 **Final questions**

16 **5.1.** What are your suggestions and recommendations in order to improve multisectoral  
17 collaboration to promote child health?  
18

19 **5.2.** Are there any end points you want to add on any of the topics touched upon today or that  
20 we have not spoken about?  
21  
22  
23  
24  
25  
26  
27  
28  
29  
30  
31  
32  
33  
34  
35  
36  
37  
38  
39  
40  
41  
42  
43  
44  
45  
46  
47  
48  
49  
50  
51  
52  
53  
54  
55  
56  
57  
58  
59  
60

## Consolidated criteria for reporting qualitative studies (COREQ): 32-item checklist

| No.                                            | Item                                     | Description                                                                                                                                                                                                                                                                          | Page |
|------------------------------------------------|------------------------------------------|--------------------------------------------------------------------------------------------------------------------------------------------------------------------------------------------------------------------------------------------------------------------------------------|------|
| <b>Domain 1: Research team and reflexivity</b> |                                          |                                                                                                                                                                                                                                                                                      |      |
| <b>Personal characteristics</b>                |                                          |                                                                                                                                                                                                                                                                                      |      |
| 1                                              | Interviewer/facilitator                  | SS and TC conducted the interviews                                                                                                                                                                                                                                                   | 4    |
| 2                                              | Credentials                              | DH has a MD, SS has PhD, TC has MD and has a Master of Arts in Health Social Sciences, HN has a PhD, KR has a PhD, HMA has a PhD and TA has a PhD.                                                                                                                                   | 1    |
| 3                                              | Occupation                               | DH was a PhD candidate, SS was a lecturer at the Royal University of Phnom Penh, TC was a program manager at Malaria Consortium Cambodia.                                                                                                                                            | 1    |
| 4                                              | Gender                                   | All interviewers were male.                                                                                                                                                                                                                                                          | NA   |
| 5                                              | Experience and training                  | The researchers (SS and TC) had extensive experience of qualitative interviews from previous research in Cambodia.                                                                                                                                                                   | 16   |
| <b>Relationship with participants</b>          |                                          |                                                                                                                                                                                                                                                                                      |      |
| 6                                              | Relationship established                 | No relationship was established prior to study commencement.                                                                                                                                                                                                                         | 16   |
| 7                                              | Participant knowledge of the interviewer | In some instances, the participant recognized the interviewer from attending similar events/workshops/seminars but in general the participants did not know the interviewers. They did not know the personal goals or reasons for doing the research for the individual interviewer. | 16   |
| 8                                              | Interviewer characteristics              | The interviewers were all interested in the topic in general and had expertise in child health in Cambodia.                                                                                                                                                                          | 4    |
| <b>Domain 2: Study design</b>                  |                                          |                                                                                                                                                                                                                                                                                      |      |
| <b>Theoretical framework</b>                   |                                          |                                                                                                                                                                                                                                                                                      |      |

|                       |                                       |                                                                                                                                                                                                                                                                                                               |     |
|-----------------------|---------------------------------------|---------------------------------------------------------------------------------------------------------------------------------------------------------------------------------------------------------------------------------------------------------------------------------------------------------------|-----|
| 9                     | Methodological orientation and theory | The methodological orientation of the study is content analysis, specifically framework analysis.                                                                                                                                                                                                             | 4   |
| Participant selection |                                       |                                                                                                                                                                                                                                                                                                               |     |
| 10                    | Sampling                              | Participants were purposively selected based on predefined criteria of having expertise in child health or being from a non-health sector (for example water and sanitation, agriculture, infrastructure etc.) but with implementation knowledge of how that sector interacts with other sectors in Cambodia. | 4   |
| 11                    | Method of approach                    | Participants were approached via email and telephone.                                                                                                                                                                                                                                                         | NA  |
| 12                    | Sample size                           | 29 participated in the interviews.                                                                                                                                                                                                                                                                            | 4   |
| 13                    | Non-participation                     | No participants refused or dropped out.                                                                                                                                                                                                                                                                       | 4   |
| Setting               |                                       |                                                                                                                                                                                                                                                                                                               |     |
| 14                    | Setting of data collection            | The interviews took place either virtually (over online meeting) or face to face, at a time and place convenient of the participant.                                                                                                                                                                          | 4   |
| 15                    | Presence of non-participants          | The were no non-participants present during the interviews.                                                                                                                                                                                                                                                   | 4   |
| 16                    | Description of sample                 | The description of the sample can be seen in Table 1 in the article.                                                                                                                                                                                                                                          | 5   |
| Data collection       |                                       |                                                                                                                                                                                                                                                                                                               |     |
| 17                    | Interview guide                       | This is provided in the supplementary material 1. The interview guide was piloted before the study began.                                                                                                                                                                                                     | 4-5 |
| 18                    | Repeat interviews                     | No repeat interviews were held.                                                                                                                                                                                                                                                                               | NA  |
| 19                    | Audio/visual recording                | Audio recording was used to collect the data.                                                                                                                                                                                                                                                                 | 4   |
| 20                    | Field notes                           | No field notes were taken.                                                                                                                                                                                                                                                                                    | 4   |
| 21                    | Duration                              | The duration of the interviews ranged from 45 minutes to 1 hr and 15 minutes                                                                                                                                                                                                                                  | NA  |
| 22                    | Data saturation                       | Is discussed with regards to information power in the article.                                                                                                                                                                                                                                                | 16  |

|                                 |                                |                                                                                 |       |
|---------------------------------|--------------------------------|---------------------------------------------------------------------------------|-------|
| 23                              | Transcripts returned           | Transcripts were not returned to participants.                                  | NA    |
| Domain 3: Analysis and findings |                                |                                                                                 |       |
| Data analysis                   |                                |                                                                                 |       |
| 24                              | Number of data coders          | DH coded the data                                                               | 8     |
| 25                              | Description of the coding tree | Is presented in Table 2 in the manuscript and supplementary material 1.         | 9     |
| 26                              | Derivation of themes           | The themes were derived from the data.                                          | 8     |
| 27                              | Software                       | Nvivo software were used for the coding.                                        | 8     |
| 28                              | Participant checking           | The participants did not provide feedback on the findings.                      | NA    |
| Reporting                       |                                |                                                                                 |       |
| 29                              | Quotations presented           | Quotations presented with each paragraph, trying to illustrate the main points. | 10-14 |
| 30                              | Data and findings consistent   | The data and findings were cross-checked multiple times, ensuring consistency.  | 16    |
| 31                              | Clarity of major themes        | Outlined in result table and in clear headings in the result section.           | 9-14  |
| 32                              | Clarity of minor themes        | Outlined in result table and in clear headings in the result section.           | 9-14  |

Full coding tables

Main themes and findings - full coding tables

|                      |                                                       |                                           |                                                          |                                                         |
|----------------------|-------------------------------------------------------|-------------------------------------------|----------------------------------------------------------|---------------------------------------------------------|
| <b>Theme</b>         | SDGs and expanded view on child health enable change  |                                           |                                                          |                                                         |
| <b>Sub-themes</b>    | Possibility for action due to SDGs                    |                                           |                                                          |                                                         |
| <b>Categories</b>    | Government commitment to and leadership of SDGs       | SDGs provide a common vision and guide    |                                                          | Discrepancy between ambition and actual work            |
| <b>Subcategories</b> |                                                       | More detailed than MDGs                   | Showcase that health is a multisectoral issue            |                                                         |
| <b>Codes</b>         | Adoption and change of national plans and policies    | Provide a clear set of goals              | Illustrate that health is a multisectoral issue          | SDGs too complex, impossible to succeed                 |
|                      | No change in government as leaders of the goals       | Provide a roadmap or guide                | SDGs reflecting actual conditions with regards to health | High ambition not matched with resources/work committed |
|                      | SDG implementation depends on alignment to government | More detailed                             |                                                          |                                                         |
|                      |                                                       | More complex reflecting actual conditions |                                                          |                                                         |

## Main themes and findings - full coding tables, continued.

|                       |                                                                    |                                                                                           |                                                                                                            |                                                                                                                               |                                                                                                                                         |                                                                                                                 |
|-----------------------|--------------------------------------------------------------------|-------------------------------------------------------------------------------------------|------------------------------------------------------------------------------------------------------------|-------------------------------------------------------------------------------------------------------------------------------|-----------------------------------------------------------------------------------------------------------------------------------------|-----------------------------------------------------------------------------------------------------------------|
| <b>Themes</b>         | SDGs and expanded view on child health enable change               |                                                                                           |                                                                                                            |                                                                                                                               |                                                                                                                                         |                                                                                                                 |
| <b>Sub-themes</b>     | Higher ambitions for child health, a multisectoral area at heart   |                                                                                           |                                                                                                            |                                                                                                                               |                                                                                                                                         |                                                                                                                 |
| <b>Categories</b>     | Definition of child health                                         |                                                                                           | Child health linkages across sectors                                                                       |                                                                                                                               |                                                                                                                                         |                                                                                                                 |
| <b>Sub-categories</b> | Child age under 18 years                                           | A focus on not only health but well-being                                                 | Child health by definition a multisectoral issue                                                           | Education and schooling                                                                                                       | Nutrition                                                                                                                               | General societal conditions                                                                                     |
| <b>Codes</b>          | General view and legally a child is a person under 18 years of age | Physical and mental health equally important<br><br>Good nutrition and absence of disease | All SDGs important for child health<br><br>The linkages between sectors and child health cannot be divided | Education as most formative experience<br><br>School important physical place for linkages<br><br>Early child development key | Nutrition and functioning agricultural sector as basis for child growth<br><br>Commercial interests conflicts with good child nutrition | Physical safety and hygiene environment<br><br>Economic development of country<br><br>Social protection systems |

1  
2  
3  
4  
5  
6  
7  
8  
9  
10  
11  
12  
13  
14  
15  
16  
17  
18  
19  
20  
21  
22  
23  
24  
25  
26  
27  
28  
29  
30  
31  
32  
33  
34  
35  
36  
37  
38  
39  
40  
41  
42  
43  
44  
45  
46

Main themes and findings - full coding tables, continued.

|                       |                                                                                                                                                                                |                                                                                                                                                                                 |                                                                                                                                             |                                                                                                     |                                                                                    |
|-----------------------|--------------------------------------------------------------------------------------------------------------------------------------------------------------------------------|---------------------------------------------------------------------------------------------------------------------------------------------------------------------------------|---------------------------------------------------------------------------------------------------------------------------------------------|-----------------------------------------------------------------------------------------------------|------------------------------------------------------------------------------------|
| <b>Theme</b>          | SDGs and expanded view on child health enable change                                                                                                                           |                                                                                                                                                                                 |                                                                                                                                             |                                                                                                     |                                                                                    |
| <b>Sub-themes</b>     | Higher ambitions for child health, a multisectoral area at heart                                                                                                               |                                                                                                                                                                                 |                                                                                                                                             |                                                                                                     |                                                                                    |
| <b>Categories</b>     | Aspects of the health system and actors unique to children                                                                                                                     |                                                                                                                                                                                 |                                                                                                                                             | Special considerations for children                                                                 |                                                                                    |
| <b>Sub-categories</b> | Responsibility of family and community                                                                                                                                         | Influence of other actors                                                                                                                                                       | Key aspects of health system for improving child health                                                                                     | Life course approach                                                                                | Enabling the child to thrive                                                       |
| <b>Codes</b>          | Parents and family are the primary caretaker<br><br>Information and health literacy key undertaking<br><br>Social determinants of family dictates child health to large extent | Government overarching leader and supporter of child health<br><br>International organizations influence organizations in country<br><br>Commercial interests of private sector | Lack of focus on preventive child health measures<br><br>Need to improve quality and equity<br><br>Difference between rural and urban areas | Prenatal services important for child health<br><br>Children have different needs at different ages | A focus on child growth<br><br>Holistic approach<br><br>Acknowledging child rights |



## Main themes and findings - full coding tables, continued.

|                       |                                                |                                                     |                                                     |                                                        |                                                                 |                                             |
|-----------------------|------------------------------------------------|-----------------------------------------------------|-----------------------------------------------------|--------------------------------------------------------|-----------------------------------------------------------------|---------------------------------------------|
| <b>Theme</b>          | Gap between theory and real world complexities |                                                     |                                                     |                                                        |                                                                 |                                             |
| <b>Sub-themes</b>     | Linear process of collaboration                |                                                     |                                                     |                                                        |                                                                 |                                             |
| <b>Categories</b>     | Actors and topics                              |                                                     |                                                     | Identifying and framing problem                        |                                                                 |                                             |
| <b>Sub-categories</b> | Broad variety of actors                        | Territory feelings                                  | Collaborations focused on non-health aspects        | Top-down approach                                      | Bottom-up approach                                              | Framing of problem                          |
| <b>Codes</b>          | Government as natural leader                   | There exist strict boundaries between actors        | Focused on preventive issues                        | Government or ministries identifies need               | Listening to stakeholders in community or on sub-national level | Research as a way of narrowing problem      |
|                       | Civil society networks                         | Competition between actors for funding              | Collaboration indirectly see effect on child health | National policy or development plan                    | Routine data or findings from actual situation on the ground    | Involving many actors in collective process |
|                       | External donors emphasize importance           | Skeptical view of government and NGO and vice versa | Willingness to connect to child health              | International agenda or external funding opportunities | Reliable data not always present                                | Detailed problem statement                  |
|                       | Many different actors collaborating            |                                                     |                                                     | From own organizational strategy or values             |                                                                 |                                             |

1  
2  
3  
4  
5  
6  
7  
8  
9  
10  
11  
12  
13  
14  
15  
16  
17  
18  
19  
20  
21  
22  
23  
24  
25  
26  
27  
28  
29  
30  
31  
32  
33  
34  
35  
36  
37  
38  
39  
40  
41  
42  
43  
44  
45  
46

Main themes and findings - full coding tables, continued.

|                       |                                                                                                                                                                                                         |                                                                                                                                                                                         |                                                                                                                            |                                                                                                                                                           |                                                                                                                                                              |                                                                                                                          |                                                                                                                                                                            |
|-----------------------|---------------------------------------------------------------------------------------------------------------------------------------------------------------------------------------------------------|-----------------------------------------------------------------------------------------------------------------------------------------------------------------------------------------|----------------------------------------------------------------------------------------------------------------------------|-----------------------------------------------------------------------------------------------------------------------------------------------------------|--------------------------------------------------------------------------------------------------------------------------------------------------------------|--------------------------------------------------------------------------------------------------------------------------|----------------------------------------------------------------------------------------------------------------------------------------------------------------------------|
| <b>Theme</b>          | Gap between theory and real world complexities                                                                                                                                                          |                                                                                                                                                                                         |                                                                                                                            |                                                                                                                                                           |                                                                                                                                                              |                                                                                                                          |                                                                                                                                                                            |
| <b>Sub-themes</b>     | Linear process of collaboration                                                                                                                                                                         |                                                                                                                                                                                         |                                                                                                                            |                                                                                                                                                           |                                                                                                                                                              |                                                                                                                          |                                                                                                                                                                            |
| <b>Categories</b>     | Planning                                                                                                                                                                                                |                                                                                                                                                                                         |                                                                                                                            | Coordination                                                                                                                                              |                                                                                                                                                              |                                                                                                                          |                                                                                                                                                                            |
| <b>Sub-categories</b> | Complex, detailed, resource constraining process                                                                                                                                                        | Capacity assessment key                                                                                                                                                                 | Prioritization depending on context                                                                                        | Varied methods of coordination                                                                                                                            | Clear division of responsibilities                                                                                                                           | Leadership paramount                                                                                                     | Power and hierarchies influence coordination                                                                                                                               |
| <b>Codes</b>          | <p>Many actors involved in planning</p> <p>Sub-national and national level engaged</p> <p>Technical level and strategy level</p> <p>Detailed collaboration plan and outline of activities, outputs,</p> | <p>Technical skill and resource capacity at implementer level instrumental</p> <p>Division of activities based on capacity</p> <p>If not enough capacity collaboration cannot begin</p> | <p>Prioritization based on funding requirements</p> <p>Politics and benefits of including certain actors or activities</p> | <p>Information sharing mechanisms</p> <p>Focal points or joint committees</p> <p>Regular, continuous coordination</p> <p>Built on existing structures</p> | <p>Agreed upon plan of responsibilities</p> <p>Common vision and commitment key for ease of coordination</p> <p>Participation in joint coordination hard</p> | <p>Single organization that explicitly or implicitly lead</p> <p>Structuring collaboration efforts depends on leader</p> | <p>Focal points for collaboration lack decision making power</p> <p>Power imbalance due to government more powerful</p> <p>Competing for funding between organizations</p> |

1  
2  
3  
4  
5  
6  
7  
8  
9  
10  
11  
12  
13  
14  
15  
16  
17  
18  
19  
20  
21  
22  
23  
24  
25  
26  
27  
28  
29  
30  
31  
32  
33  
34  
35  
36  
37  
38  
39  
40  
41  
42  
43  
44  
45  
46

|  |                                                    |  |  |  |  |  |  |
|--|----------------------------------------------------|--|--|--|--|--|--|
|  | and desired outcomes                               |  |  |  |  |  |  |
|  | Commitment and ownership implicit goals of process |  |  |  |  |  |  |

For peer review only

1  
2  
3  
4  
5  
6  
7  
8  
9  
10  
11  
12  
13  
14  
15  
16  
17  
18  
19  
20  
21  
22  
23  
24  
25  
26  
27  
28  
29  
30  
31  
32  
33  
34  
35  
36  
37  
38  
39  
40  
41  
42  
43  
44  
45  
46

Main themes and findings - full coding tables, continued.

|                       |                                                                                                                                                                             |                                                                                                                                                                                                                          |                                                                                                                                                                                                              |                                                                                                                                                                                     |                                                                                                                                                            |                                                                                                                                                                                           |                                                                                                                                                            |
|-----------------------|-----------------------------------------------------------------------------------------------------------------------------------------------------------------------------|--------------------------------------------------------------------------------------------------------------------------------------------------------------------------------------------------------------------------|--------------------------------------------------------------------------------------------------------------------------------------------------------------------------------------------------------------|-------------------------------------------------------------------------------------------------------------------------------------------------------------------------------------|------------------------------------------------------------------------------------------------------------------------------------------------------------|-------------------------------------------------------------------------------------------------------------------------------------------------------------------------------------------|------------------------------------------------------------------------------------------------------------------------------------------------------------|
| <b>Theme</b>          | Gap between theory and real world complexities                                                                                                                              |                                                                                                                                                                                                                          |                                                                                                                                                                                                              |                                                                                                                                                                                     |                                                                                                                                                            |                                                                                                                                                                                           |                                                                                                                                                            |
| <b>Sub-themes</b>     | Linear process of collaboration                                                                                                                                             |                                                                                                                                                                                                                          |                                                                                                                                                                                                              |                                                                                                                                                                                     |                                                                                                                                                            |                                                                                                                                                                                           |                                                                                                                                                            |
| <b>Categories</b>     | Implementation                                                                                                                                                              |                                                                                                                                                                                                                          |                                                                                                                                                                                                              | Monitoring and evaluation                                                                                                                                                           |                                                                                                                                                            |                                                                                                                                                                                           |                                                                                                                                                            |
| <b>Sub-categories</b> | Adaptability to change                                                                                                                                                      | Geographical and administrative level                                                                                                                                                                                    | Follows from planning and coordination                                                                                                                                                                       | Detailed but depends on funding                                                                                                                                                     | Hard to move beyond outputs                                                                                                                                | Integral to the collaboration                                                                                                                                                             | Responsibility for M&E varies                                                                                                                              |
| <b>Codes</b>          | <p>Implementation does not follow plan</p> <p>Funding changes requires change of plan</p> <p>Government involvement lead to less flexibility</p> <p>Covid-19 disruption</p> | <p>Focus on implementing organizations or participations</p> <p>Added complexity for actual implementation</p> <p>National level collaboration, sub-national implement</p> <p>Sub-national own system of priorities,</p> | <p>Implementation mirrors previous collaborative efforts</p> <p>Reduction in parallel work and efficient implementation</p> <p>Takes time and resources to implement, need to be considered before start</p> | <p>Funding source and resources key for allowing M&amp;E</p> <p>M&amp;E include detailed indicators</p> <p>Government or external donor relies heavily on M&amp;E for decisions</p> | <p>Discrepancy in M&amp;E between stakeholders</p> <p>Particularly hard to attribute success or failures</p> <p>Quantitative indicators more favorable</p> | <p>Learning from failure</p> <p>M&amp;E seen as opportunity to learn and improve</p> <p>Successes can build momentum, secure resources</p> <p>Serves as main accountability mechanism</p> | <p>Internal or external evaluation depending on context and resources</p> <p>One stakeholder monitors activities</p> <p>Joint monitoring of activities</p> |

1  
2  
3  
4  
5  
6  
7  
8  
9  
10  
11  
12  
13  
14  
15  
16  
17  
18  
19  
20  
21  
22  
23  
24  
25  
26  
27  
28  
29  
30  
31  
32  
33  
34  
35  
36  
37  
38  
39  
40  
41  
42  
43  
44  
45  
46

|  |  |                         |  |  |  |  |  |
|--|--|-------------------------|--|--|--|--|--|
|  |  | relationships and focus |  |  |  |  |  |
|--|--|-------------------------|--|--|--|--|--|

For peer review only

1  
2  
3  
4  
5  
6  
7  
8  
9  
10  
11  
12  
13  
14  
15  
16  
17  
18  
19  
20  
21  
22  
23  
24  
25  
26  
27  
28  
29  
30  
31  
32  
33  
34  
35  
36  
37  
38  
39  
40  
41  
42  
43  
44  
45  
46

Main themes and findings - full coding tables, continued.

|                       |                                                              |                                                                         |                                                                                                                                                                       |                                                                                                                                                                                   |                                                                                                                                                                     |                                                                                        |                                                                                                                                                                                |
|-----------------------|--------------------------------------------------------------|-------------------------------------------------------------------------|-----------------------------------------------------------------------------------------------------------------------------------------------------------------------|-----------------------------------------------------------------------------------------------------------------------------------------------------------------------------------|---------------------------------------------------------------------------------------------------------------------------------------------------------------------|----------------------------------------------------------------------------------------|--------------------------------------------------------------------------------------------------------------------------------------------------------------------------------|
| <b>Theme</b>          | Gap between theory and real world complexities               |                                                                         |                                                                                                                                                                       |                                                                                                                                                                                   |                                                                                                                                                                     |                                                                                        |                                                                                                                                                                                |
| <b>Sub-themes</b>     | Linear process of collaboration                              |                                                                         | Real-world complexities shaping the collaboration                                                                                                                     |                                                                                                                                                                                   |                                                                                                                                                                     |                                                                                        |                                                                                                                                                                                |
| <b>Categories</b>     | Dissemination                                                |                                                                         | Funding                                                                                                                                                               |                                                                                                                                                                                   | Relationships                                                                                                                                                       |                                                                                        |                                                                                                                                                                                |
| <b>Sub-categories</b> | Information spreading                                        | Recognition                                                             | Call for more funding                                                                                                                                                 | Funding as a source of power                                                                                                                                                      | Facilitate or hamper collaboration                                                                                                                                  | Actively building relationships                                                        | Relationships as an outcome                                                                                                                                                    |
| <b>Codes</b>          | Engage the public and stakeholders<br><br>Increase awareness | Engaging national-level government<br><br>Gain international reputation | Budget greatest limitation to collaboration<br><br>Not enough government/national funding<br><br>Funding sources varies<br><br>If government funding more sustainable | External donors agenda decide activities<br><br>If funding from government they have last say<br><br>Leadership often based on funding<br><br>Ministry of economy key stakeholder | Tensions between NGOs and government evident<br><br>Conflicts within government or NGO networks<br><br>Common understanding and relationships increase coordination | Continuous relationship building<br><br>Efforts by stakeholders to build relationships | Over time relationships built through coordination meetings and implementation<br><br>Evolve between key focal points<br><br>Mutual understanding lead to trust and confidence |

1  
2  
3  
4  
5  
6  
7  
8  
9  
10  
11  
12  
13  
14  
15  
16  
17  
18  
19  
20  
21  
22  
23  
24  
25  
26  
27  
28  
29  
30  
31  
32  
33  
34  
35  
36  
37  
38  
39  
40  
41  
42  
43  
44  
45  
46

|  |  |  |  |                                                 |  |  |  |
|--|--|--|--|-------------------------------------------------|--|--|--|
|  |  |  |  | Decide design and coordination of collaboration |  |  |  |
|--|--|--|--|-------------------------------------------------|--|--|--|

For peer review only

1  
2  
3  
4  
5  
6  
7  
8  
9  
10  
11  
12  
13  
14  
15  
16  
17  
18  
19  
20  
21  
22  
23  
24  
25  
26  
27  
28  
29  
30  
31  
32  
33  
34  
35  
36  
37  
38  
39  
40  
41  
42  
43  
44  
45  
46

Main themes and findings - full coding tables, continued.

|                       |                                                   |                                                |                                               |                                                                                  |                                      |                                     |                                 |                                    |                                             |                                                 |
|-----------------------|---------------------------------------------------|------------------------------------------------|-----------------------------------------------|----------------------------------------------------------------------------------|--------------------------------------|-------------------------------------|---------------------------------|------------------------------------|---------------------------------------------|-------------------------------------------------|
| <b>Theme</b>          | Gap between theory and real world complexities    |                                                |                                               |                                                                                  |                                      |                                     |                                 |                                    |                                             |                                                 |
| <b>Sub-themes</b>     | Real-world complexities shaping the collaboration |                                                |                                               |                                                                                  |                                      | Critically assessing collaborations |                                 |                                    |                                             |                                                 |
| <b>Categories</b>     | Enabling environment                              |                                                | Capacity building                             |                                                                                  |                                      | Success factors                     |                                 |                                    | Obstacles                                   |                                                 |
| <b>Sub-categories</b> | Policies                                          | Government                                     | Actual method depends on collaboration        | Key for sustainability                                                           | Demands resources                    | Clear responsibilities              | Common vision and understanding | Secure buy in                      | Real world complexities                     | Lack of accountability                          |
| <b>Codes</b>          | International agenda facilitate work              | Active and collaborative government ministries | In person technical capacity building         | Learning and incorporating changes                                               | Capacity building takes time         | Agreement on division of activities | Learning continuously           | Engage stakeholders from beginning | Lack of funding, sustainability             | No commitment to work together                  |
|                       | Sub-national plans for development                | Existing multisectoral ministerial committees  | Natural reciprocal                            | Integral part of collaboration itself, one of main benefits                      | Capacity building limited by funding | Leadership from all                 | Open sharing and discussion     | Government and sustainable funding | Politics on sub-national and national level | Lack of transparency                            |
|                       | National CSDG roadmap and other national plans    |                                                | Effort to include capacity building           | Building capacity with implementors or sub/national level lead to sustainability |                                      | Functioning M&E                     | Benefits and goals explicit     | Commitment from all                | Competing priorities and work               | Difficulty of attributing failures or successes |
|                       |                                                   |                                                | Capacity building according to administrative |                                                                                  |                                      |                                     |                                 | Relationship and capacity building |                                             |                                                 |



1  
2  
3  
4  
5  
6  
7  
8  
9  
10  
11  
12  
13  
14  
15  
16  
17  
18  
19  
20  
21  
22  
23  
24  
25  
26  
27  
28  
29  
30  
31  
32  
33  
34  
35  
36  
37  
38  
39  
40  
41  
42  
43  
44  
45  
46

|  |  |  |                              |  |  |  |  |  |  |  |
|--|--|--|------------------------------|--|--|--|--|--|--|--|
|  |  |  | and<br>geographical<br>level |  |  |  |  |  |  |  |
|--|--|--|------------------------------|--|--|--|--|--|--|--|

For peer review only

1  
2  
3  
4  
5  
6  
7  
8  
9  
10  
11  
12  
13  
14  
15  
16  
17  
18  
19  
20  
21  
22  
23  
24  
25  
26  
27  
28  
29  
30  
31  
32  
33  
34  
35  
36  
37  
38  
39  
40  
41  
42  
43  
44  
45  
46

## Examples of multisectoral collaboration that include child health and well-being in Cambodia

| Name                                                                   | Short description                                                                                                                                                                                                                                                                                                                                                                                                                                                                                                   | Source                                                                                                                                                                                                                                                                                      |
|------------------------------------------------------------------------|---------------------------------------------------------------------------------------------------------------------------------------------------------------------------------------------------------------------------------------------------------------------------------------------------------------------------------------------------------------------------------------------------------------------------------------------------------------------------------------------------------------------|---------------------------------------------------------------------------------------------------------------------------------------------------------------------------------------------------------------------------------------------------------------------------------------------|
| Multisectoral Food and Nutrition Security in Cambodia (MUSEFO)         | Through a multisectoral approach, the programme aims to improve the nutrition of women and young children through<br>i) Improving the quality of nutrition services by providing training for health workers.<br>ii) Diversifying nutrition and food production by providing trainings for farmers, building their capacity to grow a more diverse range of crops and improving their access to healthy foods.<br>iii) Embedding successful approaches on national and regional level is the third field of action. | <a href="https://giz-cambodia.com/wordpress/wp-content/uploads/10_FactSheet-of-Multisectoral-Food-and-Nutrition-Security-in-Cambodia-MUSEFO.pdf">https://giz-cambodia.com/wordpress/wp-content/uploads/10_FactSheet-of-Multisectoral-Food-and-Nutrition-Security-in-Cambodia-MUSEFO.pdf</a> |
| Identification of Poor Households Programme (ID Poor)                  | The ID Poor program aim to identify at risk or poor households in Cambodia and provide Equity Cards to these households as a basis for assessing social assistance services. This can then be used by various ministries or other organizations to assist at-risk households with healthcare for children.                                                                                                                                                                                                          | <a href="https://idpoor.gov.kh/en/">https://idpoor.gov.kh/en/</a>                                                                                                                                                                                                                           |
| The Second National Strategy for Food Security and Nutrition 2019-2023 | Acknowledging the cross-cutting challenges facing the ambition to provide proper food and nutrition, including promoting infant breastfeeding practices, the government has implemented a national-wide strategy which explicitly take an multisectoral approach to nutrition.                                                                                                                                                                                                                                      | <a href="https://scalingupnutrition.org/sites/default/files/2022-06/national-nutrition-plan-cambodia.pdf">https://scalingupnutrition.org/sites/default/files/2022-06/national-nutrition-plan-cambodia.pdf</a>                                                                               |
| Raising Awareness and Innovative                                       | Led by Save the Children, the project used innovative approaches to increase awareness and appreciation of a                                                                                                                                                                                                                                                                                                                                                                                                        | <a href="https://resourcecentre.savethechildren.net/pdf/RAISE-Evaluation-Report.-Final.-16-March-2022-1.pdf/">https://resourcecentre.savethechildren.net/pdf/RAISE-Evaluation-Report.-Final.-16-March-2022-1.pdf/</a>                                                                       |

|                                                                                                        |                                                                                                                                                                                                                                                                                                     |                                                                                                                                                                                                                                                                                                                                                                                           |
|--------------------------------------------------------------------------------------------------------|-----------------------------------------------------------------------------------------------------------------------------------------------------------------------------------------------------------------------------------------------------------------------------------------------------|-------------------------------------------------------------------------------------------------------------------------------------------------------------------------------------------------------------------------------------------------------------------------------------------------------------------------------------------------------------------------------------------|
| Strategies for ECD (RAISE)                                                                             | holistic approach to early childhood development in 43 villages in Kampong Siem district.                                                                                                                                                                                                           |                                                                                                                                                                                                                                                                                                                                                                                           |
| Family Care First (FCF) and Responsive and Effective Child Welfare Systems Transformation (REACT)      | Facilitated by Save the Children, the project is a multi-donor supported network of organizations including government, NGO's and UN organizations working together to support children to live in safe, nurturing family-based care. The work take place across numerous sectors and stakeholders. | <a href="https://resourcecentre.savethechildren.net/pdf/Gender%20Intersectionality%20and%20Family%20Separation%20Alternative%20Care%20and%20the%20Reintegration%20of%20Children%20FINAL_0.pdf/">https://resourcecentre.savethechildren.net/pdf/Gender%20Intersectionality%20and%20Family%20Separation%20Alternative%20Care%20and%20the%20Reintegration%20of%20Children%20FINAL_0.pdf/</a> |
| The Fifth National Strategic Plan for a Comprehensive, Multi-Sectoral Response to HIV/AIDS (2019-2023) | Through a multisectoral approach and partnership across ministries and different organizations, Cambodia is working towards the 90-90-90 targets and eventually elimination of new HIV infections including mother-to-child transmission.                                                           | <a href="http://www.healthpolicyplus.com/ns/pubs/17402-17725_CambodiaStrategicPlan.pdf">http://www.healthpolicyplus.com/ns/pubs/17402-17725_CambodiaStrategicPlan.pdf</a>                                                                                                                                                                                                                 |

## Supplementary Material 2. Reflexivity Statement

### Study conceptualisation:

1. How does this study address local research and policy priorities?

This study is a part of an effort to provide country specific knowledge of multisectoral collaborations in Cambodia, a key knowledge gap identified by stakeholders and academia. The government and other organizations are actively engaging in multisectoral collaborations, and understanding how the function in practice is a key priority.

2. How were local researchers involved in study design?

The local researchers (SS and TC) were engaged in the overall design of the study and particularly the identification and recruitment of participants as well as development of the interview guides and data collection. They were core members of the study team.

### Research management:

1. How has funding been used to support the local research team(s)?

The study was funded through the Swedish Research Council (2018-03609) with the majority of funding dedicated to country study activities and local research colleagues (SS and TC).

### Data acquisition and analysis:

1. How are research staff who conducted data collection acknowledged?

The researchers who conducted data collection met the authorship criteria and are hence acknowledged as co-authors of the study.

2. How have members of the research partnership been provided with access to study data?

All members of the research team, including SS and TC, had full access to the data.

3. How were data used to develop analytical skills within the partnership?

The qualitative data analysis was conducted by DH with input and training of DH, SS and TC by a qualitative research expert (HMA).

### Data interpretation:

1. How have research partners collaborated in interpreting study data?

The results from the study were continuously discussed with the local research colleagues (SS and TC) who contributed significantly to the interpretation of the results.

### Drafting and revising for intellectual content:

1. How were research partners supported to develop writing skills?

Most of the writing of the manuscript was done by DH, however local research colleagues (SS and TC) provided crucial input.

1  
2  
3  
4  
5  
6  
7  
8  
9  
10  
11  
12  
13  
14  
15  
16  
17  
18  
19  
20  
21  
22  
23  
24  
25  
26  
27  
28  
29  
30  
31  
32  
33  
34  
35  
36  
37  
38  
39  
40  
41  
42  
43  
44  
45  
46  
47  
48  
49  
50  
51  
52  
53  
54  
55  
56  
57  
58  
59  
60

2. How will research products be shared to address local needs?

The results from the study will be disseminated widely to an international and national audience, including a dissemination seminar with relevant country stakeholders.

#### **Authorship:**

1. How is the leadership, contribution and ownership of this work by LMIC researchers recognized within the authorship?

The local researchers (SS and TC) authors 2-3, recognizing their crucial hands-on contribution to the study.

2. How have early career researchers across the partnership been included within the authorship team?

The first author is a PhD student (although not from a LMIC), SS and TC are recognized experienced researchers.

3. How has gender balance been addressed within the authorship?

Out of the seven authors, four are male (DH, SS, TC and TA) while three (HN, SK and HMA) are female. The preponderance for male authors is weighted against the critical study design and interpretation by HN and SK while HMA is a world-leading qualitative expert.

#### **Training:**

1. How has the project contributed to training of LMIC researchers?

The LMIC researchers (SS and TC) are experienced qualitative researchers, however within this study all authors gained refresher trainings and developed their qualitative analytical skills and knowledge of framework method analysis by HMA (qualitative expert).

#### **Infrastructure:**

1. How has the project contributed to improvements in local infrastructure?

No direct benefit in local infrastructure has come from this qualitative study, however the findings of the study can help to conceptualize and form partnerships across sectors that can lead to improvements in infrastructure.

#### **Governance:**

1. What safeguarding procedures were used to protect local study participants and researchers?

The study conforms to the Helsinki declaration and followed the ethical and practical guidelines stipulated by the National Ethics Committee for Health Research in Cambodia regarding the safety of researchers and participants.

1  
2  
3  
4  
5  
6  
7  
8  
9  
10  
11  
12  
13  
14  
15  
16  
17  
18  
19  
20  
21  
22  
23  
24  
25  
26  
27  
28  
29  
30  
31  
32  
33  
34  
35  
36  
37  
38  
39  
40  
41  
42  
43  
44  
45  
46

# Sustainable development goals and multisectoral collaborations for child health in Cambodia: a qualitative interview study with key child health stakeholders

## Consolidated criteria for reporting qualitative studies (COREQ): 32-item checklist

| No.                                     | Item                     | Description                                                                                                                                        | Page |
|-----------------------------------------|--------------------------|----------------------------------------------------------------------------------------------------------------------------------------------------|------|
| Domain 1: Research team and reflexivity |                          |                                                                                                                                                    |      |
| Personal characteristics                |                          |                                                                                                                                                    |      |
| 1                                       | Interviewer/facilitator  | SS and TC conducted the interviews                                                                                                                 | 4    |
| 2                                       | Credentials              | DH has a MD, SS has PhD, TC has MD and has a Master of Arts in Health Social Sciences, HN has a PhD, KR has a PhD, HMA has a PhD and TA has a PhD. | 1    |
| 3                                       | Occupation               | DH was a PhD candidate, SS was a lecturer at the Royal University of Phnom Penh, TC was a program manager at Malaria Consortium Cambodia.          | 1    |
| 4                                       | Gender                   | All interviewers were male.                                                                                                                        | NA   |
| 5                                       | Experience and training  | The researchers (SS and TC) had extensive experience of qualitative interviews from previous research in Cambodia.                                 | 16   |
| Relationship with participants          |                          |                                                                                                                                                    |      |
| 6                                       | Relationship established | No relationship was established prior to study commencement.                                                                                       | 16   |

|                        |                                          |                                                                                                                                                                                                                                                                                                               |    |
|------------------------|------------------------------------------|---------------------------------------------------------------------------------------------------------------------------------------------------------------------------------------------------------------------------------------------------------------------------------------------------------------|----|
| 7                      | Participant knowledge of the interviewer | In some instances, the participant recognized the interviewer from attending similar events/workshops/seminars but in general the participants did not know the interviewers. They did not know the personal goals or reasons for doing the research for the individual interviewer.                          | 16 |
| 8                      | Interviewer characteristics              | The interviewers were all interested in the topic in general and had expertise in child health in Cambodia.                                                                                                                                                                                                   | 4  |
| Domain 2: Study design |                                          |                                                                                                                                                                                                                                                                                                               |    |
| Theoretical framework  |                                          |                                                                                                                                                                                                                                                                                                               |    |
| 9                      | Methodological orientation and theory    | The methodological orientation of the study is content analysis, specifically framework analysis.                                                                                                                                                                                                             | 4  |
| Participant selection  |                                          |                                                                                                                                                                                                                                                                                                               |    |
| 10                     | Sampling                                 | Participants were purposively selected based on predefined criteria of having expertise in child health or being from a non-health sector (for example water and sanitation, agriculture, infrastructure etc.) but with implementation knowledge of how that sector interacts with other sectors in Cambodia. | 4  |
| 11                     | Method of approach                       | Participants were approached via email and telephone.                                                                                                                                                                                                                                                         | NA |
| 12                     | Sample size                              | 29 participated in the interviews.                                                                                                                                                                                                                                                                            | 4  |
| 13                     | Non-participation                        | No participants refused or dropped out.                                                                                                                                                                                                                                                                       | 4  |
| Setting                |                                          |                                                                                                                                                                                                                                                                                                               |    |
| 14                     | Setting of data collection               | The interviews took place either virtually (over online meeting) or face to face, at a time and place convenient of the participant.                                                                                                                                                                          | 4  |
| 15                     | Presence of non-participants             | The were no non-participants present during the interviews.                                                                                                                                                                                                                                                   | 4  |
| 16                     | Description of sample                    | The description of the sample can be seen in Table 1 in the article.                                                                                                                                                                                                                                          | 5  |
| Data collection        |                                          |                                                                                                                                                                                                                                                                                                               |    |

1  
2  
3  
4  
5  
6  
7  
8  
9  
10  
11  
12  
13  
14  
15  
16  
17  
18  
19  
20  
21  
22  
23  
24  
25  
26  
27  
28  
29  
30  
31  
32  
33  
34  
35  
36  
37  
38  
39  
40  
41  
42  
43  
44  
45  
46

|                                 |                                |                                                                                                           |       |
|---------------------------------|--------------------------------|-----------------------------------------------------------------------------------------------------------|-------|
| 17                              | Interview guide                | This is provided in the supplementary material 1. The interview guide was piloted before the study began. | 4-5   |
| 18                              | Repeat interviews              | No repeat interviews were held.                                                                           | NA    |
| 19                              | Audio/visual recording         | Audio recording was used to collect the data.                                                             | 4     |
| 20                              | Field notes                    | No field notes were taken.                                                                                | 4     |
| 21                              | Duration                       | The duration of the interviews ranged from 45 minutes to 1 hr and 15 minutes                              | NA    |
| 22                              | Data saturation                | Is discussed with regards to information power in the article.                                            | 16    |
| 23                              | Transcripts returned           | Transcripts were not returned to participants.                                                            | NA    |
| Domain 3: Analysis and findings |                                |                                                                                                           |       |
| Data analysis                   |                                |                                                                                                           |       |
| 24                              | Number of data coders          | DH coded the data                                                                                         | 8     |
| 25                              | Description of the coding tree | Is presented in Table 2 in the manuscript and supplementary material 1.                                   | 9     |
| 26                              | Derivation of themes           | The themes were derived from the data.                                                                    | 8     |
| 27                              | Software                       | Nvivo software were used for the coding.                                                                  | 8     |
| 28                              | Participant checking           | The participants did not provide feedback on the findings.                                                | NA    |
| Reporting                       |                                |                                                                                                           |       |
| 29                              | Quotations presented           | Quotations presented with each paragraph, trying to illustrate the main points.                           | 10-14 |
| 30                              | Data and findings consistent   | The data and findings were cross-checked multiple times, ensuring consistency.                            | 16    |
| 31                              | Clarity of major themes        | Outlined in result table and in clear headings in the result section.                                     | 9-14  |
| 32                              | Clarity of minor themes        | Outlined in result table and in clear headings in the result section.                                     | 9-14  |
