# Supplementary material for: Sustainable development goals and multisectoral collaborations for child health in Cambodia: a qualitative interview study with key child health stakeholders
Source: PubMed Central journal article supplement (PMC10668300; doi:10.1136/bmjopen-2023-073853), 2023-11-21
Supplement: bmjopen-2023-073853supp001.pdf [file bmjopen-2023-073853supp001.pdf]

## Supplementary Material 1

### Table of Contents

|                                                                                                          |           |
|----------------------------------------------------------------------------------------------------------|-----------|
| <b>Interview Guide .....</b>                                                                             | <b>2</b>  |
| <b>Consolidated criteria for reporting qualitative studies (COREQ): 32-item checklist .....</b>          | <b>6</b>  |
| <b>Full coding tables .....</b>                                                                          | <b>9</b>  |
| <b>Examples of multisectoral collaboration that include child health and well-being in Cambodia.....</b> | <b>21</b> |

## Interview Guide

### 1. Background information. Please mark and fill in the following questions on this sheet

|                                                                             |
|-----------------------------------------------------------------------------|
| <b>1. How many years have you worked:</b> _____                             |
| <b>2. Sex</b> <input type="checkbox"/> Female <input type="checkbox"/> Male |
| <b>3. Education</b>                                                         |
| Highest degree: _____                                                       |
| Topic of degree: _____                                                      |

|                                                                                                                              |                          |                          |                                                             |                          |                          |
|------------------------------------------------------------------------------------------------------------------------------|--------------------------|--------------------------|-------------------------------------------------------------|--------------------------|--------------------------|
| <b>4. Work experience</b>                                                                                                    |                          |                          |                                                             |                          |                          |
| <b>Current employment</b>                                                                                                    |                          |                          |                                                             |                          |                          |
| <b>Organization:</b> _____                                                                                                   |                          |                          | <b>Role/Position:</b> _____                                 |                          |                          |
| <b>Work experience from the following sectors (represented by Cambodia Sustainable Development Goals) - Multiple Answers</b> |                          |                          |                                                             |                          |                          |
| <b>Sectors</b>                                                                                                               | <b>Rural</b>             | <b>Urban</b>             | <b>Sectors</b>                                              | <b>Rural</b>             | <b>Urban</b>             |
| 1. Poverty/social protection                                                                                                 | <input type="checkbox"/> | <input type="checkbox"/> | 10. Income inequality                                       | <input type="checkbox"/> | <input type="checkbox"/> |
| 2. Food and nutrition                                                                                                        | <input type="checkbox"/> | <input type="checkbox"/> | 11. Sustainable cities/communities/urban planning           | <input type="checkbox"/> | <input type="checkbox"/> |
| 3. Health and well-being                                                                                                     | <input type="checkbox"/> | <input type="checkbox"/> | 12. Safe consumption and production                         | <input type="checkbox"/> | <input type="checkbox"/> |
| 4. Education                                                                                                                 | <input type="checkbox"/> | <input type="checkbox"/> | 13. Climate change                                          | <input type="checkbox"/> | <input type="checkbox"/> |
| 5. Gender equality                                                                                                           | <input type="checkbox"/> | <input type="checkbox"/> | 14. Life bellow water/ocean                                 | <input type="checkbox"/> | <input type="checkbox"/> |
| 6. Water and sanitation                                                                                                      | <input type="checkbox"/> | <input type="checkbox"/> | 15. Life on land/natural resources                          | <input type="checkbox"/> | <input type="checkbox"/> |
| 7. Energy                                                                                                                    | <input type="checkbox"/> | <input type="checkbox"/> | 16. Institutional strengthening/anti corruption/legislation | <input type="checkbox"/> | <input type="checkbox"/> |
| 8. Labor market, financial sector                                                                                            | <input type="checkbox"/> | <input type="checkbox"/> | 17. Partnerships/collaborative networks                     | <input type="checkbox"/> | <input type="checkbox"/> |

|                                                                                                                                                                                                                |                          |                          |                            |                          |                          |
|----------------------------------------------------------------------------------------------------------------------------------------------------------------------------------------------------------------|--------------------------|--------------------------|----------------------------|--------------------------|--------------------------|
| 9. Industry and infrastructure                                                                                                                                                                                 | <input type="checkbox"/> | <input type="checkbox"/> | 18. Cambodia Mine/ERW free | <input type="checkbox"/> | <input type="checkbox"/> |
| Other:                                                                                                                                                                                                         |                          |                          |                            | <input type="checkbox"/> | <input type="checkbox"/> |
| <p><b>Have you worked related to child health (both health and non-health sector)?</b> <input type="checkbox"/> Yes <input type="checkbox"/> No</p> <p><b>If yes, please describe shortly in what way:</b></p> |                          |                          |                            |                          |                          |

*Thank you for providing telling us your background, we would now like to know a little bit more about your views on the topics of Sustainable Development, child health and multisectoral work in general.*

## **2. Background: Sustainable Development Goals, child health and multisectoral work**

*The 2030 Agenda and the 17 Sustainable Development Goals is a framework with a comprehensive set of goals adopted by the UN in 2015 for all countries to end poverty, protect the planet and ensure prosperity for all. These have been adapted to the Cambodia Sustainable Goals.*

2.1. What were your first thoughts/opinion when the 2030 Agenda and the Sustainable Development Goals were launched?

2.1.2. What have your organization done now in relation to the Sustainable Development Goals in Cambodia compared to what you did with the Millennium Development Goals before and? (*mode of work rather than specific activities*)

2.2. Could you please describe what you would say child health includes?

2.2.1 What age? What to you include in the term “health” when it comes to children?

2.2.2 Are there any particular aspects of the health of children that you think the health system need to take special consideration to?

2.3. How do you think actors in Cambodia contribute in supporting child health to implement the Cambodia Sustainable Development Goals?

2.4. What are the linkages/connections between child health and non-health sectors (as represented by the Cambodia Sustainable Development Goals)?

2.4.1 Please provide examples of such linkages from your current/former work or what you have observe in the society?

2.4.2 Many sectors and activities can influence child health. Which sectors do you think are most relevant for child health?

*Thank you for providing your views on these topics, now we would like to ask you some further questions on the multisectoral work around child health that you have experience from. Please think of a collaboration specifically, or generally if you have experience from many different, between two or more sectors that had the explicit goal to in some way increase child health and well-being.*

### **3. Multisectoral collaboration for child health**

Based on the Multisectoral collaborative model and the Health in all policies approach.

#### **i) Drive change/Establishing the need for multisectoral work**

3.1. Which organizations are your key stakeholders to work in promoting child health?

3.1. What was it that made the partners in the collaboration identify the need for multisectoral work? How did it begin?

#### **ii) Defining the problem and constraints**

3.2. How was the above-mentioned child health need identified, defined or framed?

#### **iii) Design of the collaboration/Planned framed action & Supportive structures and policies**

3.3. Was there a planning process of how to conduct the multisectoral work?

3.4. Which stakeholders were involved in planning?

3.5. How was the work of collaboration designed to be carried out?

3.5.1 How was the coordination organized?

3.5.2 How was the collaboration implemented?

3.5.3 How was the work of the collaboration financed or mobilized?

3.5. How do you think the multisectoral work were actually implemented compared to the plan?

3.6. Where there any supportive structures or policies in place that enabled the work to be conducted?

#### **iv) Capture success / Monitoring and evaluation**

3.7. How was the multisectoral work monitored and evaluated?

3.7.1 Was there any key indicators or markers of success monitored?

3.7.2 How was the success or failure attributed to between the partners in the collaboration?

#### **V) Relate / Facilitate assessment and engagement & Build capacity**

3.8. How did the relationship between the partners evolve during the multisectoral work?

3.9. Did the collaborating partners make any effort to improve their relationship?

3.10. Where there any efforts to engage with a wider group of actors or the public in the work?

4. Where there any type of capacity building activities included in the collaboration?

### **Final questions**

**5.1.** What are your suggestions and recommendations in order to improve multisectoral collaboration to promote child health?

**5.2.** Are there any end points you want to add on any of the topics touched upon today or that we have not spoken about?

## Consolidated criteria for reporting qualitative studies (COREQ): 32-item checklist

| No.                                     | Item                                     | Description                                                                                                                                                                                                                                                                          | Page |
|-----------------------------------------|------------------------------------------|--------------------------------------------------------------------------------------------------------------------------------------------------------------------------------------------------------------------------------------------------------------------------------------|------|
| Domain 1: Research team and reflexivity |                                          |                                                                                                                                                                                                                                                                                      |      |
| Personal characteristics                |                                          |                                                                                                                                                                                                                                                                                      |      |
| 1                                       | Interviewer/facilitator                  | SS and TC conducted the interviews                                                                                                                                                                                                                                                   | 4    |
| 2                                       | Credentials                              | DH has a MD, SS has PhD, TC has MD and has a Master of Arts in Health Social Sciences, HN has a PhD, KR has a PhD, HMA has a PhD and TA has a PhD.                                                                                                                                   | 1    |
| 3                                       | Occupation                               | DH was a PhD candidate, SS was a lecturer at the Royal University of Phnom Penh, TC was a program manager at Malaria Consortium Cambodia.                                                                                                                                            | 1    |
| 4                                       | Gender                                   | All interviewers were male.                                                                                                                                                                                                                                                          | NA   |
| 5                                       | Experience and training                  | The researchers (SS and TC) had extensive experience of qualitative interviews from previous research in Cambodia.                                                                                                                                                                   | 16   |
| Relationship with participants          |                                          |                                                                                                                                                                                                                                                                                      |      |
| 6                                       | Relationship established                 | No relationship was established prior to study commencement.                                                                                                                                                                                                                         | 16   |
| 7                                       | Participant knowledge of the interviewer | In some instances, the participant recognized the interviewer from attending similar events/workshops/seminars but in general the participants did not know the interviewers. They did not know the personal goals or reasons for doing the research for the individual interviewer. | 16   |
| 8                                       | Interviewer characteristics              | The interviewers were all interested in the topic in general and had expertise in child health in Cambodia.                                                                                                                                                                          | 4    |
| Domain 2: Study design                  |                                          |                                                                                                                                                                                                                                                                                      |      |
| Theoretical framework                   |                                          |                                                                                                                                                                                                                                                                                      |      |

|                       |                                       |                                                                                                                                                                                                                                                                                                               |     |
|-----------------------|---------------------------------------|---------------------------------------------------------------------------------------------------------------------------------------------------------------------------------------------------------------------------------------------------------------------------------------------------------------|-----|
| 9                     | Methodological orientation and theory | The methodological orientation of the study is content analysis, specifically framework analysis.                                                                                                                                                                                                             | 4   |
| Participant selection |                                       |                                                                                                                                                                                                                                                                                                               |     |
| 10                    | Sampling                              | Participants were purposively selected based on predefined criteria of having expertise in child health or being from a non-health sector (for example water and sanitation, agriculture, infrastructure etc.) but with implementation knowledge of how that sector interacts with other sectors in Cambodia. | 4   |
| 11                    | Method of approach                    | Participants were approached via email and telephone.                                                                                                                                                                                                                                                         | NA  |
| 12                    | Sample size                           | 29 participated in the interviews.                                                                                                                                                                                                                                                                            | 4   |
| 13                    | Non-participation                     | No participants refused or dropped out.                                                                                                                                                                                                                                                                       | 4   |
| Setting               |                                       |                                                                                                                                                                                                                                                                                                               |     |
| 14                    | Setting of data collection            | The interviews took place either virtually (over online meeting) or face to face, at a time and place convenient of the participant.                                                                                                                                                                          | 4   |
| 15                    | Presence of non-participants          | There were no non-participants present during the interviews.                                                                                                                                                                                                                                                 | 4   |
| 16                    | Description of sample                 | The description of the sample can be seen in Table 1 in the article.                                                                                                                                                                                                                                          | 5   |
| Data collection       |                                       |                                                                                                                                                                                                                                                                                                               |     |
| 17                    | Interview guide                       | This is provided in the supplementary material 1. The interview guide was piloted before the study began.                                                                                                                                                                                                     | 4-5 |
| 18                    | Repeat interviews                     | No repeat interviews were held.                                                                                                                                                                                                                                                                               | NA  |
| 19                    | Audio/visual recording                | Audio recording was used to collect the data.                                                                                                                                                                                                                                                                 | 4   |
| 20                    | Field notes                           | No field notes were taken.                                                                                                                                                                                                                                                                                    | 4   |
| 21                    | Duration                              | The duration of the interviews ranged from 45 minutes to 1 hr and 15 minutes                                                                                                                                                                                                                                  | NA  |
| 22                    | Data saturation                       | Is discussed with regards to information power in the article.                                                                                                                                                                                                                                                | 16  |

|                                 |                                |                                                                                 |       |
|---------------------------------|--------------------------------|---------------------------------------------------------------------------------|-------|
| 23                              | Transcripts returned           | Transcripts were not returned to participants.                                  | NA    |
| Domain 3: Analysis and findings |                                |                                                                                 |       |
| Data analysis                   |                                |                                                                                 |       |
| 24                              | Number of data coders          | DH coded the data                                                               | 8     |
| 25                              | Description of the coding tree | Is presented in Table 2 in the manuscript and supplementary material 1.         | 9     |
| 26                              | Derivation of themes           | The themes were derived from the data.                                          | 8     |
| 27                              | Software                       | Nvivo software were used for the coding.                                        | 8     |
| 28                              | Participant checking           | The participants did not provide feedback on the findings.                      | NA    |
| Reporting                       |                                |                                                                                 |       |
| 29                              | Quotations presented           | Quotations presented with each paragraph, trying to illustrate the main points. | 10-14 |
| 30                              | Data and findings consistent   | The data and findings were cross-checked multiple times, ensuring consistency.  | 16    |
| 31                              | Clarity of major themes        | Outlined in result table and in clear headings in the result section.           | 9-14  |
| 32                              | Clarity of minor themes        | Outlined in result table and in clear headings in the result section.           | 9-14  |



## Full coding tables

### Main themes and findings - full coding tables

|                      |                                                       |                                           |                                                          |                                                         |
|----------------------|-------------------------------------------------------|-------------------------------------------|----------------------------------------------------------|---------------------------------------------------------|
| <b>Theme</b>         | SDGs and expanded view on child health enable change  |                                           |                                                          |                                                         |
| <b>Sub-themes</b>    | Possibility for action due to SDGs                    |                                           |                                                          |                                                         |
| <b>Categories</b>    | Government commitment to and leadership of SDGs       | SDGs provide a common vision and guide    |                                                          | Discrepancy between ambition and actual work            |
| <b>Subcategories</b> |                                                       | More detailed than MDGs                   | Showcase that health is a multisectoral issue            |                                                         |
| <b>Codes</b>         | Adoption and change of national plans and policies    | Provide a clear set of goals              | Illustrate that health is a multisectoral issue          | SDGs too complex, impossible to succeed                 |
|                      | No change in government as leaders of the goals       | Provide a roadmap or guide                | SDGs reflecting actual conditions with regards to health | High ambition not matched with resources/work committed |
|                      | SDG implementation depends on alignment to government | More detailed                             |                                                          |                                                         |
|                      |                                                       | More complex reflecting actual conditions |                                                          |                                                         |

## Main themes and findings - full coding tables, continued.

|                       |                                                                    |                                                                                           |                                                                                                            |                                                                                                                               |                                                                                                                                         |                                                                                                                 |
|-----------------------|--------------------------------------------------------------------|-------------------------------------------------------------------------------------------|------------------------------------------------------------------------------------------------------------|-------------------------------------------------------------------------------------------------------------------------------|-----------------------------------------------------------------------------------------------------------------------------------------|-----------------------------------------------------------------------------------------------------------------|
| <b>Themes</b>         | SDGs and expanded view on child health enable change               |                                                                                           |                                                                                                            |                                                                                                                               |                                                                                                                                         |                                                                                                                 |
| <b>Sub-themes</b>     | Higher ambitions for child health, a multisectoral area at heart   |                                                                                           |                                                                                                            |                                                                                                                               |                                                                                                                                         |                                                                                                                 |
| <b>Categories</b>     | Definition of child health                                         |                                                                                           | Child health linkages across sectors                                                                       |                                                                                                                               |                                                                                                                                         |                                                                                                                 |
| <b>Sub-categories</b> | Child age under 18 years                                           | A focus on not only health but well-being                                                 | Child health by definition a multisectoral issue                                                           | Education and schooling                                                                                                       | Nutrition                                                                                                                               | General societal conditions                                                                                     |
| <b>Codes</b>          | General view and legally a child is a person under 18 years of age | Physical and mental health equally important<br><br>Good nutrition and absence of disease | All SDGs important for child health<br><br>The linkages between sectors and child health cannot be divided | Education as most formative experience<br><br>School important physical place for linkages<br><br>Early child development key | Nutrition and functioning agricultural sector as basis for child growth<br><br>Commercial interests conflicts with good child nutrition | Physical safety and hygiene environment<br><br>Economic development of country<br><br>Social protection systems |

## Main themes and findings - full coding tables, continued.

|                       |                                                                                                                                                                                |                                                                                                                                                                                 |                                                                                                                                             |                                                                                                     |                                                                                    |
|-----------------------|--------------------------------------------------------------------------------------------------------------------------------------------------------------------------------|---------------------------------------------------------------------------------------------------------------------------------------------------------------------------------|---------------------------------------------------------------------------------------------------------------------------------------------|-----------------------------------------------------------------------------------------------------|------------------------------------------------------------------------------------|
| <b>Theme</b>          | SDGs and expanded view on child health enable change                                                                                                                           |                                                                                                                                                                                 |                                                                                                                                             |                                                                                                     |                                                                                    |
| <b>Sub-themes</b>     | Higher ambitions for child health, a multisectoral area at heart                                                                                                               |                                                                                                                                                                                 |                                                                                                                                             |                                                                                                     |                                                                                    |
| <b>Categories</b>     | Aspects of the health system and actors unique to children                                                                                                                     |                                                                                                                                                                                 |                                                                                                                                             | Special considerations for children                                                                 |                                                                                    |
| <b>Sub-categories</b> | Responsibility of family and community                                                                                                                                         | Influence of other actors                                                                                                                                                       | Key aspects of health system for improving child health                                                                                     | Life course approach                                                                                | Enabling the child to thrive                                                       |
| <b>Codes</b>          | Parents and family are the primary caretaker<br><br>Information and health literacy key undertaking<br><br>Social determinants of family dictates child health to large extent | Government overarching leader and supporter of child health<br><br>International organizations influence organizations in country<br><br>Commercial interests of private sector | Lack of focus on preventive child health measures<br><br>Need to improve quality and equity<br><br>Difference between rural and urban areas | Prenatal services important for child health<br><br>Children have different needs at different ages | A focus on child growth<br><br>Holistic approach<br><br>Acknowledging child rights |

## Main themes and findings - full coding tables, continued.

|                       |                                                                                                                                                   |                                                                                                                                                       |                                                                                                                                       |                                                                                                                                                                                                     |                                                                                                                                                                             |                                                                                                                             |
|-----------------------|---------------------------------------------------------------------------------------------------------------------------------------------------|-------------------------------------------------------------------------------------------------------------------------------------------------------|---------------------------------------------------------------------------------------------------------------------------------------|-----------------------------------------------------------------------------------------------------------------------------------------------------------------------------------------------------|-----------------------------------------------------------------------------------------------------------------------------------------------------------------------------|-----------------------------------------------------------------------------------------------------------------------------|
| <b>Theme</b>          | Gap between theory and real world complexities                                                                                                    |                                                                                                                                                       |                                                                                                                                       |                                                                                                                                                                                                     |                                                                                                                                                                             |                                                                                                                             |
| <b>Sub-themes</b>     | Linear process of collaboration                                                                                                                   |                                                                                                                                                       |                                                                                                                                       |                                                                                                                                                                                                     |                                                                                                                                                                             |                                                                                                                             |
| <b>Categories</b>     | Actors and topics                                                                                                                                 |                                                                                                                                                       |                                                                                                                                       | Identifying and framing problem                                                                                                                                                                     |                                                                                                                                                                             |                                                                                                                             |
| <b>Sub-categories</b> | Broad variety of actors                                                                                                                           | Territory feelings                                                                                                                                    | Collaborations focused on non-health aspects                                                                                          | Top-down approach                                                                                                                                                                                   | Bottom-up approach                                                                                                                                                          | Framing of problem                                                                                                          |
| <b>Codes</b>          | Government as natural leader<br><br>Civil society networks<br><br>External donors emphasize importance<br><br>Many different actors collaborating | There exist strict boundaries between actors<br><br>Competition between actors for funding<br><br>Skeptical view of government and NGO and vice versa | Focused on preventive issues<br><br>Collaboration indirectly see effect on child health<br><br>Willingness to connect to child health | Government or ministries identifies need<br><br>National policy or development plan<br><br>International agenda or external funding opportunities<br><br>From own organizational strategy or values | Listening to stakeholders in community or on sub-national level<br><br>Routine data or findings from actual situation on the ground<br><br>Reliable data not always present | Research as a way of narrowing problem<br><br>Involving many actors in collective process<br><br>Detailed problem statement |

## Main themes and findings - full coding tables, continued.

|                       |                                                                                                                                                                                                         |                                                                                                                                                                                                |                                                                                                                            |                                                                                                                                                           |                                                                                                                                                              |                                                                                                                          |                                                                                                                                                                            |
|-----------------------|---------------------------------------------------------------------------------------------------------------------------------------------------------------------------------------------------------|------------------------------------------------------------------------------------------------------------------------------------------------------------------------------------------------|----------------------------------------------------------------------------------------------------------------------------|-----------------------------------------------------------------------------------------------------------------------------------------------------------|--------------------------------------------------------------------------------------------------------------------------------------------------------------|--------------------------------------------------------------------------------------------------------------------------|----------------------------------------------------------------------------------------------------------------------------------------------------------------------------|
| <b>Theme</b>          | Gap between theory and real world complexities                                                                                                                                                          |                                                                                                                                                                                                |                                                                                                                            |                                                                                                                                                           |                                                                                                                                                              |                                                                                                                          |                                                                                                                                                                            |
| <b>Sub-themes</b>     | Linear process of collaboration                                                                                                                                                                         |                                                                                                                                                                                                |                                                                                                                            |                                                                                                                                                           |                                                                                                                                                              |                                                                                                                          |                                                                                                                                                                            |
| <b>Categories</b>     | Planning                                                                                                                                                                                                |                                                                                                                                                                                                |                                                                                                                            | Coordination                                                                                                                                              |                                                                                                                                                              |                                                                                                                          |                                                                                                                                                                            |
| <b>Sub-categories</b> | Complex, detailed, resource constraining process                                                                                                                                                        | Capacity assessment key                                                                                                                                                                        | Prioritization depending on context                                                                                        | Varied methods of coordination                                                                                                                            | Clear division of responsibilities                                                                                                                           | Leadership paramount                                                                                                     | Power and hierarchies influence coordination                                                                                                                               |
| <b>Codes</b>          | <p>Many actors involved in planning</p> <p>Sub-national and national level engaged</p> <p>Technical level and strategy level</p> <p>Detailed collaboration plan and outline of activities, outputs,</p> | <p>Technical skill and resource capacity at implementer level</p> <p>instrumental</p> <p>Division of activities based on capacity</p> <p>If not enough capacity collaboration cannot begin</p> | <p>Prioritization based on funding requirements</p> <p>Politics and benefits of including certain actors or activities</p> | <p>Information sharing mechanisms</p> <p>Focal points or joint committees</p> <p>Regular, continuous coordination</p> <p>Built on existing structures</p> | <p>Agreed upon plan of responsibilities</p> <p>Common vision and commitment key for ease of coordination</p> <p>Participation in joint coordination hard</p> | <p>Single organization that explicitly or implicitly lead</p> <p>Structuring collaboration efforts depends on leader</p> | <p>Focal points for collaboration lack decision making power</p> <p>Power imbalance due to government more powerful</p> <p>Competing for funding between organizations</p> |

|  |                                                    |  |  |  |  |  |  |
|--|----------------------------------------------------|--|--|--|--|--|--|
|  | and desired outcomes                               |  |  |  |  |  |  |
|  | Commitment and ownership implicit goals of process |  |  |  |  |  |  |

## Main themes and findings - full coding tables, continued.

|                       |                                                                                                                                                                      |                                                                                                                                                                                                                   |                                                                                                                                                                                                       |                                                                                                                                                                  |                                                                                                                                                 |                                                                                                                                                                                |                                                                                                                                                     |
|-----------------------|----------------------------------------------------------------------------------------------------------------------------------------------------------------------|-------------------------------------------------------------------------------------------------------------------------------------------------------------------------------------------------------------------|-------------------------------------------------------------------------------------------------------------------------------------------------------------------------------------------------------|------------------------------------------------------------------------------------------------------------------------------------------------------------------|-------------------------------------------------------------------------------------------------------------------------------------------------|--------------------------------------------------------------------------------------------------------------------------------------------------------------------------------|-----------------------------------------------------------------------------------------------------------------------------------------------------|
| <b>Theme</b>          | Gap between theory and real world complexities                                                                                                                       |                                                                                                                                                                                                                   |                                                                                                                                                                                                       |                                                                                                                                                                  |                                                                                                                                                 |                                                                                                                                                                                |                                                                                                                                                     |
| <b>Sub-themes</b>     | Linear process of collaboration                                                                                                                                      |                                                                                                                                                                                                                   |                                                                                                                                                                                                       |                                                                                                                                                                  |                                                                                                                                                 |                                                                                                                                                                                |                                                                                                                                                     |
| <b>Categories</b>     | Implementation                                                                                                                                                       |                                                                                                                                                                                                                   |                                                                                                                                                                                                       | Monitoring and evaluation                                                                                                                                        |                                                                                                                                                 |                                                                                                                                                                                |                                                                                                                                                     |
| <b>Sub-categories</b> | Adaptability to change                                                                                                                                               | Geographical and administrative level                                                                                                                                                                             | Follows from planning and coordination                                                                                                                                                                | Detailed but depends on funding                                                                                                                                  | Hard to move beyond outputs                                                                                                                     | Integral to the collaboration                                                                                                                                                  | Responsibility for M&E varies                                                                                                                       |
| <b>Codes</b>          | Implementation does not follow plan<br><br>Funding changes requires change of plan<br><br>Government involvement lead to less flexibility<br><br>Covid-19 disruption | Focus on implementing organizations or participations<br><br>Added complexity for actual implementation<br><br>National level collaboration, sub-national implement<br><br>Sub-national own system of priorities, | Implementation mirrors previous collaborative efforts<br><br>Reduction in parallel work and efficient implementation<br><br>Takes time and resources to implement, need to be considered before start | Funding source and resources key for allowing M&E<br><br>M&E include detailed indicators<br><br>Government or external donor relies heavily on M&E for decisions | Discrepancy in M&E between stakeholders<br><br>Particularly hard to attribute success or failures<br><br>Quantitative indicators more favorable | Learning from failure<br><br>M&E seen as opportunity to learn and improve<br><br>Successes can build momentum, secure resources<br><br>Serves as main accountability mechanism | Internal or external evaluation depending on context and resources<br><br>One stakeholder monitors activities<br><br>Joint monitoring of activities |

|  |  |                         |  |  |  |  |  |
|--|--|-------------------------|--|--|--|--|--|
|  |  | relationships and focus |  |  |  |  |  |
|--|--|-------------------------|--|--|--|--|--|



## Main themes and findings - full coding tables, continued.

| Theme          | Gap between theory and real world complexities               |                                                                         |                                                                                                                                                                       |                                                                                                                                                                                   |                                                                                                                                                                     |                                                                                        |                                                                                                                                                                                |
|----------------|--------------------------------------------------------------|-------------------------------------------------------------------------|-----------------------------------------------------------------------------------------------------------------------------------------------------------------------|-----------------------------------------------------------------------------------------------------------------------------------------------------------------------------------|---------------------------------------------------------------------------------------------------------------------------------------------------------------------|----------------------------------------------------------------------------------------|--------------------------------------------------------------------------------------------------------------------------------------------------------------------------------|
| Sub-themes     | Linear process of collaboration                              |                                                                         | Real-world complexities shaping the collaboration                                                                                                                     |                                                                                                                                                                                   |                                                                                                                                                                     |                                                                                        |                                                                                                                                                                                |
| Categories     | Dissemination                                                |                                                                         | Funding                                                                                                                                                               |                                                                                                                                                                                   | Relationships                                                                                                                                                       |                                                                                        |                                                                                                                                                                                |
| Sub-categories | Information spreading                                        | Recognition                                                             | Call for more funding                                                                                                                                                 | Funding as a source of power                                                                                                                                                      | Facilitate or hamper collaboration                                                                                                                                  | Actively building relationships                                                        | Relationships as an outcome                                                                                                                                                    |
| Codes          | Engage the public and stakeholders<br><br>Increase awareness | Engaging national-level government<br><br>Gain international reputation | Budget greatest limitation to collaboration<br><br>Not enough government/national funding<br><br>Funding sources varies<br><br>If government funding more sustainable | External donors agenda decide activities<br><br>If funding from government they have last say<br><br>Leadership often based on funding<br><br>Ministry of economy key stakeholder | Tensions between NGOs and government evident<br><br>Conflicts within government or NGO networks<br><br>Common understanding and relationships increase coordination | Continuous relationship building<br><br>Efforts by stakeholders to build relationships | Over time relationships built through coordination meetings and implementation<br><br>Evolve between key focal points<br><br>Mutual understanding lead to trust and confidence |

|  |  |  |  |                                                 |  |  |  |
|--|--|--|--|-------------------------------------------------|--|--|--|
|  |  |  |  | Decide design and coordination of collaboration |  |  |  |
|--|--|--|--|-------------------------------------------------|--|--|--|

## Main themes and findings - full coding tables, continued.

| Theme          | Gap between theory and real world complexities    |                                                |                                               |                                                                                  |                                      |                                     |                                 |                                    |                                             |                                                 |
|----------------|---------------------------------------------------|------------------------------------------------|-----------------------------------------------|----------------------------------------------------------------------------------|--------------------------------------|-------------------------------------|---------------------------------|------------------------------------|---------------------------------------------|-------------------------------------------------|
| Sub-themes     | Real-world complexities shaping the collaboration |                                                |                                               |                                                                                  |                                      | Critically assessing collaborations |                                 |                                    |                                             |                                                 |
| Categories     | Enabling environment                              |                                                | Capacity building                             |                                                                                  |                                      | Success factors                     |                                 |                                    | Obstacles                                   |                                                 |
| Sub-categories | Policies                                          | Government                                     | Actual method depends on collaboration        | Key for sustainability                                                           | Demands resources                    | Clear responsibilities              | Common vision and understanding | Secure buy in                      | Real world complexities                     | Lack of accountability                          |
| Codes          | International agenda facilitate work              | Active and collaborative government ministries | In person technical capacity building         | Learning and incorporating changes                                               | Capacity building takes time         | Agreement on division of activities | Learning continuously           | Engage stakeholders from beginning | Lack of funding, sustainability             | No commitment to work together                  |
|                | Sub-national plans for development                | Existing multisectoral ministerial committees  | Natural reciprocal                            | Integral part of collaboration itself, one of main benefits                      | Capacity building limited by funding | Leadership from all                 | Open sharing and discussion     | Government and sustainable funding | Politics on sub-national and national level | Lack of transparency                            |
|                | National CSDG roadmap and other national plans    |                                                | Effort to include capacity building           | Building capacity with implementors or sub/national level lead to sustainability |                                      | Functioning M&E                     | Benefits and goals explicit     | Commitment from all                | Competing priorities and work               | Difficulty of attributing failures or successes |
|                |                                                   |                                                | Capacity building according to administrative |                                                                                  |                                      |                                     |                                 | Relationship and capacity building |                                             |                                                 |

|  |  |  |                        |  |  |  |  |  |  |  |
|--|--|--|------------------------|--|--|--|--|--|--|--|
|  |  |  | and geographical level |  |  |  |  |  |  |  |
|--|--|--|------------------------|--|--|--|--|--|--|--|

## Examples of multisectoral collaboration that include child health and well-being in Cambodia

| Name                                                                   | Short description                                                                                                                                                                                                                                                                                                                                                                                                                                                                                                   | Source                                                                                                                                                                                                                                                                                      |
|------------------------------------------------------------------------|---------------------------------------------------------------------------------------------------------------------------------------------------------------------------------------------------------------------------------------------------------------------------------------------------------------------------------------------------------------------------------------------------------------------------------------------------------------------------------------------------------------------|---------------------------------------------------------------------------------------------------------------------------------------------------------------------------------------------------------------------------------------------------------------------------------------------|
| Multisectoral Food and Nutrition Security in Cambodia (MUSEFO)         | Through a multisectoral approach, the programme aims to improve the nutrition of women and young children through<br>i) Improving the quality of nutrition services by providing training for health workers.<br>ii) Diversifying nutrition and food production by providing trainings for farmers, building their capacity to grow a more diverse range of crops and improving their access to healthy foods.<br>iii) Embedding successful approaches on national and regional level is the third field of action. | <a href="https://giz-cambodia.com/wordpress/wp-content/uploads/10_FactSheet-of-Multisectoral-Food-and-Nutrition-Security-in-Cambodia-MUSEFO.pdf">https://giz-cambodia.com/wordpress/wp-content/uploads/10_FactSheet-of-Multisectoral-Food-and-Nutrition-Security-in-Cambodia-MUSEFO.pdf</a> |
| Identification of Poor Households Programme (ID Poor)                  | The ID Poor program aim to identify at risk or poor households in Cambodia and provide Equity Cards to these households as a basis for assessing social assistance services. This can then be used by various ministries or other organizations to assist at-risk households with healthcare for children.                                                                                                                                                                                                          | <a href="https://idpoor.gov.kh/en/">https://idpoor.gov.kh/en/</a>                                                                                                                                                                                                                           |
| The Second National Strategy for Food Security and Nutrition 2019-2023 | Acknowledging the cross-cutting challenges facing the ambition to provide proper food and nutrition, including promoting infant breastfeeding practices, the government has implemented a national-wide strategy which explicitly take an multisectoral approach to nutrition.                                                                                                                                                                                                                                      | <a href="https://scalingupnutrition.org/sites/default/files/2022-06/national-nutrition-plan-cambodia.pdf">https://scalingupnutrition.org/sites/default/files/2022-06/national-nutrition-plan-cambodia.pdf</a>                                                                               |
| Raising Awareness and Innovative                                       | Led by Save the Children, the project used innovative approaches to increase awareness and appreciation of a                                                                                                                                                                                                                                                                                                                                                                                                        | <a href="https://resourcecentre.savethechildren.net/pdf/RAISE-Evaluation-Report.-Final.-16-March-2022-1.pdf/">https://resourcecentre.savethechildren.net/pdf/RAISE-Evaluation-Report.-Final.-16-March-2022-1.pdf/</a>                                                                       |

|                                                                                                        |                                                                                                                                                                                                                                                                                                     |                                                                                                                                                                                                                                                                                                                                                                                           |
|--------------------------------------------------------------------------------------------------------|-----------------------------------------------------------------------------------------------------------------------------------------------------------------------------------------------------------------------------------------------------------------------------------------------------|-------------------------------------------------------------------------------------------------------------------------------------------------------------------------------------------------------------------------------------------------------------------------------------------------------------------------------------------------------------------------------------------|
| Strategies for ECD (RAISE)                                                                             | holistic approach to early childhood development in 43 villages in Kampong Siem district.                                                                                                                                                                                                           |                                                                                                                                                                                                                                                                                                                                                                                           |
| Family Care First (FCF) and Responsive and Effective Child Welfare Systems Transformation (REACT)      | Facilitated by Save the Children, the project is a multi-donor supported network of organizations including government, NGO's and UN organizations working together to support children to live in safe, nurturing family-based care. The work take place across numerous sectors and stakeholders. | <a href="https://resourcecentre.savethechildren.net/pdf/Gender%20Intersectionality%20and%20Family%20Separation%20Alternative%20Care%20and%20the%20Reintegration%20of%20Children%20FINAL_0.pdf/">https://resourcecentre.savethechildren.net/pdf/Gender%20Intersectionality%20and%20Family%20Separation%20Alternative%20Care%20and%20the%20Reintegration%20of%20Children%20FINAL_0.pdf/</a> |
| The Fifth National Strategic Plan for a Comprehensive, Multi-Sectoral Response to HIV/AIDS (2019-2023) | Through a multisectoral approach and partnership across ministries and different organizations, Cambodia is working towards the 90-90-90 targets and eventually elimination of new HIV infections including mother-to-child transmission.                                                           | <a href="http://www.healthpolicyplus.com/ns/pubs/17402-17725_CambodiaStrategicPlan.pdf">http://www.healthpolicyplus.com/ns/pubs/17402-17725_CambodiaStrategicPlan.pdf</a>                                                                                                                                                                                                                 |
